# Supplementary material for: Unexpectedly low recombination rates and presence of hotspots in termite genomes
Source: bioRxiv preprint, doi:10.1101/2024.03.22.586269, version 4 (2025-02-11)
Supplement: supplemental table [file 586269_file03.xlsx]

## Sheet: S1
Table S1: Sampling locations and sequencing depth
NGI_ID	User_ID	Species	Sampling_location	Coordinates	M_reads	Genome_size	Mean_depth
P21371_101	MB_H	Macrotermes bellicosus	Comoé National Park, Côte d’Ivoire	8.77 N 3.78 W	153.75	1341484495	34.3836	mean_MB:	31.4779
P21371_102	MB_I	Macrotermes bellicosus	Comoé National Park, Côte d’Ivoire	8.77 N 3.78 W	106.45	1341484495	23.8057
P21371_103	MB_J	Macrotermes bellicosus	Comoé National Park, Côte d’Ivoire	8.77 N 3.78 W	138.33	1341484495	30.9351
P21371_104	MB_K	Macrotermes bellicosus	Comoé National Park, Côte d’Ivoire	8.77 N 3.78 W	278.15	1341484495	62.2035
P21371_105	MB_L	Macrotermes bellicosus	Comoé National Park, Côte d’Ivoire	8.77 N 3.78 W	94.75	1341484495	21.1892
P21371_106	MB_M	Macrotermes bellicosus	Comoé National Park, Côte d’Ivoire	8.77 N 3.78 W	140	1341484495	31.3086
P21371_107	MB_N	Macrotermes bellicosus	Comoé National Park, Côte d’Ivoire	8.77 N 3.78 W	137.44	1341484495	30.7361
P21371_108	MB_O	Macrotermes bellicosus	Comoé National Park, Côte d’Ivoire	8.77 N 3.78 W	135.57	1341484495	30.3179
P21371_109	MB_P	Macrotermes bellicosus	Comoé National Park, Côte d’Ivoire	8.77 N 3.78 W	132.09	1341484495	29.5397
P21371_110	MB_R	Macrotermes bellicosus	Comoé National Park, Côte d’Ivoire	8.77 N 3.78 W	91.04	1341484495	20.3595
P21371_111	CS_1	Cryptotermes secundus	Palmerston-Channel Island, Australia	12.30 S 131.00 E	87.81	1018932804	25.8535	mean_CS:	34.1946
P21371_112	CS_2	Cryptotermes secundus	Palmerston-Channel Island, Australia	12.30 S 131.00 E	90.49	1018932804	26.6426
P21371_113	CS_3	Cryptotermes secundus	Palmerston-Channel Island, Australia	12.30 S 131.00 E	128.78	1018932804	37.9161
P21371_114	CS_4	Cryptotermes secundus	Palmerston-Channel Island, Australia	12.30 S 131.00 E	90.02	1018932804	26.5042
P21371_115	CS_5	Cryptotermes secundus	Palmerston-Channel Island, Australia	12.30 S 131.00 E	131.25	1018932804	38.6434
P21371_116	CS_6	Cryptotermes secundus	Palmerston-Channel Island, Australia	12.30 S 131.00 E	97.67	1018932804	28.7566
P21371_117	CS_7	Cryptotermes secundus	Palmerston-Channel Island, Australia	12.30 S 131.00 E	112.99	1018932804	33.2672
P21371_118	CS_8	Cryptotermes secundus	Palmerston-Channel Island, Australia	12.30 S 131.00 E	128.93	1018932804	37.9603
P21371_119	CS_9	Cryptotermes secundus	Palmerston-Channel Island, Australia	12.30 S 131.00 E	136.36	1018932804	40.1479
P21371_120	CS_10	Cryptotermes secundus	Palmerston-Channel Island, Australia	12.30 S 131.00 E	157.1	1018932804	46.2543

## Sheet: S2
Table S2: Significantly enriched motifs in M.bellicosus hotspots
Motif	p-value	HS coverage	fold diff.
ACGTCATACCCTGAAGA	8.7E-007	1.8%	8.9
CCGAAAGG	9.8E-005	23.7%	1.3
AGTTCGGG	1.8E-004	5.8%	1.6
GGCTGCCATYTTARAAATA	2.5E-004	1.25%	15.4
HS coverage = proportion of hotspots containing motif
fold diff. = fold enrichment of motif in hotspots

## Sheet: S3
Table S3: Significantly enriched motifs in C. secundus hotspots
Motif	p-value	HS coverage	fold diff.
ATTATCCTTCTTCAT	2.0e-003	0.55%	4.2
HS coverage = proportion of hotspots containing motif
fold diff. = fold enrichment of motif in hotspots

## Sheet: S4
Table S4: Exons predicted from mapping the Zoothermopsis nevadensis PRDM9 protein sequence to the M. bellicosus genome using Genewise
scaffold42_9663171_f40Z9663171:3910516-3945151	GeneWise	match	3910525	3936457	595.26	+	.	NA
scaffold42_9663171_f40Z9663171:3910516-3945151	GeneWise	cds	3910525	3910636	0	+	0	KRAB_3910522:3912328
scaffold42_9663171_f40Z9663171:3910516-3945151	GeneWise	intron	3910637	3912257	0	+	.	NA
scaffold42_9663171_f40Z9663171:3910516-3945151	GeneWise	cds	3912258	3912388	0	+	2	KRAB_3910522:3912328
scaffold42_9663171_f40Z9663171:3910516-3945151	GeneWise	intron	3912389	3914352	0	+	.	NA
scaffold42_9663171_f40Z9663171:3910516-3945151	GeneWise	cds	3914353	3914450	0	+	0	NA
scaffold42_9663171_f40Z9663171:3910516-3945151	GeneWise	intron	3914451	3916956	0	+	.	NA
scaffold42_9663171_f40Z9663171:3910516-3945151	GeneWise	cds	3916957	3917033	0	+	1	NA
scaffold42_9663171_f40Z9663171:3910516-3945151	GeneWise	intron	3917034	3917874	0	+	.	NA
scaffold42_9663171_f40Z9663171:3910516-3945151	GeneWise	cds	3917875	3917985	0	+	2	SSXRD_3917874:3917987
scaffold42_9663171_f40Z9663171:3910516-3945151	GeneWise	intron	3917986	3919527	0	+	.	NA
scaffold42_9663171_f40Z9663171:3910516-3945151	GeneWise	cds	3919528	3919604	0	+	2	PRSET_3919530:3926149
scaffold42_9663171_f40Z9663171:3910516-3945151	GeneWise	intron	3919605	3920723	0	+	.	NA
scaffold42_9663171_f40Z9663171:3910516-3945151	GeneWise	cds	3920724	3920915	0	+	0	PRSET_3919530:3926149
scaffold42_9663171_f40Z9663171:3910516-3945151	GeneWise	intron	3920916	3925930	0	+	.	NA
scaffold42_9663171_f40Z9663171:3910516-3945151	GeneWise	cds	3925931	3926192	0	+	0	PRSET_3919530:3926149
scaffold42_9663171_f40Z9663171:3910516-3945151	GeneWise	intron	3926193	3935027	0	+	.	NA
scaffold42_9663171_f40Z9663171:3910516-3945151	GeneWise	cds	3935028	3935301	0	+	2	NA
scaffold42_9663171_f40Z9663171:3910516-3945151	GeneWise	intron	3935302	3936084	0	+	.	NA
scaffold42_9663171_f40Z9663171:3910516-3945151	GeneWise	cds	3936085	3936457	0	+	1	ZF1_3936281:3936364;ZF2_3936197:3936280

## Sheet: S5
Table S5: Base probability matrices for predicted PRDM9 zinc finger binding motifs
M. bellicosus
base	1	2	3	4	5	6	7	8	9	10	11	12	13	14	15	16	17	18	19	20	21	22	23	24	25	26	27	28	29	30	31	32	33	34	35	36	37	38	39	40	41	42
a	0.108	0.8	0.138	0.084	0.054	0.914	0.825	0.13	0.076	0.662	0.222	0.546	0.084	0.054	0.914	0.662	0.222	0.546	0.825	0.13	0.076	0.662	0.222	0.546	0.035	0.032	0.771	0.035	0.032	0.771	0.124	0.046	0.033	0.124	0.046	0.033	0.203	0.891	0.814	0.171	0.399	0.103
c	0.066	0.02	0.352	0.006	0.011	0.037	0.033	0.674	0.362	0.18	0.496	0.044	0.006	0.011	0.037	0.18	0.496	0.044	0.033	0.674	0.362	0.18	0.496	0.044	0.015	0.918	0.055	0.015	0.918	0.055	0.155	0.867	0.64	0.155	0.867	0.64	0.102	0.047	0.105	0.059	0.128	0.31
g	0.288	0.026	0.105	0.902	0.918	0.038	0.085	0.136	0.47	0.069	0.102	0.349	0.902	0.918	0.038	0.069	0.102	0.349	0.085	0.136	0.47	0.069	0.102	0.349	0.045	0.018	0.01	0.045	0.018	0.01	0.671	0.033	0.076	0.671	0.033	0.076	0.15	0.045	0.007	0.166	0.164	0.411
t	0.539	0.154	0.406	0.008	0.017	0.011	0.057	0.06	0.093	0.089	0.18	0.061	0.008	0.017	0.011	0.089	0.18	0.061	0.057	0.06	0.093	0.089	0.18	0.061	0.905	0.032	0.164	0.905	0.032	0.164	0.05	0.054	0.252	0.05	0.054	0.252	0.545	0.017	0.075	0.605	0.309	0.176
Ent=	1.603	0.921	1.793	0.535	0.514	0.546	0.928	1.402	1.643	1.417	1.765	1.451	0.535	0.514	0.546	1.417	1.765	1.451	0.928	1.402	1.643	1.417	1.765	1.451	0.594	0.537	1.014	0.594	0.537	1.014	1.393	0.774	1.357	1.393	0.774	1.357	1.691	0.655	0.912	1.544	1.86	1.83
C. secundus
base	1	2	3	4	5	6	7	8	9	10	11	12	13	14	15	16	17	18	19	20	21
a	0.203	0.891	0.814	0.203	0.891	0.814	0.003	0.034	0.987	0.054	0.788	0.732	0.345	0.253	0.027	0.194	0.266	0.051	0.59	0.149	0.204
c	0.102	0.047	0.105	0.102	0.047	0.105	0	0.012	0.011	0.032	0.047	0.126	0.032	0.715	0.042	0.108	0.097	0.183	0.092	0.077	0.319
g	0.15	0.045	0.007	0.15	0.045	0.007	0.996	0.009	0.001	0.873	0.137	0.048	0.257	0.012	0.867	0.176	0.222	0.038	0.209	0.705	0.318
t	0.545	0.017	0.075	0.545	0.017	0.075	0.001	0.944	0.001	0.041	0.028	0.093	0.366	0.021	0.065	0.522	0.415	0.728	0.108	0.069	0.159
Ent=	1.691	0.655	0.912	1.691	0.655	0.912	0.044	0.386	0.106	0.747	1.017	1.236	1.722	1.038	0.766	1.737	1.843	1.179	1.586	1.315	1.941

## Sheet: S6
Table S6: comparison of mean ρ and CpG o/e across matched genomic features for C.secundus and M.bellicosus using paired t-tests
species	comparison	p-value*	significance**
C. secundus	rho flank-intron	0.0015	**
C. secundus	rho flank-exon	0.0009	***
C. secundus	rho exon-intron	<2.22e-16	***
C. secundus	CpGo/e flank-intron	<2.22e-16	***
C. secundus	CpGo/e flank-exon	<2.22e-16	***
C. secundus	CpGo/e exon-intron	<2.22e-16	***
M. bellicosus	rho flank-intron	1.0985	n.s.
M. bellicosus	rho flank-exon	0.2086	n.s.
M. bellicosus	rho exon-intron	2.5461	n.s.
M. bellicosus	CpGo/e flank-intron	<2.22e-16	***
M. bellicosus	CpGo/e flank-exon	<2.22e-16	***
M. bellicosus	CpGo/e exon-intron	1.253E-10	***
* Bonferroni corrected
** Significance: *>0.05, **>0.01, **>0.001, n.s. = Not significant

## Sheet: S7
Table S7A: Coefficients for the linear model describing mean ρ of a gene as a function of gene CpGo/e and flanking region ρ for M. bellicosus
	species	coefficient	std err	p-value
Intercept	M. bellicosus	-5.4050	0.570	<2.22e-16
Gene CpG o/e	M. bellicosus	19.3013	0.863	<2.22e-16
flanking region ρ	M. bellicosus	0.0705	0.004	<2.22e-16
Table S7B: Coefficients for the linear model describing mean ρ of a gene as a function of gene-expression categories for M. bellicosus
	species	coefficient	std err	p-value
Intercept	M. bellicosus	2.1397	0.328	<2.22e-16
queen_biased	M. bellicosus	-0.0003	1.289	1
king_biased	M. bellicosus	-1.0030	0.746	0.179
worker_biased	M. bellicosus	-0.7743	0.999	0.438
male_biased	M. bellicosus	1.1773	1.008	0.243
female_biased	M. bellicosus	-0.8866	0.722	0.219
reproduction_biased	M. bellicosus	-0.4624	1.311	0.724
differential_expression	M. bellicosus	1.0992	1.062	0.301

## Sheet: S8
Table S8A: Coefficients for the linear model describing mean ρ of a gene as a function of gene-expression categories for C. secundus
	species	coef	std err	p-value
Intercept	C. secundus	8.1719	1.085	<2.22e-16
Gene CpG o/e	C. secundus	4.9333	1.77	0.005
flanking region ρ	C. secundus	0.1799	0.016	<2.22e-16
Table S8B: Coefficients for the linear model describing mean ρ of a gene as a function of gene CpGo/e and flanking region ρ for C. secundus
	species	coef	std err	p-value
Intercept	C. secundus	13.5535	0.425	<2.22e-16
worker biased	C. secundus	-0.3028	1.579	0.848
queen biased	C. secundus	0.5526	1.927	0.774

## Sheet: S9
Table S9: Gene differential expression categories in M.bellicosus.
# Derived from Elsner et al. (2018) doi:10.1073/pnas.1804046115
# Note that the RNAseq data from M. bellicosus was initially mapped against M. natalensis reference. For our analysis, we only used single-gene orthologues (single_gene_orthologue_in_both_species == TRUE)
GeneID_Mnat	Mbel_orthologues	DE	single_gene_orthologue_in_both_species	single_gene_orthologue_in_Mbel	single_gene_orthologue_in_Mnat	queen_biased	king_biased	worker_biased	male_biased	female_biased	reproduction_biased
Mnat_00003	g13283.t2	TRUE	TRUE	TRUE	TRUE	TRUE	FALSE	FALSE	FALSE	TRUE	TRUE
Mnat_00004	g13284.t1	TRUE	TRUE	TRUE	TRUE	TRUE	TRUE	FALSE	TRUE	TRUE	TRUE
Mnat_00007	g13288.t1	TRUE	TRUE	TRUE	TRUE	TRUE	TRUE	FALSE	FALSE	TRUE	TRUE
Mnat_00010	g13289.t1	TRUE	TRUE	TRUE	TRUE	TRUE	FALSE	FALSE	FALSE	FALSE	TRUE
Mnat_00016	g13293.t1	TRUE	TRUE	TRUE	TRUE	FALSE	FALSE	TRUE	FALSE	FALSE	FALSE
Mnat_00017	g13295.t2;g13295.t1	TRUE	FALSE	FALSE	TRUE	TRUE	FALSE	FALSE	FALSE	FALSE	TRUE
Mnat_00018	g13296.t1	TRUE	TRUE	TRUE	TRUE	TRUE	TRUE	FALSE	FALSE	FALSE	TRUE
Mnat_00019	g13297.t5;g13297.t4	TRUE	FALSE	FALSE	TRUE	FALSE	FALSE	FALSE	FALSE	FALSE	FALSE
Mnat_00020	g13297.t2;g13297.t1;g13297.t3	TRUE	FALSE	FALSE	TRUE	FALSE	TRUE	FALSE	FALSE	FALSE	TRUE
Mnat_00021	g13298.t1	TRUE	TRUE	TRUE	TRUE	TRUE	TRUE	FALSE	FALSE	TRUE	TRUE
Mnat_00022	g11562.t1;g11567.t1;g13299.t4	TRUE	FALSE	FALSE	TRUE	TRUE	FALSE	FALSE	FALSE	FALSE	TRUE
Mnat_00024	g13299.t2	TRUE	TRUE	TRUE	TRUE	TRUE	FALSE	FALSE	FALSE	TRUE	TRUE
Mnat_00025	g13303.t1	TRUE	TRUE	TRUE	TRUE	FALSE	FALSE	TRUE	FALSE	FALSE	FALSE
Mnat_00028	g13306.t1	TRUE	TRUE	TRUE	TRUE	FALSE	TRUE	TRUE	TRUE	FALSE	FALSE
Mnat_00029	g13307.t1;g13307.t2;g13307.t3	TRUE	FALSE	FALSE	TRUE	TRUE	FALSE	FALSE	FALSE	TRUE	TRUE
Mnat_00030	g13310.t1	TRUE	TRUE	TRUE	TRUE	FALSE	TRUE	TRUE	TRUE	FALSE	FALSE
Mnat_00031	g13312.t3;g13312.t2;g13312.t1	TRUE	FALSE	FALSE	TRUE	FALSE	TRUE	TRUE	TRUE	FALSE	FALSE
Mnat_00033	g6582.t1	TRUE	FALSE	FALSE	FALSE	FALSE	FALSE	TRUE	FALSE	FALSE	FALSE
Mnat_00034	g13314.t1	TRUE	FALSE	FALSE	FALSE	TRUE	FALSE	FALSE	FALSE	FALSE	TRUE
Mnat_00035	g13315.t1	TRUE	TRUE	TRUE	TRUE	FALSE	FALSE	TRUE	FALSE	FALSE	FALSE
Mnat_00036	g13316.t1	TRUE	TRUE	TRUE	TRUE	FALSE	FALSE	TRUE	FALSE	FALSE	FALSE
Mnat_00038	g13317.t1	TRUE	TRUE	TRUE	TRUE	TRUE	FALSE	FALSE	FALSE	FALSE	TRUE
Mnat_00041	g13319.t1	TRUE	TRUE	TRUE	TRUE	TRUE	FALSE	FALSE	FALSE	TRUE	TRUE
Mnat_00043	g7156.t1	TRUE	FALSE	FALSE	FALSE	FALSE	FALSE	TRUE	FALSE	FALSE	FALSE
Mnat_00045	g13320.t1	TRUE	TRUE	TRUE	TRUE	TRUE	FALSE	FALSE	FALSE	TRUE	TRUE
Mnat_00047	g13321.t2;g13321.t1	TRUE	FALSE	FALSE	TRUE	TRUE	TRUE	FALSE	FALSE	TRUE	TRUE
Mnat_00048	g13322.t1	TRUE	TRUE	TRUE	TRUE	TRUE	TRUE	FALSE	FALSE	TRUE	TRUE
Mnat_00050	g13323.t2;g13323.t1	TRUE	FALSE	FALSE	TRUE	TRUE	TRUE	FALSE	FALSE	TRUE	TRUE
Mnat_00052	g13327.t1	TRUE	TRUE	TRUE	TRUE	FALSE	FALSE	TRUE	FALSE	FALSE	FALSE
Mnat_00054	g13329.t2	TRUE	TRUE	TRUE	TRUE	TRUE	TRUE	FALSE	FALSE	TRUE	TRUE
Mnat_00055	g13333.t1	TRUE	TRUE	TRUE	TRUE	TRUE	FALSE	FALSE	FALSE	TRUE	TRUE
Mnat_00056	g13335.t1	TRUE	TRUE	TRUE	TRUE	TRUE	FALSE	TRUE	FALSE	TRUE	FALSE
Mnat_00058	g2398.t1	TRUE	TRUE	TRUE	TRUE	FALSE	FALSE	TRUE	FALSE	FALSE	FALSE
Mnat_00059	g22452.t1;g4119.t1	TRUE	FALSE	FALSE	FALSE	FALSE	TRUE	TRUE	TRUE	FALSE	FALSE
Mnat_00060	g18532.t1	TRUE	FALSE	FALSE	FALSE	FALSE	TRUE	TRUE	TRUE	FALSE	FALSE
Mnat_00064	g17519.t1	TRUE	FALSE	FALSE	FALSE	FALSE	TRUE	TRUE	TRUE	FALSE	FALSE
Mnat_00065	g2401.t1	TRUE	TRUE	TRUE	TRUE	FALSE	TRUE	TRUE	TRUE	FALSE	TRUE
Mnat_00069	g2402.t1	TRUE	TRUE	TRUE	TRUE	FALSE	FALSE	TRUE	FALSE	FALSE	FALSE
Mnat_00076	g2407.t1	TRUE	TRUE	TRUE	TRUE	FALSE	FALSE	TRUE	FALSE	FALSE	FALSE
Mnat_00078	g2409.t1	TRUE	TRUE	TRUE	TRUE	FALSE	FALSE	TRUE	FALSE	FALSE	FALSE
Mnat_00083	g2420.t1	TRUE	FALSE	TRUE	FALSE	TRUE	FALSE	FALSE	FALSE	TRUE	TRUE
Mnat_00084	g2421.t1	TRUE	TRUE	TRUE	TRUE	FALSE	FALSE	TRUE	FALSE	FALSE	FALSE
Mnat_00088	g2833.t1;g2425.t1;g2425.t2	TRUE	FALSE	FALSE	TRUE	TRUE	FALSE	FALSE	FALSE	TRUE	TRUE
Mnat_00089	g2430.t1	TRUE	TRUE	TRUE	TRUE	FALSE	FALSE	TRUE	FALSE	FALSE	FALSE
Mnat_00090	g9720.t1	TRUE	FALSE	TRUE	FALSE	FALSE	TRUE	TRUE	TRUE	FALSE	TRUE
Mnat_00094	g2434.t1	TRUE	TRUE	TRUE	TRUE	FALSE	TRUE	TRUE	TRUE	FALSE	FALSE
Mnat_00095	g8117.t1	TRUE	FALSE	FALSE	FALSE	FALSE	FALSE	TRUE	FALSE	FALSE	FALSE
Mnat_00104	g2440.t1	TRUE	TRUE	TRUE	TRUE	TRUE	FALSE	TRUE	FALSE	FALSE	TRUE
Mnat_00107	g22861.t1	TRUE	FALSE	FALSE	FALSE	FALSE	FALSE	TRUE	FALSE	FALSE	FALSE
Mnat_00112	g2446.t1	TRUE	TRUE	TRUE	TRUE	TRUE	FALSE	FALSE	FALSE	TRUE	TRUE
Mnat_00115	g2449.t1	TRUE	TRUE	TRUE	TRUE	FALSE	TRUE	TRUE	TRUE	FALSE	FALSE
Mnat_00117	g2451.t1	TRUE	FALSE	TRUE	FALSE	FALSE	TRUE	TRUE	TRUE	FALSE	FALSE
Mnat_00119	g7477.t1	TRUE	FALSE	FALSE	FALSE	FALSE	TRUE	TRUE	TRUE	FALSE	FALSE
Mnat_00128	g23160.t1;g23160.t2	TRUE	FALSE	FALSE	TRUE	TRUE	TRUE	FALSE	FALSE	TRUE	TRUE
Mnat_00133	g22452.t1;g4119.t1	TRUE	FALSE	FALSE	FALSE	FALSE	FALSE	TRUE	FALSE	FALSE	FALSE
Mnat_00142	g4534.t1;g16435.t1;g4531.t1;g4531.t2	TRUE	FALSE	FALSE	TRUE	FALSE	TRUE	TRUE	TRUE	FALSE	FALSE
Mnat_00151	g4535.t1	TRUE	TRUE	TRUE	TRUE	FALSE	FALSE	TRUE	FALSE	FALSE	FALSE
Mnat_00153	g18958.t1	TRUE	FALSE	FALSE	FALSE	FALSE	TRUE	TRUE	TRUE	FALSE	FALSE
Mnat_00154	g2210.t1	TRUE	FALSE	FALSE	FALSE	FALSE	FALSE	TRUE	FALSE	FALSE	FALSE
Mnat_00163	g8267.t1	TRUE	TRUE	TRUE	TRUE	TRUE	TRUE	FALSE	FALSE	TRUE	TRUE
Mnat_00164	g8266.t1	TRUE	TRUE	TRUE	TRUE	FALSE	FALSE	TRUE	FALSE	FALSE	FALSE
Mnat_00165	g8265.t1	TRUE	TRUE	TRUE	TRUE	FALSE	FALSE	FALSE	FALSE	FALSE	FALSE
Mnat_00170	g8258.t1	TRUE	FALSE	FALSE	FALSE	FALSE	FALSE	TRUE	FALSE	FALSE	FALSE
Mnat_00172	g22452.t1;g4119.t1	TRUE	FALSE	FALSE	FALSE	FALSE	TRUE	TRUE	TRUE	FALSE	FALSE
Mnat_00174	g8584.t1	TRUE	TRUE	TRUE	TRUE	FALSE	FALSE	TRUE	FALSE	FALSE	FALSE
Mnat_00177	g8582.t1	TRUE	TRUE	TRUE	TRUE	TRUE	FALSE	FALSE	FALSE	FALSE	TRUE
Mnat_00178	g8581.t1	TRUE	TRUE	TRUE	TRUE	TRUE	TRUE	FALSE	FALSE	FALSE	TRUE
Mnat_00185	g8575.t1	TRUE	TRUE	TRUE	TRUE	TRUE	FALSE	FALSE	FALSE	FALSE	TRUE
Mnat_00187	g8573.t1	TRUE	TRUE	TRUE	TRUE	TRUE	FALSE	FALSE	FALSE	FALSE	TRUE
Mnat_00189	g8569.t1;g8569.t2	TRUE	FALSE	FALSE	TRUE	TRUE	FALSE	FALSE	FALSE	FALSE	TRUE
Mnat_00191	g8557.t1	TRUE	TRUE	TRUE	TRUE	FALSE	TRUE	TRUE	TRUE	FALSE	FALSE
Mnat_00193	g8549.t1	TRUE	TRUE	TRUE	TRUE	FALSE	TRUE	TRUE	TRUE	FALSE	FALSE
Mnat_00195	g8547.t1	TRUE	TRUE	TRUE	TRUE	TRUE	TRUE	FALSE	FALSE	TRUE	TRUE
Mnat_00204	g13149.t1	TRUE	TRUE	TRUE	TRUE	FALSE	TRUE	TRUE	TRUE	FALSE	FALSE
Mnat_00206	g13150.t1	TRUE	TRUE	TRUE	TRUE	FALSE	TRUE	TRUE	TRUE	FALSE	FALSE
Mnat_00207	g2210.t1	TRUE	FALSE	FALSE	FALSE	FALSE	FALSE	TRUE	FALSE	FALSE	FALSE
Mnat_00209	g22452.t1;g4119.t1	TRUE	FALSE	FALSE	FALSE	FALSE	FALSE	TRUE	FALSE	FALSE	FALSE
Mnat_00214	g2210.t1	TRUE	FALSE	FALSE	FALSE	FALSE	TRUE	TRUE	TRUE	FALSE	FALSE
Mnat_00217	g13154.t3;g13154.t2;g13154.t1	TRUE	FALSE	FALSE	TRUE	FALSE	FALSE	TRUE	FALSE	FALSE	FALSE
Mnat_00236	g13164.t1	TRUE	TRUE	TRUE	TRUE	FALSE	FALSE	TRUE	FALSE	FALSE	FALSE
Mnat_00237	g22452.t1;g4119.t1	TRUE	FALSE	FALSE	FALSE	FALSE	FALSE	TRUE	FALSE	FALSE	FALSE
Mnat_00241	g13169.t1	TRUE	TRUE	TRUE	TRUE	FALSE	FALSE	TRUE	FALSE	FALSE	FALSE
Mnat_00242	g13170.t1	TRUE	FALSE	FALSE	FALSE	TRUE	FALSE	FALSE	FALSE	TRUE	TRUE
Mnat_00245	g13172.t1	TRUE	TRUE	TRUE	TRUE	TRUE	FALSE	FALSE	FALSE	TRUE	TRUE
Mnat_00246	g13173.t1	TRUE	TRUE	TRUE	TRUE	TRUE	FALSE	FALSE	FALSE	TRUE	TRUE
Mnat_00258	g13180.t1;g15938.t1;g13179.t1	TRUE	FALSE	FALSE	TRUE	TRUE	TRUE	FALSE	FALSE	TRUE	TRUE
Mnat_00259	g13182.t2;g13182.t1	TRUE	FALSE	FALSE	TRUE	FALSE	FALSE	TRUE	FALSE	FALSE	FALSE
Mnat_00265	g13186.t1;g13184.t2;g13184.t1	TRUE	FALSE	FALSE	TRUE	TRUE	FALSE	FALSE	FALSE	TRUE	TRUE
Mnat_00267	g13185.t1;g13185.t2	TRUE	FALSE	FALSE	TRUE	TRUE	TRUE	FALSE	FALSE	TRUE	TRUE
Mnat_00269	g13187.t2	TRUE	TRUE	TRUE	TRUE	TRUE	FALSE	FALSE	FALSE	TRUE	TRUE
Mnat_00270	g13188.t1	TRUE	TRUE	TRUE	TRUE	TRUE	FALSE	FALSE	FALSE	TRUE	TRUE
Mnat_00271	g13189.t1	TRUE	FALSE	TRUE	FALSE	TRUE	FALSE	FALSE	FALSE	TRUE	TRUE
Mnat_00273	g13190.t1	TRUE	TRUE	TRUE	TRUE	TRUE	FALSE	FALSE	FALSE	TRUE	TRUE
Mnat_00276	g13196.t1	TRUE	TRUE	TRUE	TRUE	TRUE	TRUE	FALSE	FALSE	TRUE	TRUE
Mnat_00278	g13199.t1	TRUE	TRUE	TRUE	TRUE	TRUE	TRUE	FALSE	FALSE	TRUE	TRUE
Mnat_00281	g2171.t1;g13201.t1	TRUE	FALSE	FALSE	TRUE	TRUE	TRUE	FALSE	FALSE	TRUE	TRUE
Mnat_00285	g13204.t1	TRUE	TRUE	TRUE	TRUE	TRUE	FALSE	FALSE	FALSE	TRUE	TRUE
Mnat_00292	g13207.t1	TRUE	TRUE	TRUE	TRUE	FALSE	FALSE	TRUE	FALSE	FALSE	FALSE
Mnat_00293	g13208.t1	TRUE	TRUE	TRUE	TRUE	FALSE	FALSE	TRUE	FALSE	FALSE	FALSE
Mnat_00295	g13209.t2;g13209.t1	TRUE	FALSE	FALSE	TRUE	FALSE	FALSE	TRUE	FALSE	FALSE	FALSE
Mnat_00296	g13211.t1	TRUE	TRUE	TRUE	TRUE	FALSE	TRUE	FALSE	TRUE	FALSE	TRUE
Mnat_00298	g10674.t1	TRUE	FALSE	FALSE	FALSE	FALSE	FALSE	TRUE	FALSE	FALSE	FALSE
Mnat_00302	g13213.t1	TRUE	TRUE	TRUE	TRUE	FALSE	TRUE	TRUE	TRUE	FALSE	FALSE
Mnat_00303	g14824.t1	TRUE	FALSE	FALSE	FALSE	FALSE	FALSE	TRUE	FALSE	FALSE	FALSE
Mnat_00308	g13130.t1	TRUE	FALSE	TRUE	FALSE	TRUE	TRUE	FALSE	TRUE	FALSE	TRUE
Mnat_00309	g13215.t1	TRUE	TRUE	TRUE	TRUE	TRUE	TRUE	FALSE	FALSE	TRUE	TRUE
Mnat_00311	g13216.t1	TRUE	FALSE	FALSE	FALSE	FALSE	TRUE	FALSE	TRUE	FALSE	FALSE
Mnat_00312	g13217.t1	TRUE	TRUE	TRUE	TRUE	TRUE	FALSE	FALSE	FALSE	TRUE	TRUE
Mnat_00313	g13218.t1	TRUE	TRUE	TRUE	TRUE	TRUE	FALSE	FALSE	FALSE	FALSE	TRUE
Mnat_00316	g6784.t1	TRUE	TRUE	TRUE	TRUE	TRUE	FALSE	FALSE	FALSE	FALSE	TRUE
Mnat_00322	g6776.t1	TRUE	TRUE	TRUE	TRUE	FALSE	FALSE	TRUE	FALSE	FALSE	FALSE
Mnat_00323	g6775.t1	TRUE	TRUE	TRUE	TRUE	TRUE	FALSE	FALSE	FALSE	FALSE	TRUE
Mnat_00325	g6773.t1	TRUE	TRUE	TRUE	TRUE	FALSE	FALSE	TRUE	FALSE	FALSE	FALSE
Mnat_00327	g6772.t1	TRUE	TRUE	TRUE	TRUE	FALSE	FALSE	TRUE	FALSE	FALSE	FALSE
Mnat_00328	g16577.t1	TRUE	FALSE	FALSE	FALSE	FALSE	FALSE	TRUE	FALSE	FALSE	FALSE
Mnat_00333	g12126.t1	TRUE	FALSE	FALSE	FALSE	FALSE	FALSE	TRUE	FALSE	FALSE	FALSE
Mnat_00335	g6769.t1;g6769.t2	TRUE	FALSE	FALSE	TRUE	FALSE	FALSE	TRUE	FALSE	FALSE	FALSE
Mnat_00336	g6768.t1	TRUE	TRUE	TRUE	TRUE	TRUE	FALSE	FALSE	FALSE	TRUE	FALSE
Mnat_00339	g6766.t1	TRUE	TRUE	TRUE	TRUE	TRUE	FALSE	FALSE	FALSE	FALSE	TRUE
Mnat_00342	g6763.t1	TRUE	TRUE	TRUE	TRUE	TRUE	FALSE	FALSE	FALSE	TRUE	TRUE
Mnat_00344	g6762.t1	TRUE	TRUE	TRUE	TRUE	TRUE	FALSE	TRUE	FALSE	FALSE	TRUE
Mnat_00347	g20491.t1	TRUE	FALSE	FALSE	FALSE	FALSE	FALSE	TRUE	FALSE	FALSE	FALSE
Mnat_00349	g6759.t1	TRUE	FALSE	FALSE	FALSE	FALSE	TRUE	FALSE	TRUE	FALSE	TRUE
Mnat_00354	g6756.t1	TRUE	TRUE	TRUE	TRUE	TRUE	FALSE	FALSE	FALSE	TRUE	TRUE
Mnat_00355	g6754.t1	TRUE	TRUE	TRUE	TRUE	TRUE	TRUE	FALSE	FALSE	TRUE	TRUE
Mnat_00357	g6753.t1	TRUE	TRUE	TRUE	TRUE	FALSE	FALSE	TRUE	FALSE	FALSE	FALSE
Mnat_00365	g6748.t1;g6748.t2	TRUE	FALSE	FALSE	TRUE	TRUE	FALSE	FALSE	FALSE	TRUE	TRUE
Mnat_00372	g14124.t2;g14124.t1	TRUE	FALSE	FALSE	TRUE	TRUE	TRUE	FALSE	FALSE	TRUE	TRUE
Mnat_00374	g14126.t1	TRUE	TRUE	TRUE	TRUE	FALSE	TRUE	TRUE	TRUE	FALSE	FALSE
Mnat_00377	g4939.t1	TRUE	TRUE	TRUE	TRUE	FALSE	TRUE	TRUE	TRUE	FALSE	FALSE
Mnat_00382	g4941.t9;g4941.t3;g4941.t2;g4941.t1;g4941.t11;g4941.t8;g4941.t7;g4941.t4;g4941.t10;g4941.t5;g4941.t6	TRUE	FALSE	FALSE	TRUE	FALSE	TRUE	TRUE	TRUE	FALSE	FALSE
Mnat_00390	g16000.t1	TRUE	TRUE	TRUE	TRUE	FALSE	TRUE	TRUE	TRUE	FALSE	FALSE
Mnat_00395	g15987.t1	TRUE	TRUE	TRUE	TRUE	TRUE	FALSE	FALSE	FALSE	TRUE	TRUE
Mnat_00396	g15986.t1	TRUE	TRUE	TRUE	TRUE	TRUE	TRUE	FALSE	FALSE	FALSE	TRUE
Mnat_00397	g15985.t1	TRUE	TRUE	TRUE	TRUE	TRUE	TRUE	FALSE	FALSE	TRUE	TRUE
Mnat_00405	g15976.t1	TRUE	TRUE	TRUE	TRUE	FALSE	FALSE	TRUE	FALSE	FALSE	FALSE
Mnat_00406	g15972.t1	TRUE	TRUE	TRUE	TRUE	TRUE	FALSE	FALSE	FALSE	FALSE	TRUE
Mnat_00408	g2210.t1	TRUE	FALSE	FALSE	FALSE	FALSE	FALSE	TRUE	FALSE	FALSE	FALSE
Mnat_00412	g16584.t1	TRUE	TRUE	TRUE	TRUE	TRUE	TRUE	FALSE	FALSE	FALSE	TRUE
Mnat_00414	g16583.t2;g16583.t1	TRUE	FALSE	FALSE	TRUE	TRUE	TRUE	FALSE	FALSE	TRUE	TRUE
Mnat_00416	g16517.t1	TRUE	FALSE	FALSE	FALSE	FALSE	TRUE	TRUE	TRUE	FALSE	FALSE
Mnat_00419	g16579.t1	TRUE	TRUE	TRUE	TRUE	FALSE	TRUE	TRUE	TRUE	FALSE	FALSE
Mnat_00420	g16578.t1;g16578.t2;g16578.t3	TRUE	FALSE	FALSE	TRUE	TRUE	FALSE	TRUE	FALSE	TRUE	FALSE
Mnat_00421	g16577.t1	TRUE	FALSE	TRUE	FALSE	FALSE	TRUE	TRUE	TRUE	FALSE	FALSE
Mnat_00424	g16573.t1	TRUE	TRUE	TRUE	TRUE	FALSE	TRUE	FALSE	FALSE	FALSE	TRUE
Mnat_00426	g16572.t1;g16571.t1	TRUE	FALSE	FALSE	TRUE	FALSE	TRUE	FALSE	TRUE	FALSE	TRUE
Mnat_00427	g16570.t1	TRUE	FALSE	TRUE	FALSE	TRUE	TRUE	FALSE	FALSE	FALSE	TRUE
Mnat_00428	g16568.t2;g16568.t4;g16568.t3;g16568.t1	TRUE	FALSE	FALSE	TRUE	FALSE	TRUE	TRUE	TRUE	FALSE	FALSE
Mnat_00430	g16568.t5	TRUE	TRUE	TRUE	TRUE	FALSE	FALSE	TRUE	FALSE	FALSE	FALSE
Mnat_00431	g16567.t1	TRUE	TRUE	TRUE	TRUE	TRUE	FALSE	FALSE	FALSE	TRUE	TRUE
Mnat_00433	g16566.t2;g16566.t1	TRUE	FALSE	FALSE	TRUE	FALSE	FALSE	TRUE	FALSE	FALSE	FALSE
Mnat_00435	g16564.t1	TRUE	TRUE	TRUE	TRUE	TRUE	FALSE	FALSE	FALSE	TRUE	TRUE
Mnat_00438	g16562.t4;g16562.t3;g16562.t2;g16562.t1	TRUE	FALSE	FALSE	TRUE	FALSE	FALSE	TRUE	FALSE	FALSE	FALSE
Mnat_00441	g16561.t1	TRUE	TRUE	TRUE	TRUE	FALSE	TRUE	TRUE	TRUE	FALSE	FALSE
Mnat_00442	g16855.t1	TRUE	FALSE	TRUE	FALSE	FALSE	TRUE	TRUE	TRUE	FALSE	FALSE
Mnat_00443	g16560.t1	TRUE	TRUE	TRUE	TRUE	TRUE	FALSE	FALSE	FALSE	TRUE	FALSE
Mnat_00444	g16559.t2;g16559.t1	TRUE	FALSE	FALSE	TRUE	TRUE	FALSE	FALSE	FALSE	FALSE	TRUE
Mnat_00447	g16558.t1;g16558.t2	TRUE	FALSE	FALSE	TRUE	FALSE	FALSE	TRUE	FALSE	FALSE	FALSE
Mnat_00449	g16555.t1	TRUE	TRUE	TRUE	TRUE	FALSE	FALSE	TRUE	FALSE	FALSE	FALSE
Mnat_00450	g16554.t1	TRUE	TRUE	TRUE	TRUE	FALSE	FALSE	TRUE	FALSE	FALSE	FALSE
Mnat_00451	g20491.t1	TRUE	FALSE	FALSE	FALSE	FALSE	FALSE	TRUE	FALSE	FALSE	FALSE
Mnat_00452	g8536.t1	TRUE	FALSE	FALSE	FALSE	FALSE	FALSE	TRUE	FALSE	FALSE	FALSE
Mnat_00455	g16551.t1	TRUE	TRUE	TRUE	TRUE	TRUE	FALSE	FALSE	FALSE	FALSE	TRUE
Mnat_00456	g16550.t4;g16550.t1;g16550.t3;g16550.t2	TRUE	FALSE	FALSE	TRUE	FALSE	FALSE	TRUE	FALSE	FALSE	FALSE
Mnat_00457	g16549.t1	TRUE	TRUE	TRUE	TRUE	TRUE	FALSE	FALSE	FALSE	TRUE	TRUE
Mnat_00464	g16544.t1	TRUE	TRUE	TRUE	TRUE	TRUE	FALSE	FALSE	FALSE	TRUE	TRUE
Mnat_00465	g16543.t1	TRUE	TRUE	TRUE	TRUE	TRUE	FALSE	FALSE	FALSE	TRUE	TRUE
Mnat_00466	g16542.t1;g16542.t2	TRUE	FALSE	FALSE	TRUE	TRUE	FALSE	FALSE	FALSE	TRUE	TRUE
Mnat_00467	g16541.t1	TRUE	TRUE	TRUE	TRUE	TRUE	FALSE	FALSE	FALSE	TRUE	TRUE
Mnat_00468	g16540.t1	TRUE	TRUE	TRUE	TRUE	TRUE	FALSE	FALSE	FALSE	FALSE	TRUE
Mnat_00469	g16539.t1	TRUE	TRUE	TRUE	TRUE	TRUE	FALSE	FALSE	FALSE	TRUE	TRUE
Mnat_00473	g16537.t1	TRUE	TRUE	TRUE	TRUE	TRUE	FALSE	FALSE	FALSE	TRUE	TRUE
Mnat_00474	g16536.t2;g16536.t1	TRUE	FALSE	FALSE	TRUE	FALSE	TRUE	TRUE	TRUE	FALSE	FALSE
Mnat_00476	g16534.t1	TRUE	FALSE	FALSE	FALSE	TRUE	TRUE	FALSE	FALSE	FALSE	TRUE
Mnat_00479	g16530.t1	TRUE	TRUE	TRUE	TRUE	FALSE	TRUE	TRUE	TRUE	FALSE	FALSE
Mnat_00482	g16525.t1;g16525.t2	TRUE	FALSE	FALSE	TRUE	FALSE	FALSE	TRUE	FALSE	FALSE	FALSE
Mnat_00485	g16522.t2;g16522.t1	TRUE	FALSE	FALSE	TRUE	TRUE	FALSE	FALSE	FALSE	FALSE	TRUE
Mnat_00487	g16520.t1	TRUE	TRUE	TRUE	TRUE	TRUE	FALSE	FALSE	FALSE	FALSE	TRUE
Mnat_00489	g16517.t1	TRUE	FALSE	FALSE	FALSE	TRUE	TRUE	FALSE	FALSE	TRUE	TRUE
Mnat_00490	g16516.t1	TRUE	TRUE	TRUE	TRUE	FALSE	FALSE	TRUE	FALSE	FALSE	FALSE
Mnat_00492	g16515.t2;g16515.t1	TRUE	FALSE	FALSE	TRUE	FALSE	TRUE	TRUE	TRUE	FALSE	FALSE
Mnat_00493	g16514.t1	TRUE	TRUE	TRUE	TRUE	FALSE	FALSE	FALSE	FALSE	FALSE	FALSE
Mnat_00495	g16513.t1	TRUE	TRUE	TRUE	TRUE	FALSE	FALSE	TRUE	FALSE	FALSE	FALSE
Mnat_00496	g16512.t1	TRUE	TRUE	TRUE	TRUE	TRUE	FALSE	FALSE	FALSE	FALSE	TRUE
Mnat_00498	g16510.t1	TRUE	TRUE	TRUE	TRUE	TRUE	TRUE	FALSE	FALSE	TRUE	TRUE
Mnat_00501	g16507.t2;g16507.t1;g16507.t3	TRUE	FALSE	FALSE	TRUE	FALSE	TRUE	TRUE	TRUE	FALSE	FALSE
Mnat_00503	g4632.t1	TRUE	TRUE	TRUE	TRUE	TRUE	FALSE	FALSE	FALSE	TRUE	TRUE
Mnat_00506	g16517.t1	TRUE	FALSE	FALSE	FALSE	FALSE	TRUE	TRUE	TRUE	FALSE	FALSE
Mnat_00511	g4643.t1	TRUE	TRUE	TRUE	TRUE	TRUE	FALSE	FALSE	FALSE	TRUE	TRUE
Mnat_00513	g4645.t2	TRUE	TRUE	TRUE	TRUE	FALSE	FALSE	TRUE	FALSE	FALSE	FALSE
Mnat_00514	g521.t1	TRUE	TRUE	TRUE	TRUE	FALSE	FALSE	TRUE	FALSE	FALSE	FALSE
Mnat_00515	g520.t2	TRUE	TRUE	TRUE	TRUE	FALSE	TRUE	TRUE	TRUE	FALSE	FALSE
Mnat_00519	g517.t1	TRUE	TRUE	TRUE	TRUE	FALSE	FALSE	TRUE	FALSE	FALSE	FALSE
Mnat_00520	g516.t1;g516.t2	TRUE	FALSE	FALSE	TRUE	TRUE	FALSE	FALSE	FALSE	FALSE	TRUE
Mnat_00521	g13145.t1	TRUE	TRUE	TRUE	TRUE	FALSE	FALSE	TRUE	FALSE	FALSE	FALSE
Mnat_00525	g13143.t1	TRUE	TRUE	TRUE	TRUE	FALSE	FALSE	TRUE	FALSE	FALSE	FALSE
Mnat_00530	g13140.t4	TRUE	TRUE	TRUE	TRUE	FALSE	FALSE	TRUE	FALSE	FALSE	FALSE
Mnat_00533	g10933.t1;g10933.t2;g10933.t4	TRUE	FALSE	FALSE	TRUE	FALSE	FALSE	TRUE	FALSE	FALSE	FALSE
Mnat_00534	g10931.t2;g10931.t1	TRUE	FALSE	FALSE	TRUE	TRUE	FALSE	FALSE	FALSE	FALSE	TRUE
Mnat_00542	g10922.t1	TRUE	TRUE	TRUE	TRUE	FALSE	FALSE	TRUE	FALSE	FALSE	FALSE
Mnat_00544	g10919.t1	TRUE	TRUE	TRUE	TRUE	TRUE	FALSE	FALSE	FALSE	TRUE	TRUE
Mnat_00555	g10905.t1;g10905.t2	TRUE	FALSE	FALSE	TRUE	FALSE	FALSE	TRUE	FALSE	FALSE	FALSE
Mnat_00557	g10899.t1	TRUE	TRUE	TRUE	TRUE	FALSE	FALSE	TRUE	FALSE	FALSE	FALSE
Mnat_00558	g10898.t1	TRUE	TRUE	TRUE	TRUE	FALSE	FALSE	TRUE	FALSE	FALSE	FALSE
Mnat_00565	g5098.t1	TRUE	FALSE	FALSE	FALSE	FALSE	TRUE	TRUE	TRUE	FALSE	FALSE
Mnat_00570	g10880.t1	TRUE	TRUE	TRUE	TRUE	TRUE	FALSE	FALSE	FALSE	FALSE	TRUE
Mnat_00572	g10878.t1	TRUE	TRUE	TRUE	TRUE	TRUE	TRUE	FALSE	FALSE	TRUE	TRUE
Mnat_00574	g10877.t2;g10877.t1	TRUE	FALSE	FALSE	TRUE	TRUE	TRUE	FALSE	FALSE	TRUE	TRUE
Mnat_00575	g10876.t1;g10876.t2	TRUE	FALSE	FALSE	TRUE	FALSE	FALSE	TRUE	FALSE	FALSE	FALSE
Mnat_00578	g10873.t1;g10873.t2	TRUE	FALSE	FALSE	TRUE	FALSE	FALSE	TRUE	FALSE	FALSE	FALSE
Mnat_00582	g10870.t1	TRUE	TRUE	TRUE	TRUE	FALSE	FALSE	TRUE	FALSE	FALSE	FALSE
Mnat_00585	g10868.t1	TRUE	TRUE	TRUE	TRUE	TRUE	FALSE	FALSE	FALSE	TRUE	TRUE
Mnat_00587	g10867.t1;g10867.t2	TRUE	FALSE	FALSE	TRUE	FALSE	TRUE	TRUE	TRUE	FALSE	TRUE
Mnat_00593	g618.t1	TRUE	TRUE	TRUE	TRUE	FALSE	FALSE	TRUE	FALSE	FALSE	FALSE
Mnat_00596	g620.t1	TRUE	TRUE	TRUE	TRUE	FALSE	FALSE	FALSE	FALSE	FALSE	FALSE
Mnat_00597	g621.t1	TRUE	TRUE	TRUE	TRUE	TRUE	TRUE	FALSE	FALSE	TRUE	TRUE
Mnat_00599	g622.t1	TRUE	TRUE	TRUE	TRUE	FALSE	FALSE	TRUE	FALSE	FALSE	FALSE
Mnat_00609	g1886.t1	TRUE	TRUE	TRUE	TRUE	FALSE	FALSE	TRUE	FALSE	FALSE	FALSE
Mnat_00610	g1887.t1	TRUE	TRUE	TRUE	TRUE	TRUE	FALSE	FALSE	FALSE	TRUE	TRUE
Mnat_00615	g1891.t1	TRUE	TRUE	TRUE	TRUE	FALSE	FALSE	TRUE	FALSE	FALSE	FALSE
Mnat_00617	g1910.t1	TRUE	TRUE	TRUE	TRUE	FALSE	TRUE	TRUE	TRUE	FALSE	FALSE
Mnat_00624	g3206.t1	TRUE	TRUE	TRUE	TRUE	FALSE	FALSE	TRUE	FALSE	FALSE	FALSE
Mnat_00636	g22343.t1	TRUE	TRUE	TRUE	TRUE	TRUE	TRUE	FALSE	FALSE	TRUE	TRUE
Mnat_00640	g22341.t1	TRUE	TRUE	TRUE	TRUE	TRUE	TRUE	FALSE	FALSE	FALSE	TRUE
Mnat_00644	g19427.t2;g19427.t1	TRUE	FALSE	FALSE	FALSE	FALSE	FALSE	TRUE	FALSE	FALSE	FALSE
Mnat_00645	g22335.t2;g22335.t3;g22335.t4;g22335.t1	TRUE	FALSE	FALSE	TRUE	FALSE	TRUE	FALSE	TRUE	FALSE	FALSE
Mnat_00647	g22328.t1	TRUE	TRUE	TRUE	TRUE	TRUE	FALSE	FALSE	FALSE	FALSE	TRUE
Mnat_00648	g22326.t1	TRUE	TRUE	TRUE	TRUE	TRUE	TRUE	FALSE	FALSE	TRUE	TRUE
Mnat_00656	g22313.t1	TRUE	TRUE	TRUE	TRUE	TRUE	TRUE	FALSE	FALSE	TRUE	TRUE
Mnat_00661	g18464.t1	TRUE	FALSE	TRUE	FALSE	TRUE	FALSE	FALSE	FALSE	TRUE	TRUE
Mnat_00662	g22307.t1	TRUE	TRUE	TRUE	TRUE	FALSE	FALSE	TRUE	FALSE	FALSE	FALSE
Mnat_00663	g22306.t1	TRUE	TRUE	TRUE	TRUE	TRUE	FALSE	FALSE	FALSE	FALSE	TRUE
Mnat_00671	g22273.t1	TRUE	TRUE	TRUE	TRUE	TRUE	FALSE	FALSE	FALSE	TRUE	TRUE
Mnat_00673	g22271.t2;g22271.t3;g22271.t1;g22271.t4	TRUE	FALSE	FALSE	TRUE	FALSE	FALSE	TRUE	FALSE	FALSE	FALSE
Mnat_00674	g22270.t1	TRUE	TRUE	TRUE	TRUE	FALSE	FALSE	TRUE	FALSE	FALSE	FALSE
Mnat_00676	g22265.t1	TRUE	TRUE	TRUE	TRUE	TRUE	TRUE	FALSE	FALSE	TRUE	TRUE
Mnat_00684	g22253.t1;g18972.t1	TRUE	FALSE	FALSE	TRUE	FALSE	FALSE	TRUE	FALSE	FALSE	FALSE
Mnat_00685	g6243.t1	TRUE	TRUE	TRUE	TRUE	TRUE	FALSE	FALSE	FALSE	TRUE	TRUE
Mnat_00686	g6240.t1	TRUE	TRUE	TRUE	TRUE	FALSE	TRUE	TRUE	TRUE	FALSE	FALSE
Mnat_00689	g6228.t1;g6228.t2;g6229.t2;g6229.t1	TRUE	FALSE	FALSE	FALSE	FALSE	FALSE	TRUE	FALSE	FALSE	FALSE
Mnat_00690	g6228.t1;g6228.t2;g6229.t2;g6229.t1	TRUE	FALSE	FALSE	FALSE	FALSE	FALSE	TRUE	FALSE	FALSE	FALSE
Mnat_00692	g6227.t1	TRUE	FALSE	FALSE	FALSE	FALSE	FALSE	TRUE	FALSE	FALSE	FALSE
Mnat_00693	g6224.t1;g6225.t1	TRUE	FALSE	FALSE	TRUE	TRUE	FALSE	FALSE	FALSE	TRUE	TRUE
Mnat_00694	g16517.t1	TRUE	FALSE	FALSE	FALSE	FALSE	FALSE	TRUE	FALSE	FALSE	FALSE
Mnat_00695	g5151.t1	TRUE	TRUE	TRUE	TRUE	TRUE	FALSE	FALSE	FALSE	TRUE	TRUE
Mnat_00697	g5150.t1	TRUE	TRUE	TRUE	TRUE	TRUE	FALSE	FALSE	FALSE	TRUE	FALSE
Mnat_00702	g5129.t3;g5129.t1;g5129.t2	TRUE	FALSE	FALSE	TRUE	TRUE	FALSE	FALSE	FALSE	TRUE	TRUE
Mnat_00706	g5127.t1	TRUE	TRUE	TRUE	TRUE	FALSE	FALSE	TRUE	FALSE	FALSE	FALSE
Mnat_00713	g5110.t3;g5110.t1;g5110.t2	TRUE	FALSE	FALSE	TRUE	FALSE	FALSE	TRUE	FALSE	FALSE	FALSE
Mnat_00715	g5108.t1	TRUE	TRUE	TRUE	TRUE	TRUE	FALSE	FALSE	FALSE	TRUE	TRUE
Mnat_00717	g16517.t1	TRUE	FALSE	FALSE	FALSE	FALSE	FALSE	TRUE	FALSE	FALSE	FALSE
Mnat_00719	g12575.t1	TRUE	TRUE	TRUE	TRUE	FALSE	FALSE	TRUE	FALSE	FALSE	FALSE
Mnat_00721	g12572.t3	TRUE	TRUE	TRUE	TRUE	TRUE	TRUE	FALSE	FALSE	TRUE	TRUE
Mnat_00722	g12570.t1	TRUE	TRUE	TRUE	TRUE	FALSE	TRUE	TRUE	TRUE	FALSE	FALSE
Mnat_00723	g12569.t1	TRUE	TRUE	TRUE	TRUE	FALSE	FALSE	TRUE	FALSE	FALSE	FALSE
Mnat_00724	g12556.t1	TRUE	TRUE	TRUE	TRUE	FALSE	TRUE	TRUE	TRUE	FALSE	FALSE
Mnat_00725	g12555.t1;g12555.t2	TRUE	FALSE	FALSE	TRUE	TRUE	TRUE	FALSE	FALSE	FALSE	TRUE
Mnat_00739	g7323.t1	TRUE	TRUE	TRUE	TRUE	TRUE	FALSE	FALSE	FALSE	TRUE	TRUE
Mnat_00740	g7324.t2;g7324.t1;g7324.t3	TRUE	FALSE	FALSE	TRUE	TRUE	FALSE	FALSE	FALSE	TRUE	TRUE
Mnat_00741	g8175.t1	TRUE	TRUE	TRUE	TRUE	FALSE	TRUE	FALSE	FALSE	FALSE	TRUE
Mnat_00746	g4830.t1;g8172.t1;g8173.t1	TRUE	FALSE	FALSE	TRUE	TRUE	FALSE	FALSE	FALSE	FALSE	TRUE
Mnat_00748	g8169.t1	TRUE	FALSE	FALSE	FALSE	TRUE	FALSE	FALSE	FALSE	TRUE	TRUE
Mnat_00755	g6557.t1	TRUE	TRUE	TRUE	TRUE	TRUE	FALSE	FALSE	FALSE	TRUE	TRUE
Mnat_00761	g6559.t1;g6559.t2	TRUE	FALSE	FALSE	TRUE	FALSE	FALSE	TRUE	FALSE	FALSE	FALSE
Mnat_00762	g6563.t3;g6563.t2	TRUE	FALSE	FALSE	TRUE	FALSE	FALSE	TRUE	FALSE	FALSE	FALSE
Mnat_00774	g6572.t1	TRUE	TRUE	TRUE	TRUE	TRUE	TRUE	FALSE	FALSE	TRUE	TRUE
Mnat_00775	g6573.t1	TRUE	TRUE	TRUE	TRUE	TRUE	FALSE	FALSE	FALSE	TRUE	TRUE
Mnat_00778	g6575.t2;g6575.t1	TRUE	FALSE	FALSE	TRUE	FALSE	FALSE	FALSE	FALSE	FALSE	FALSE
Mnat_00780	g6576.t1;g6576.t2	TRUE	FALSE	FALSE	TRUE	FALSE	FALSE	TRUE	FALSE	FALSE	FALSE
Mnat_00784	g6578.t1	TRUE	TRUE	TRUE	TRUE	FALSE	TRUE	TRUE	TRUE	FALSE	FALSE
Mnat_00785	g6580.t1	TRUE	TRUE	TRUE	TRUE	TRUE	TRUE	FALSE	FALSE	TRUE	TRUE
Mnat_00786	g6581.t1	TRUE	TRUE	TRUE	TRUE	TRUE	FALSE	FALSE	FALSE	TRUE	TRUE
Mnat_00788	g6583.t1	TRUE	TRUE	TRUE	TRUE	FALSE	FALSE	FALSE	FALSE	FALSE	FALSE
Mnat_00794	g6589.t1	TRUE	TRUE	TRUE	TRUE	FALSE	TRUE	TRUE	TRUE	FALSE	FALSE
Mnat_00795	g6591.t2;g6591.t1	TRUE	FALSE	FALSE	TRUE	FALSE	TRUE	FALSE	TRUE	FALSE	TRUE
Mnat_00796	g6592.t1	TRUE	TRUE	TRUE	TRUE	TRUE	FALSE	FALSE	FALSE	FALSE	TRUE
Mnat_00797	g6593.t1;g6593.t2	TRUE	FALSE	FALSE	TRUE	TRUE	TRUE	FALSE	FALSE	TRUE	TRUE
Mnat_00799	g6595.t1	TRUE	TRUE	TRUE	TRUE	TRUE	TRUE	FALSE	FALSE	TRUE	TRUE
Mnat_00805	g22452.t1;g4119.t1	TRUE	FALSE	FALSE	FALSE	FALSE	FALSE	TRUE	FALSE	FALSE	FALSE
Mnat_00816	g2210.t1	TRUE	FALSE	FALSE	FALSE	FALSE	FALSE	TRUE	FALSE	FALSE	FALSE
Mnat_00818	g6601.t1	TRUE	TRUE	TRUE	TRUE	FALSE	TRUE	TRUE	TRUE	FALSE	FALSE
Mnat_00820	g6603.t1	TRUE	FALSE	FALSE	FALSE	TRUE	TRUE	FALSE	FALSE	TRUE	TRUE
Mnat_00822	g6603.t1	TRUE	FALSE	TRUE	FALSE	FALSE	TRUE	TRUE	TRUE	FALSE	FALSE
Mnat_00823	g13779.t1	TRUE	FALSE	TRUE	FALSE	TRUE	TRUE	FALSE	FALSE	TRUE	TRUE
Mnat_00825	g6609.t1;g6612.t1;g6614.t1	TRUE	FALSE	FALSE	FALSE	TRUE	FALSE	FALSE	FALSE	TRUE	TRUE
Mnat_00832	g8117.t1	TRUE	FALSE	FALSE	FALSE	FALSE	FALSE	TRUE	FALSE	FALSE	FALSE
Mnat_00839	g22452.t1;g4119.t1	TRUE	FALSE	FALSE	FALSE	FALSE	FALSE	TRUE	FALSE	FALSE	FALSE
Mnat_00840	g6613.t1	TRUE	TRUE	TRUE	TRUE	TRUE	FALSE	TRUE	FALSE	TRUE	FALSE
Mnat_00849	g7427.t1	TRUE	FALSE	FALSE	FALSE	FALSE	FALSE	TRUE	FALSE	FALSE	FALSE
Mnat_00850	g6616.t3;g6616.t1;g6616.t2	TRUE	FALSE	FALSE	TRUE	TRUE	FALSE	FALSE	FALSE	FALSE	TRUE
Mnat_00853	g6619.t2;g6619.t1	TRUE	FALSE	FALSE	TRUE	TRUE	TRUE	FALSE	FALSE	TRUE	TRUE
Mnat_00858	g6623.t1	TRUE	TRUE	TRUE	TRUE	TRUE	TRUE	FALSE	FALSE	TRUE	TRUE
Mnat_00862	g6625.t1;g6625.t2	TRUE	FALSE	FALSE	TRUE	TRUE	TRUE	FALSE	FALSE	TRUE	TRUE
Mnat_00863	g6626.t1	TRUE	TRUE	TRUE	TRUE	TRUE	FALSE	FALSE	FALSE	TRUE	TRUE
Mnat_00866	g6628.t1;g6628.t2	TRUE	FALSE	FALSE	TRUE	FALSE	FALSE	TRUE	FALSE	FALSE	FALSE
Mnat_00874	g6636.t1;g6635.t2;g6635.t1;g6638.t1	TRUE	FALSE	FALSE	FALSE	FALSE	TRUE	TRUE	TRUE	FALSE	TRUE
Mnat_00875	g6636.t1;g6635.t2;g6635.t1;g6638.t1	TRUE	FALSE	FALSE	FALSE	TRUE	TRUE	FALSE	FALSE	FALSE	TRUE
Mnat_00876	g6637.t1	TRUE	TRUE	TRUE	TRUE	FALSE	FALSE	TRUE	FALSE	FALSE	FALSE
Mnat_00878	g6639.t1	TRUE	TRUE	TRUE	TRUE	FALSE	TRUE	FALSE	TRUE	FALSE	FALSE
Mnat_00879	g22452.t1;g4119.t1	TRUE	FALSE	FALSE	FALSE	FALSE	TRUE	TRUE	TRUE	FALSE	FALSE
Mnat_00892	g6644.t1	TRUE	TRUE	TRUE	TRUE	TRUE	FALSE	TRUE	FALSE	TRUE	FALSE
Mnat_00895	g6647.t1	TRUE	TRUE	TRUE	TRUE	FALSE	FALSE	TRUE	FALSE	FALSE	FALSE
Mnat_00898	g2210.t1	TRUE	FALSE	FALSE	FALSE	FALSE	FALSE	TRUE	FALSE	FALSE	FALSE
Mnat_00899	g6649.t2;g6649.t4;g6649.t3	TRUE	FALSE	FALSE	TRUE	TRUE	FALSE	TRUE	FALSE	TRUE	FALSE
Mnat_00902	g6652.t1	TRUE	FALSE	FALSE	FALSE	FALSE	FALSE	TRUE	FALSE	FALSE	FALSE
Mnat_00904	g6653.t1	TRUE	TRUE	TRUE	TRUE	FALSE	TRUE	TRUE	TRUE	FALSE	FALSE
Mnat_00911	g6656.t2	TRUE	TRUE	TRUE	TRUE	FALSE	TRUE	FALSE	FALSE	FALSE	TRUE
Mnat_00914	g6659.t1;g6659.t2;g13237.t1	TRUE	FALSE	FALSE	TRUE	TRUE	TRUE	FALSE	FALSE	FALSE	TRUE
Mnat_00916	g6661.t1	TRUE	TRUE	TRUE	TRUE	TRUE	FALSE	FALSE	FALSE	FALSE	TRUE
Mnat_00927	g4491.t1	TRUE	TRUE	TRUE	TRUE	TRUE	FALSE	FALSE	FALSE	TRUE	TRUE
Mnat_00931	g4478.t1	TRUE	TRUE	TRUE	TRUE	TRUE	FALSE	FALSE	FALSE	TRUE	TRUE
Mnat_00932	g4477.t1;g4477.t2	TRUE	FALSE	FALSE	TRUE	FALSE	FALSE	TRUE	FALSE	FALSE	FALSE
Mnat_00933	g4476.t1;g4476.t2;g4476.t3	TRUE	FALSE	FALSE	TRUE	FALSE	FALSE	TRUE	FALSE	FALSE	FALSE
Mnat_00945	g4465.t2;g4465.t1	TRUE	FALSE	FALSE	FALSE	TRUE	TRUE	FALSE	FALSE	TRUE	TRUE
Mnat_00953	g16415.t1	TRUE	FALSE	FALSE	FALSE	FALSE	TRUE	TRUE	TRUE	FALSE	FALSE
Mnat_00955	g17519.t1	TRUE	FALSE	FALSE	FALSE	FALSE	FALSE	TRUE	FALSE	FALSE	FALSE
Mnat_00957	g2210.t1	TRUE	FALSE	FALSE	FALSE	FALSE	TRUE	TRUE	TRUE	FALSE	FALSE
Mnat_00959	g22368.t2	TRUE	TRUE	TRUE	TRUE	FALSE	FALSE	TRUE	FALSE	FALSE	FALSE
Mnat_00992	g22371.t1	TRUE	TRUE	TRUE	TRUE	FALSE	FALSE	FALSE	FALSE	FALSE	FALSE
Mnat_00994	g8528.t1	TRUE	FALSE	FALSE	FALSE	FALSE	FALSE	TRUE	FALSE	FALSE	FALSE
Mnat_00996	g22372.t1	TRUE	TRUE	TRUE	TRUE	FALSE	TRUE	FALSE	FALSE	FALSE	TRUE
Mnat_01008	g8659.t1	TRUE	FALSE	TRUE	FALSE	TRUE	FALSE	TRUE	FALSE	TRUE	FALSE
Mnat_01011	g8654.t1	TRUE	TRUE	TRUE	TRUE	FALSE	FALSE	TRUE	FALSE	FALSE	FALSE
Mnat_01014	g8651.t1;g8651.t3;g8651.t2	TRUE	FALSE	FALSE	TRUE	FALSE	FALSE	TRUE	FALSE	FALSE	FALSE
Mnat_01015	g8650.t1	TRUE	TRUE	TRUE	TRUE	TRUE	FALSE	FALSE	FALSE	TRUE	TRUE
Mnat_01018	g22861.t1	TRUE	FALSE	FALSE	FALSE	FALSE	TRUE	TRUE	TRUE	FALSE	FALSE
Mnat_01021	g8647.t1	TRUE	TRUE	TRUE	TRUE	TRUE	FALSE	FALSE	FALSE	FALSE	TRUE
Mnat_01023	g8646.t1	TRUE	TRUE	TRUE	TRUE	FALSE	FALSE	TRUE	FALSE	FALSE	FALSE
Mnat_01026	g8642.t1	TRUE	TRUE	TRUE	TRUE	FALSE	FALSE	TRUE	FALSE	FALSE	FALSE
Mnat_01027	g8641.t1	TRUE	TRUE	TRUE	TRUE	FALSE	TRUE	TRUE	TRUE	FALSE	FALSE
Mnat_01031	g8638.t2	TRUE	TRUE	TRUE	TRUE	FALSE	TRUE	TRUE	TRUE	FALSE	FALSE
Mnat_01033	g6582.t1	TRUE	FALSE	FALSE	FALSE	FALSE	FALSE	FALSE	FALSE	FALSE	FALSE
Mnat_01042	g8632.t1	TRUE	FALSE	FALSE	FALSE	TRUE	FALSE	FALSE	FALSE	FALSE	TRUE
Mnat_01045	g18958.t1	TRUE	FALSE	FALSE	FALSE	FALSE	FALSE	TRUE	FALSE	FALSE	FALSE
Mnat_01051	g16517.t1	TRUE	FALSE	FALSE	FALSE	FALSE	FALSE	TRUE	FALSE	FALSE	FALSE
Mnat_01053	g1603.t1	TRUE	TRUE	TRUE	TRUE	TRUE	FALSE	FALSE	FALSE	FALSE	TRUE
Mnat_01054	g1604.t2	TRUE	TRUE	TRUE	TRUE	TRUE	FALSE	FALSE	FALSE	TRUE	TRUE
Mnat_01055	g1605.t1	TRUE	TRUE	TRUE	TRUE	TRUE	FALSE	FALSE	FALSE	TRUE	TRUE
Mnat_01056	g1607.t1	TRUE	TRUE	TRUE	TRUE	TRUE	FALSE	FALSE	FALSE	FALSE	TRUE
Mnat_01058	g1610.t1	TRUE	TRUE	TRUE	TRUE	TRUE	FALSE	FALSE	FALSE	FALSE	TRUE
Mnat_01061	g1612.t1	TRUE	TRUE	TRUE	TRUE	TRUE	FALSE	FALSE	FALSE	TRUE	TRUE
Mnat_01062	g1613.t1;g1613.t3;g1613.t2	TRUE	FALSE	FALSE	TRUE	FALSE	FALSE	TRUE	FALSE	FALSE	FALSE
Mnat_01063	g1614.t1;g1614.t2	TRUE	FALSE	FALSE	TRUE	FALSE	TRUE	TRUE	TRUE	FALSE	FALSE
Mnat_01066	g22452.t1;g4119.t1	TRUE	FALSE	FALSE	FALSE	FALSE	FALSE	TRUE	FALSE	FALSE	FALSE
Mnat_01067	g1621.t1	TRUE	TRUE	TRUE	TRUE	FALSE	FALSE	TRUE	FALSE	FALSE	FALSE
Mnat_01068	g1622.t1	TRUE	TRUE	TRUE	TRUE	FALSE	FALSE	TRUE	FALSE	FALSE	FALSE
Mnat_01070	g225.t1	TRUE	TRUE	TRUE	TRUE	TRUE	FALSE	FALSE	FALSE	TRUE	TRUE
Mnat_01071	g224.t1	TRUE	TRUE	TRUE	TRUE	TRUE	FALSE	FALSE	FALSE	TRUE	TRUE
Mnat_01072	g223.t1	TRUE	FALSE	FALSE	FALSE	FALSE	FALSE	TRUE	FALSE	FALSE	FALSE
Mnat_01075	g221.t1	TRUE	TRUE	TRUE	TRUE	FALSE	TRUE	TRUE	TRUE	FALSE	FALSE
Mnat_01081	g212.t1	TRUE	TRUE	TRUE	TRUE	TRUE	TRUE	FALSE	FALSE	TRUE	TRUE
Mnat_01082	g211.t1	TRUE	TRUE	TRUE	TRUE	TRUE	FALSE	FALSE	FALSE	FALSE	TRUE
Mnat_01086	g205.t1;g205.t2	TRUE	FALSE	FALSE	TRUE	TRUE	FALSE	FALSE	FALSE	FALSE	TRUE
Mnat_01087	g203.t1	TRUE	TRUE	TRUE	TRUE	FALSE	FALSE	TRUE	FALSE	FALSE	FALSE
Mnat_01091	g8117.t1	TRUE	FALSE	FALSE	FALSE	FALSE	FALSE	TRUE	FALSE	FALSE	FALSE
Mnat_01092	g196.t2;g196.t1	TRUE	FALSE	FALSE	TRUE	FALSE	TRUE	TRUE	TRUE	FALSE	FALSE
Mnat_01093	g193.t1	TRUE	TRUE	TRUE	TRUE	FALSE	TRUE	TRUE	TRUE	FALSE	FALSE
Mnat_01097	g189.t1	TRUE	TRUE	TRUE	TRUE	FALSE	FALSE	TRUE	FALSE	FALSE	FALSE
Mnat_01099	g187.t1;g187.t2	TRUE	FALSE	FALSE	TRUE	FALSE	TRUE	FALSE	TRUE	FALSE	FALSE
Mnat_01100	g186.t1	TRUE	TRUE	TRUE	TRUE	FALSE	FALSE	TRUE	FALSE	FALSE	FALSE
Mnat_01101	g185.t1	TRUE	TRUE	TRUE	TRUE	FALSE	FALSE	TRUE	FALSE	FALSE	FALSE
Mnat_01103	g182.t1	TRUE	TRUE	TRUE	TRUE	FALSE	FALSE	TRUE	FALSE	FALSE	FALSE
Mnat_01107	g174.t1	TRUE	TRUE	TRUE	TRUE	FALSE	FALSE	FALSE	FALSE	FALSE	FALSE
Mnat_01110	g170.t1	TRUE	TRUE	TRUE	TRUE	FALSE	FALSE	TRUE	FALSE	FALSE	FALSE
Mnat_01111	g169.t1	TRUE	TRUE	TRUE	TRUE	FALSE	FALSE	TRUE	FALSE	FALSE	FALSE
Mnat_01113	g164.t1	TRUE	TRUE	TRUE	TRUE	FALSE	TRUE	TRUE	TRUE	FALSE	FALSE
Mnat_01115	g161.t1	TRUE	TRUE	TRUE	TRUE	FALSE	TRUE	TRUE	TRUE	FALSE	FALSE
Mnat_01116	g18984.t2;g18984.t3;g18984.t1;g18984.t7;g18984.t4	TRUE	FALSE	FALSE	TRUE	FALSE	FALSE	TRUE	FALSE	FALSE	FALSE
Mnat_01117	g18984.t5;g18984.t6	TRUE	FALSE	FALSE	TRUE	FALSE	FALSE	TRUE	FALSE	FALSE	FALSE
Mnat_01118	g18983.t3	TRUE	TRUE	TRUE	TRUE	FALSE	FALSE	TRUE	FALSE	FALSE	FALSE
Mnat_01119	g18982.t1	TRUE	TRUE	TRUE	TRUE	TRUE	FALSE	FALSE	FALSE	FALSE	TRUE
Mnat_01120	g18981.t1	TRUE	TRUE	TRUE	TRUE	FALSE	TRUE	TRUE	TRUE	FALSE	FALSE
Mnat_01121	g6862.t1;g18978.t1;g6862.t2;g18978.t2	TRUE	FALSE	FALSE	TRUE	FALSE	TRUE	TRUE	TRUE	FALSE	FALSE
Mnat_01122	g18976.t3;g18976.t2;g18976.t1;g6860.t2;g6860.t1;g6860.t3	TRUE	FALSE	FALSE	TRUE	FALSE	FALSE	TRUE	FALSE	FALSE	FALSE
Mnat_01123	g15166.t1	TRUE	FALSE	FALSE	FALSE	FALSE	FALSE	TRUE	FALSE	FALSE	FALSE
Mnat_01130	g6850.t2;g6850.t1	TRUE	FALSE	FALSE	TRUE	FALSE	FALSE	TRUE	FALSE	FALSE	FALSE
Mnat_01133	g6847.t1;g6847.t2	TRUE	FALSE	FALSE	TRUE	FALSE	FALSE	TRUE	FALSE	FALSE	FALSE
Mnat_01134	g6846.t1	TRUE	TRUE	TRUE	TRUE	FALSE	FALSE	TRUE	FALSE	FALSE	FALSE
Mnat_01136	g14158.t1	TRUE	TRUE	TRUE	TRUE	TRUE	FALSE	TRUE	FALSE	TRUE	FALSE
Mnat_01137	g14160.t1	TRUE	TRUE	TRUE	TRUE	TRUE	TRUE	FALSE	FALSE	TRUE	TRUE
Mnat_01138	g14163.t1	TRUE	TRUE	TRUE	TRUE	TRUE	FALSE	FALSE	FALSE	FALSE	TRUE
Mnat_01139	g14165.t2	TRUE	TRUE	TRUE	TRUE	FALSE	FALSE	TRUE	FALSE	FALSE	FALSE
Mnat_01141	g14166.t1	TRUE	TRUE	TRUE	TRUE	FALSE	TRUE	FALSE	FALSE	FALSE	TRUE
Mnat_01143	g14168.t1	TRUE	TRUE	TRUE	TRUE	TRUE	FALSE	FALSE	FALSE	FALSE	TRUE
Mnat_01147	g14172.t2;g14172.t3;g14172.t1	TRUE	FALSE	FALSE	TRUE	FALSE	FALSE	TRUE	FALSE	FALSE	FALSE
Mnat_01148	g14174.t1	TRUE	FALSE	TRUE	FALSE	FALSE	TRUE	TRUE	TRUE	FALSE	FALSE
Mnat_01151	g14178.t1	TRUE	TRUE	TRUE	TRUE	TRUE	FALSE	FALSE	FALSE	TRUE	TRUE
Mnat_01152	g14179.t1	TRUE	TRUE	TRUE	TRUE	TRUE	FALSE	FALSE	FALSE	FALSE	TRUE
Mnat_01156	g14181.t1	TRUE	TRUE	TRUE	TRUE	TRUE	TRUE	FALSE	FALSE	TRUE	TRUE
Mnat_01157	g14182.t1	TRUE	TRUE	TRUE	TRUE	TRUE	FALSE	FALSE	FALSE	TRUE	TRUE
Mnat_01158	g14183.t1	TRUE	TRUE	TRUE	TRUE	TRUE	FALSE	FALSE	FALSE	TRUE	TRUE
Mnat_01163	g14187.t1;g14187.t2	TRUE	FALSE	FALSE	TRUE	FALSE	TRUE	TRUE	TRUE	FALSE	FALSE
Mnat_01164	g14188.t1	TRUE	TRUE	TRUE	TRUE	TRUE	FALSE	FALSE	FALSE	TRUE	TRUE
Mnat_01165	g14189.t2;g14189.t1	TRUE	FALSE	FALSE	TRUE	TRUE	FALSE	TRUE	FALSE	TRUE	TRUE
Mnat_01166	g14190.t2;g14190.t3;g14190.t4;g14190.t1	TRUE	FALSE	FALSE	TRUE	TRUE	FALSE	FALSE	FALSE	FALSE	TRUE
Mnat_01167	g14191.t2	TRUE	TRUE	TRUE	TRUE	TRUE	FALSE	FALSE	FALSE	FALSE	TRUE
Mnat_01168	g14192.t1	TRUE	TRUE	TRUE	TRUE	TRUE	FALSE	TRUE	FALSE	TRUE	FALSE
Mnat_01169	g14193.t1	TRUE	TRUE	TRUE	TRUE	TRUE	TRUE	FALSE	FALSE	TRUE	TRUE
Mnat_01171	g14195.t1	TRUE	TRUE	TRUE	TRUE	TRUE	FALSE	FALSE	FALSE	TRUE	TRUE
Mnat_01175	g14199.t3;g14199.t4;g14199.t7;g14199.t6;g14199.t1;g14199.t2;g14199.t5	TRUE	FALSE	FALSE	TRUE	FALSE	FALSE	TRUE	FALSE	FALSE	FALSE
Mnat_01177	g14201.t1	TRUE	TRUE	TRUE	TRUE	FALSE	FALSE	TRUE	FALSE	FALSE	FALSE
Mnat_01181	g14210.t1	TRUE	TRUE	TRUE	TRUE	FALSE	FALSE	TRUE	FALSE	FALSE	FALSE
Mnat_01186	g23047.t1	TRUE	FALSE	TRUE	FALSE	FALSE	TRUE	TRUE	TRUE	FALSE	FALSE
Mnat_01189	g23049.t2;g23049.t1	TRUE	FALSE	FALSE	TRUE	TRUE	FALSE	TRUE	FALSE	TRUE	FALSE
Mnat_01192	g23050.t2;g23050.t1	TRUE	FALSE	FALSE	TRUE	FALSE	FALSE	TRUE	FALSE	FALSE	FALSE
Mnat_01196	g23055.t1	TRUE	TRUE	TRUE	TRUE	FALSE	FALSE	TRUE	FALSE	FALSE	FALSE
Mnat_01200	g20418.t1;g23059.t1	TRUE	FALSE	FALSE	TRUE	TRUE	TRUE	FALSE	FALSE	TRUE	TRUE
Mnat_01203	g8384.t1	TRUE	FALSE	FALSE	FALSE	FALSE	FALSE	TRUE	FALSE	FALSE	FALSE
Mnat_01205	g23062.t1;g20421.t1	TRUE	FALSE	FALSE	TRUE	TRUE	FALSE	FALSE	FALSE	TRUE	TRUE
Mnat_01207	g23063.t1;g20422.t1	TRUE	FALSE	FALSE	TRUE	TRUE	FALSE	FALSE	FALSE	FALSE	TRUE
Mnat_01209	g19471.t1	TRUE	TRUE	TRUE	TRUE	FALSE	FALSE	TRUE	FALSE	FALSE	FALSE
Mnat_01228	g8117.t1	TRUE	FALSE	FALSE	FALSE	FALSE	TRUE	TRUE	TRUE	FALSE	FALSE
Mnat_01232	g16708.t1	TRUE	FALSE	FALSE	FALSE	FALSE	TRUE	TRUE	TRUE	FALSE	FALSE
Mnat_01236	g8536.t1	TRUE	FALSE	FALSE	FALSE	FALSE	TRUE	TRUE	TRUE	FALSE	FALSE
Mnat_01238	g16517.t1	TRUE	FALSE	FALSE	FALSE	FALSE	FALSE	TRUE	FALSE	FALSE	FALSE
Mnat_01240	g22452.t1;g4119.t1	TRUE	FALSE	FALSE	FALSE	FALSE	FALSE	TRUE	FALSE	FALSE	FALSE
Mnat_01247	g13575.t1;g13575.t2	TRUE	FALSE	FALSE	TRUE	FALSE	FALSE	TRUE	FALSE	FALSE	FALSE
Mnat_01251	g13562.t1;g13562.t2;g13562.t3	TRUE	FALSE	FALSE	TRUE	FALSE	FALSE	TRUE	FALSE	FALSE	FALSE
Mnat_01257	g13548.t1	TRUE	TRUE	TRUE	TRUE	TRUE	FALSE	FALSE	FALSE	FALSE	TRUE
Mnat_01258	g13547.t1	TRUE	TRUE	TRUE	TRUE	TRUE	FALSE	FALSE	FALSE	TRUE	TRUE
Mnat_01259	g23179.t1	TRUE	FALSE	FALSE	FALSE	FALSE	FALSE	TRUE	FALSE	FALSE	FALSE
Mnat_01261	g13545.t4;g13545.t1;g13545.t3;g13545.t2	TRUE	FALSE	FALSE	TRUE	FALSE	FALSE	TRUE	FALSE	FALSE	FALSE
Mnat_01262	g2210.t1	TRUE	FALSE	FALSE	FALSE	FALSE	FALSE	TRUE	FALSE	FALSE	FALSE
Mnat_01264	g5098.t1	TRUE	FALSE	FALSE	FALSE	FALSE	FALSE	TRUE	FALSE	FALSE	FALSE
Mnat_01266	g11131.t1	TRUE	TRUE	TRUE	TRUE	FALSE	TRUE	TRUE	TRUE	FALSE	FALSE
Mnat_01272	g11138.t1	TRUE	TRUE	TRUE	TRUE	TRUE	FALSE	FALSE	FALSE	TRUE	TRUE
Mnat_01273	g11140.t2;g11140.t1	TRUE	FALSE	FALSE	TRUE	TRUE	TRUE	FALSE	FALSE	TRUE	TRUE
Mnat_01274	g11142.t1	TRUE	FALSE	TRUE	FALSE	FALSE	TRUE	FALSE	FALSE	FALSE	TRUE
Mnat_01275	g11142.t1	TRUE	FALSE	FALSE	FALSE	TRUE	TRUE	FALSE	FALSE	FALSE	TRUE
Mnat_01277	g11143.t1;g11143.t2	TRUE	FALSE	FALSE	TRUE	TRUE	TRUE	FALSE	FALSE	TRUE	TRUE
Mnat_01278	g11144.t1	TRUE	TRUE	TRUE	TRUE	FALSE	FALSE	TRUE	FALSE	FALSE	FALSE
Mnat_01279	g11145.t1	TRUE	TRUE	TRUE	TRUE	FALSE	FALSE	TRUE	FALSE	FALSE	FALSE
Mnat_01280	g11146.t1	TRUE	TRUE	TRUE	TRUE	FALSE	FALSE	TRUE	FALSE	FALSE	FALSE
Mnat_01281	g11147.t1	TRUE	FALSE	FALSE	FALSE	FALSE	FALSE	TRUE	FALSE	FALSE	FALSE
Mnat_01282	g11148.t1	TRUE	FALSE	FALSE	FALSE	FALSE	FALSE	TRUE	FALSE	FALSE	FALSE
Mnat_01284	g11153.t1	TRUE	TRUE	TRUE	TRUE	FALSE	FALSE	TRUE	FALSE	FALSE	FALSE
Mnat_01286	g18888.t1	TRUE	FALSE	FALSE	FALSE	TRUE	FALSE	FALSE	FALSE	TRUE	TRUE
Mnat_01287	g7978.t1	TRUE	TRUE	TRUE	TRUE	TRUE	FALSE	FALSE	FALSE	FALSE	TRUE
Mnat_01288	g7977.t1	TRUE	TRUE	TRUE	TRUE	FALSE	FALSE	TRUE	FALSE	FALSE	FALSE
Mnat_01291	g7973.t1	TRUE	FALSE	FALSE	FALSE	FALSE	FALSE	TRUE	FALSE	FALSE	FALSE
Mnat_01292	g7972.t1	TRUE	TRUE	TRUE	TRUE	FALSE	TRUE	TRUE	TRUE	FALSE	FALSE
Mnat_01293	g7971.t1	TRUE	TRUE	TRUE	TRUE	FALSE	FALSE	TRUE	FALSE	FALSE	FALSE
Mnat_01297	g11548.t1	TRUE	TRUE	TRUE	TRUE	FALSE	TRUE	FALSE	TRUE	FALSE	TRUE
Mnat_01305	g11541.t1	TRUE	TRUE	TRUE	TRUE	FALSE	FALSE	TRUE	FALSE	FALSE	FALSE
Mnat_01307	g11538.t1	TRUE	TRUE	TRUE	TRUE	FALSE	FALSE	TRUE	FALSE	FALSE	FALSE
Mnat_01308	g11537.t1	TRUE	TRUE	TRUE	TRUE	TRUE	FALSE	FALSE	FALSE	TRUE	TRUE
Mnat_01309	g11536.t1	TRUE	TRUE	TRUE	TRUE	FALSE	TRUE	TRUE	TRUE	FALSE	FALSE
Mnat_01311	g11531.t1;g11531.t2	TRUE	FALSE	FALSE	FALSE	FALSE	FALSE	TRUE	FALSE	FALSE	FALSE
Mnat_01313	g11530.t1	TRUE	TRUE	TRUE	TRUE	FALSE	FALSE	FALSE	FALSE	FALSE	FALSE
Mnat_01314	g11529.t1	TRUE	TRUE	TRUE	TRUE	TRUE	TRUE	FALSE	FALSE	TRUE	TRUE
Mnat_01315	g11528.t1;g11528.t2;g11528.t3	TRUE	FALSE	FALSE	TRUE	TRUE	TRUE	FALSE	FALSE	TRUE	TRUE
Mnat_01317	g11527.t1	TRUE	TRUE	TRUE	TRUE	FALSE	FALSE	TRUE	FALSE	FALSE	FALSE
Mnat_01319	g11526.t2;g11526.t1	TRUE	FALSE	FALSE	TRUE	FALSE	TRUE	TRUE	TRUE	FALSE	FALSE
Mnat_01321	g11523.t1	TRUE	TRUE	TRUE	TRUE	TRUE	FALSE	FALSE	FALSE	TRUE	TRUE
Mnat_01328	g11512.t2;g11512.t4	TRUE	FALSE	FALSE	TRUE	FALSE	FALSE	TRUE	FALSE	FALSE	FALSE
Mnat_01333	g11505.t1	TRUE	TRUE	TRUE	TRUE	FALSE	FALSE	TRUE	FALSE	FALSE	FALSE
Mnat_01334	g20491.t1	TRUE	FALSE	FALSE	FALSE	FALSE	TRUE	TRUE	TRUE	FALSE	FALSE
Mnat_01336	g11500.t1	TRUE	FALSE	TRUE	FALSE	FALSE	FALSE	TRUE	FALSE	FALSE	FALSE
Mnat_01339	g11498.t1;g11498.t2	TRUE	FALSE	FALSE	TRUE	FALSE	TRUE	TRUE	TRUE	FALSE	FALSE
Mnat_01340	g11497.t1	TRUE	TRUE	TRUE	TRUE	TRUE	FALSE	FALSE	FALSE	FALSE	TRUE
Mnat_01341	g11496.t1	TRUE	TRUE	TRUE	TRUE	TRUE	FALSE	FALSE	FALSE	TRUE	TRUE
Mnat_01343	g11493.t1;g11493.t2	TRUE	FALSE	FALSE	TRUE	FALSE	FALSE	TRUE	FALSE	FALSE	FALSE
Mnat_01346	g11487.t1	TRUE	TRUE	TRUE	TRUE	FALSE	FALSE	TRUE	FALSE	FALSE	FALSE
Mnat_01348	g11485.t1	TRUE	TRUE	TRUE	TRUE	TRUE	FALSE	FALSE	FALSE	FALSE	TRUE
Mnat_01349	g11484.t1	TRUE	TRUE	TRUE	TRUE	TRUE	FALSE	FALSE	FALSE	TRUE	TRUE
Mnat_01352	g11482.t3;g11482.t5;g11482.t4;g11482.t1;g11482.t2	TRUE	FALSE	FALSE	TRUE	FALSE	FALSE	TRUE	FALSE	FALSE	FALSE
Mnat_01354	g11480.t4;g11480.t3;g11480.t1	TRUE	FALSE	FALSE	TRUE	TRUE	FALSE	FALSE	FALSE	TRUE	TRUE
Mnat_01355	g11478.t1	TRUE	TRUE	TRUE	TRUE	TRUE	TRUE	FALSE	FALSE	TRUE	TRUE
Mnat_01357	g11476.t1	TRUE	TRUE	TRUE	TRUE	TRUE	FALSE	FALSE	FALSE	TRUE	TRUE
Mnat_01358	g11475.t1	TRUE	TRUE	TRUE	TRUE	FALSE	FALSE	TRUE	FALSE	FALSE	FALSE
Mnat_01361	g11470.t2;g11470.t1	TRUE	FALSE	FALSE	TRUE	TRUE	TRUE	FALSE	FALSE	TRUE	TRUE
Mnat_01364	g11468.t1	TRUE	TRUE	TRUE	TRUE	FALSE	FALSE	FALSE	FALSE	FALSE	FALSE
Mnat_01368	g11462.t1	TRUE	TRUE	TRUE	TRUE	TRUE	FALSE	FALSE	FALSE	TRUE	TRUE
Mnat_01369	g11461.t1	TRUE	TRUE	TRUE	TRUE	TRUE	FALSE	FALSE	FALSE	FALSE	TRUE
Mnat_01370	g11460.t1	TRUE	TRUE	TRUE	TRUE	FALSE	FALSE	TRUE	FALSE	FALSE	FALSE
Mnat_01371	g11459.t1	TRUE	TRUE	TRUE	TRUE	TRUE	FALSE	FALSE	FALSE	TRUE	TRUE
Mnat_01377	g11454.t3;g11454.t2;g11454.t1	TRUE	FALSE	FALSE	TRUE	FALSE	FALSE	TRUE	FALSE	FALSE	FALSE
Mnat_01378	g17323.t1;g11453.t1;g11453.t2	TRUE	FALSE	FALSE	TRUE	TRUE	FALSE	FALSE	FALSE	TRUE	TRUE
Mnat_01379	g22861.t1	TRUE	FALSE	FALSE	FALSE	FALSE	TRUE	TRUE	TRUE	FALSE	FALSE
Mnat_01380	g11452.t1;g11452.t3;g11452.t4;g11452.t2	TRUE	FALSE	FALSE	TRUE	TRUE	FALSE	FALSE	FALSE	TRUE	TRUE
Mnat_01392	g15222.t2;g15222.t1	TRUE	FALSE	FALSE	TRUE	FALSE	FALSE	TRUE	FALSE	FALSE	FALSE
Mnat_01394	g15221.t1	TRUE	FALSE	FALSE	FALSE	FALSE	FALSE	TRUE	FALSE	FALSE	FALSE
Mnat_01396	g15217.t2	TRUE	TRUE	TRUE	TRUE	TRUE	TRUE	FALSE	FALSE	TRUE	TRUE
Mnat_01403	g15196.t1	TRUE	TRUE	TRUE	TRUE	TRUE	FALSE	FALSE	FALSE	FALSE	TRUE
Mnat_01404	g15194.t1;g15195.t1;g15195.t2;g10556.t1;g10028.t1;g10053.t1;g10058.t1;g6811.t1;g10020.t1;g10016.t1;g10046.t1;g10040.t1;g21475.t1;g10079.t1;g10093.t1;g10098.t1;g6809.t1;g6806.t1;g10124.t1;g10085.t1;g10032.t1;g10034.t2;g10037.t1;g10034.t1;g10069.t1	TRUE	FALSE	FALSE	TRUE	TRUE	TRUE	FALSE	FALSE	TRUE	TRUE
Mnat_01405	g2813.t1;g9799.t1;g10050.t1;g10070.t1	TRUE	FALSE	FALSE	TRUE	TRUE	FALSE	FALSE	FALSE	TRUE	TRUE
Mnat_01410	g15178.t2	TRUE	TRUE	TRUE	TRUE	TRUE	FALSE	FALSE	FALSE	TRUE	TRUE
Mnat_01413	g15174.t1	TRUE	TRUE	TRUE	TRUE	TRUE	FALSE	TRUE	FALSE	TRUE	TRUE
Mnat_01418	g4073.t2;g4073.t1	TRUE	FALSE	FALSE	TRUE	TRUE	FALSE	FALSE	FALSE	TRUE	TRUE
Mnat_01420	g4070.t1	TRUE	TRUE	TRUE	TRUE	FALSE	TRUE	TRUE	TRUE	FALSE	FALSE
Mnat_01421	g4067.t1	TRUE	TRUE	TRUE	TRUE	TRUE	TRUE	FALSE	FALSE	FALSE	TRUE
Mnat_01423	g1211.t4	TRUE	TRUE	TRUE	TRUE	FALSE	TRUE	FALSE	FALSE	FALSE	TRUE
Mnat_01427	g8117.t1	TRUE	FALSE	FALSE	FALSE	FALSE	TRUE	TRUE	TRUE	FALSE	FALSE
Mnat_01430	g4060.t1;g4060.t2	TRUE	FALSE	FALSE	TRUE	TRUE	FALSE	FALSE	FALSE	TRUE	TRUE
Mnat_01434	g16845.t1	TRUE	FALSE	FALSE	FALSE	TRUE	FALSE	FALSE	FALSE	TRUE	TRUE
Mnat_01440	g20242.t1	TRUE	FALSE	TRUE	FALSE	FALSE	FALSE	TRUE	FALSE	FALSE	FALSE
Mnat_01443	g20247.t1	TRUE	TRUE	TRUE	TRUE	FALSE	FALSE	TRUE	FALSE	FALSE	FALSE
Mnat_01446	g20252.t1	TRUE	TRUE	TRUE	TRUE	FALSE	FALSE	TRUE	FALSE	FALSE	FALSE
Mnat_01447	g16517.t1	TRUE	FALSE	FALSE	FALSE	FALSE	FALSE	TRUE	FALSE	FALSE	FALSE
Mnat_01449	g20253.t1	TRUE	TRUE	TRUE	TRUE	FALSE	FALSE	TRUE	FALSE	FALSE	FALSE
Mnat_01450	g20254.t1	TRUE	TRUE	TRUE	TRUE	TRUE	FALSE	FALSE	FALSE	TRUE	TRUE
Mnat_01459	g20264.t1	TRUE	FALSE	FALSE	FALSE	TRUE	TRUE	FALSE	FALSE	TRUE	TRUE
Mnat_01460	g20265.t3;g20265.t1;g20265.t2	TRUE	FALSE	FALSE	TRUE	FALSE	FALSE	TRUE	FALSE	FALSE	FALSE
Mnat_01464	g8333.t1	TRUE	TRUE	TRUE	TRUE	FALSE	FALSE	TRUE	FALSE	FALSE	FALSE
Mnat_01466	g8336.t1	TRUE	TRUE	TRUE	TRUE	TRUE	FALSE	FALSE	FALSE	TRUE	TRUE
Mnat_01467	g8338.t1	TRUE	TRUE	TRUE	TRUE	FALSE	FALSE	TRUE	FALSE	FALSE	FALSE
Mnat_01469	g8341.t2	TRUE	TRUE	TRUE	TRUE	FALSE	FALSE	TRUE	FALSE	FALSE	FALSE
Mnat_01472	g2210.t1	TRUE	FALSE	FALSE	FALSE	FALSE	FALSE	TRUE	FALSE	FALSE	FALSE
Mnat_01475	g8351.t1	TRUE	TRUE	TRUE	TRUE	FALSE	FALSE	TRUE	FALSE	FALSE	FALSE
Mnat_01483	g2470.t2;g2470.t1	TRUE	FALSE	FALSE	TRUE	FALSE	TRUE	FALSE	TRUE	FALSE	TRUE
Mnat_01484	g2469.t1	TRUE	TRUE	TRUE	TRUE	FALSE	FALSE	TRUE	FALSE	FALSE	FALSE
Mnat_01485	g3466.t1	TRUE	FALSE	FALSE	FALSE	FALSE	FALSE	TRUE	FALSE	FALSE	FALSE
Mnat_01486	g15882.t1	TRUE	TRUE	TRUE	TRUE	FALSE	FALSE	TRUE	FALSE	FALSE	FALSE
Mnat_01487	g15883.t1	TRUE	TRUE	TRUE	TRUE	TRUE	FALSE	FALSE	FALSE	FALSE	TRUE
Mnat_01489	g15886.t1	TRUE	TRUE	TRUE	TRUE	TRUE	TRUE	FALSE	FALSE	TRUE	TRUE
Mnat_01490	g15887.t1;g15887.t2;g15887.t4;g15887.t3	TRUE	FALSE	FALSE	TRUE	FALSE	FALSE	TRUE	FALSE	FALSE	FALSE
Mnat_01491	g15888.t3;g15888.t2;g15888.t1	TRUE	FALSE	FALSE	TRUE	FALSE	FALSE	TRUE	FALSE	FALSE	FALSE
Mnat_01492	g15889.t1	TRUE	TRUE	TRUE	TRUE	FALSE	FALSE	FALSE	FALSE	FALSE	FALSE
Mnat_01494	g15892.t4;g15892.t1;g15892.t3;g15892.t2	TRUE	FALSE	FALSE	TRUE	TRUE	TRUE	FALSE	FALSE	FALSE	TRUE
Mnat_01500	g15901.t2	TRUE	TRUE	TRUE	TRUE	TRUE	TRUE	FALSE	FALSE	TRUE	TRUE
Mnat_01504	g15907.t2;g15907.t1	TRUE	FALSE	FALSE	TRUE	FALSE	TRUE	TRUE	TRUE	FALSE	FALSE
Mnat_01505	g15910.t1	TRUE	TRUE	TRUE	TRUE	FALSE	FALSE	TRUE	FALSE	FALSE	FALSE
Mnat_01509	g15911.t1	TRUE	TRUE	TRUE	TRUE	FALSE	TRUE	TRUE	TRUE	FALSE	FALSE
Mnat_01510	g15912.t2;g15912.t1	TRUE	FALSE	FALSE	TRUE	TRUE	FALSE	FALSE	FALSE	TRUE	TRUE
Mnat_01511	g15913.t1	TRUE	TRUE	TRUE	TRUE	TRUE	FALSE	FALSE	FALSE	FALSE	TRUE
Mnat_01515	g15917.t1	TRUE	TRUE	TRUE	TRUE	FALSE	TRUE	TRUE	TRUE	FALSE	FALSE
Mnat_01520	g15926.t3	TRUE	TRUE	TRUE	TRUE	FALSE	FALSE	TRUE	FALSE	FALSE	FALSE
Mnat_01521	g15926.t2;g15926.t4;g15926.t1	TRUE	FALSE	FALSE	TRUE	FALSE	FALSE	TRUE	FALSE	FALSE	FALSE
Mnat_01523	g15927.t1	TRUE	TRUE	TRUE	TRUE	TRUE	FALSE	FALSE	FALSE	TRUE	TRUE
Mnat_01525	g15930.t1;g15928.t1;g15928.t2	TRUE	FALSE	FALSE	TRUE	TRUE	FALSE	FALSE	FALSE	FALSE	TRUE
Mnat_01526	g15931.t1	TRUE	TRUE	TRUE	TRUE	TRUE	FALSE	FALSE	FALSE	TRUE	TRUE
Mnat_01527	g15932.t1	TRUE	TRUE	TRUE	TRUE	TRUE	FALSE	TRUE	FALSE	TRUE	TRUE
Mnat_01529	g15935.t1	TRUE	TRUE	TRUE	TRUE	TRUE	FALSE	FALSE	FALSE	FALSE	TRUE
Mnat_01530	g15936.t1	TRUE	TRUE	TRUE	TRUE	TRUE	FALSE	FALSE	FALSE	TRUE	TRUE
Mnat_01534	g9401.t1	TRUE	FALSE	FALSE	FALSE	TRUE	FALSE	TRUE	FALSE	TRUE	FALSE
Mnat_01535	g9401.t1	TRUE	FALSE	FALSE	FALSE	TRUE	FALSE	FALSE	FALSE	TRUE	TRUE
Mnat_01541	g6582.t1	TRUE	FALSE	FALSE	FALSE	FALSE	TRUE	FALSE	TRUE	FALSE	FALSE
Mnat_01542	g20100.t2;g20100.t1	TRUE	FALSE	FALSE	TRUE	TRUE	FALSE	TRUE	FALSE	TRUE	FALSE
Mnat_01544	g20099.t2;g20099.t1	TRUE	FALSE	FALSE	TRUE	FALSE	TRUE	TRUE	TRUE	FALSE	FALSE
Mnat_01547	g20093.t1;g20093.t2	TRUE	FALSE	FALSE	TRUE	FALSE	TRUE	TRUE	TRUE	FALSE	FALSE
Mnat_01549	g20089.t3	TRUE	TRUE	TRUE	TRUE	TRUE	TRUE	FALSE	FALSE	TRUE	TRUE
Mnat_01552	g15145.t1	TRUE	TRUE	TRUE	TRUE	FALSE	FALSE	TRUE	FALSE	FALSE	FALSE
Mnat_01555	g15143.t1	TRUE	TRUE	TRUE	TRUE	FALSE	FALSE	TRUE	FALSE	FALSE	FALSE
Mnat_01557	g15142.t1	TRUE	TRUE	TRUE	TRUE	TRUE	FALSE	FALSE	FALSE	FALSE	TRUE
Mnat_01559	g15140.t2;g15140.t1	TRUE	FALSE	FALSE	TRUE	TRUE	FALSE	FALSE	FALSE	TRUE	TRUE
Mnat_01561	g22452.t1;g4119.t1	TRUE	FALSE	FALSE	FALSE	FALSE	TRUE	TRUE	TRUE	FALSE	FALSE
Mnat_01563	g15137.t1	TRUE	TRUE	TRUE	TRUE	TRUE	TRUE	FALSE	TRUE	FALSE	TRUE
Mnat_01565	g15110.t1	TRUE	TRUE	TRUE	TRUE	TRUE	FALSE	FALSE	FALSE	TRUE	TRUE
Mnat_01568	g15112.t1	TRUE	TRUE	TRUE	TRUE	FALSE	FALSE	TRUE	FALSE	FALSE	FALSE
Mnat_01569	g15113.t1	TRUE	TRUE	TRUE	TRUE	TRUE	FALSE	FALSE	FALSE	TRUE	TRUE
Mnat_01570	g15114.t2;g15114.t1	TRUE	FALSE	FALSE	TRUE	TRUE	TRUE	FALSE	FALSE	TRUE	TRUE
Mnat_01576	g15122.t1	TRUE	TRUE	TRUE	TRUE	FALSE	TRUE	TRUE	TRUE	FALSE	FALSE
Mnat_01581	g15124.t1	TRUE	TRUE	TRUE	TRUE	FALSE	FALSE	TRUE	FALSE	FALSE	FALSE
Mnat_01589	g17519.t1	TRUE	FALSE	FALSE	FALSE	FALSE	FALSE	TRUE	FALSE	FALSE	FALSE
Mnat_01592	g15130.t1	TRUE	TRUE	TRUE	TRUE	FALSE	TRUE	TRUE	TRUE	FALSE	FALSE
Mnat_01596	g15131.t1	TRUE	TRUE	TRUE	TRUE	TRUE	TRUE	FALSE	FALSE	TRUE	TRUE
Mnat_01597	g15132.t1	TRUE	TRUE	TRUE	TRUE	TRUE	FALSE	FALSE	FALSE	TRUE	TRUE
Mnat_01605	g15135.t1	TRUE	TRUE	TRUE	TRUE	FALSE	FALSE	TRUE	FALSE	FALSE	FALSE
Mnat_01607	g18712.t1;g18712.t2	TRUE	FALSE	FALSE	TRUE	FALSE	FALSE	TRUE	FALSE	FALSE	FALSE
Mnat_01608	g18713.t1	TRUE	TRUE	TRUE	TRUE	FALSE	FALSE	TRUE	FALSE	FALSE	FALSE
Mnat_01609	g18720.t1	TRUE	TRUE	TRUE	TRUE	FALSE	FALSE	TRUE	FALSE	FALSE	FALSE
Mnat_01611	g18726.t3;g18726.t1;g18726.t2	TRUE	FALSE	FALSE	TRUE	FALSE	FALSE	TRUE	FALSE	FALSE	FALSE
Mnat_01612	g9503.t1;g9503.t2	TRUE	FALSE	FALSE	TRUE	TRUE	FALSE	FALSE	FALSE	FALSE	TRUE
Mnat_01613	g9502.t1	TRUE	TRUE	TRUE	TRUE	TRUE	FALSE	FALSE	FALSE	FALSE	TRUE
Mnat_01614	g9501.t1	TRUE	TRUE	TRUE	TRUE	TRUE	FALSE	FALSE	FALSE	TRUE	TRUE
Mnat_01615	g9500.t1	TRUE	TRUE	TRUE	TRUE	TRUE	FALSE	FALSE	FALSE	FALSE	TRUE
Mnat_01616	g5098.t1	TRUE	FALSE	FALSE	FALSE	FALSE	FALSE	TRUE	FALSE	FALSE	FALSE
Mnat_01620	g9498.t1	TRUE	TRUE	TRUE	TRUE	TRUE	TRUE	FALSE	FALSE	TRUE	TRUE
Mnat_01625	g9496.t1	TRUE	TRUE	TRUE	TRUE	TRUE	TRUE	FALSE	FALSE	TRUE	TRUE
Mnat_01626	g9495.t1;g9495.t2	TRUE	FALSE	FALSE	TRUE	FALSE	FALSE	TRUE	FALSE	FALSE	FALSE
Mnat_01628	g9494.t1	TRUE	TRUE	TRUE	TRUE	TRUE	FALSE	FALSE	FALSE	TRUE	TRUE
Mnat_01633	g9485.t1	TRUE	TRUE	TRUE	TRUE	FALSE	TRUE	FALSE	FALSE	FALSE	TRUE
Mnat_01639	g9481.t1	TRUE	TRUE	TRUE	TRUE	TRUE	FALSE	FALSE	FALSE	TRUE	FALSE
Mnat_01645	g20329.t1	TRUE	TRUE	TRUE	TRUE	FALSE	FALSE	TRUE	FALSE	FALSE	FALSE
Mnat_01646	g19266.t1;g1049.t1;g1048.t1;g16762.t1;g20330.t1;g20330.t2	TRUE	FALSE	FALSE	TRUE	TRUE	FALSE	FALSE	FALSE	FALSE	TRUE
Mnat_01649	g20324.t1	TRUE	TRUE	TRUE	TRUE	FALSE	TRUE	TRUE	TRUE	FALSE	FALSE
Mnat_01657	g22452.t1;g4119.t1	TRUE	FALSE	FALSE	FALSE	FALSE	FALSE	TRUE	FALSE	FALSE	FALSE
Mnat_01662	g20308.t1	TRUE	TRUE	TRUE	TRUE	FALSE	FALSE	TRUE	FALSE	FALSE	FALSE
Mnat_01663	g20491.t1	TRUE	FALSE	FALSE	FALSE	FALSE	FALSE	TRUE	FALSE	FALSE	FALSE
Mnat_01670	g22452.t1;g4119.t1	TRUE	FALSE	FALSE	FALSE	FALSE	TRUE	TRUE	TRUE	FALSE	FALSE
Mnat_01671	g22452.t1;g4119.t1	TRUE	FALSE	FALSE	FALSE	FALSE	FALSE	TRUE	FALSE	FALSE	FALSE
Mnat_01675	g20304.t2;g20304.t1	TRUE	FALSE	FALSE	TRUE	FALSE	FALSE	TRUE	FALSE	FALSE	FALSE
Mnat_01683	g18017.t1	TRUE	FALSE	FALSE	FALSE	FALSE	FALSE	TRUE	FALSE	FALSE	FALSE
Mnat_01689	g2210.t1	TRUE	FALSE	FALSE	FALSE	FALSE	FALSE	TRUE	FALSE	FALSE	FALSE
Mnat_01694	g20294.t1	TRUE	TRUE	TRUE	TRUE	TRUE	FALSE	FALSE	FALSE	TRUE	TRUE
Mnat_01698	g20291.t1	TRUE	TRUE	TRUE	TRUE	FALSE	FALSE	TRUE	FALSE	FALSE	FALSE
Mnat_01706	g20287.t1	TRUE	TRUE	TRUE	TRUE	FALSE	TRUE	TRUE	TRUE	FALSE	FALSE
Mnat_01708	g17297.t1	TRUE	FALSE	TRUE	FALSE	FALSE	TRUE	TRUE	TRUE	FALSE	FALSE
Mnat_01710	g6500.t1	TRUE	FALSE	FALSE	FALSE	FALSE	FALSE	TRUE	FALSE	FALSE	FALSE
Mnat_01715	g20285.t1	TRUE	FALSE	FALSE	FALSE	FALSE	TRUE	FALSE	TRUE	FALSE	TRUE
Mnat_01719	g20283.t1	TRUE	TRUE	TRUE	TRUE	TRUE	TRUE	FALSE	FALSE	FALSE	TRUE
Mnat_01722	g20282.t1	TRUE	FALSE	TRUE	FALSE	FALSE	TRUE	FALSE	TRUE	FALSE	TRUE
Mnat_01724	g20281.t2	TRUE	TRUE	TRUE	TRUE	FALSE	TRUE	TRUE	TRUE	FALSE	FALSE
Mnat_01728	g20278.t1	TRUE	TRUE	TRUE	TRUE	TRUE	FALSE	FALSE	FALSE	FALSE	TRUE
Mnat_01735	g22626.t1;g22625.t1;g22627.t2;g22627.t1	TRUE	FALSE	FALSE	TRUE	TRUE	TRUE	FALSE	FALSE	TRUE	TRUE
Mnat_01736	g22624.t1;g22544.t1	TRUE	FALSE	FALSE	TRUE	FALSE	FALSE	TRUE	FALSE	FALSE	FALSE
Mnat_01737	g22623.t1;g22623.t4;g22623.t5;g22623.t3	TRUE	FALSE	FALSE	TRUE	FALSE	TRUE	TRUE	TRUE	FALSE	FALSE
Mnat_01741	g22620.t2;g22620.t1	TRUE	FALSE	FALSE	TRUE	TRUE	FALSE	FALSE	FALSE	TRUE	TRUE
Mnat_01743	g22618.t1	TRUE	TRUE	TRUE	TRUE	TRUE	FALSE	TRUE	FALSE	TRUE	TRUE
Mnat_01746	g22613.t1	TRUE	TRUE	TRUE	TRUE	TRUE	TRUE	FALSE	FALSE	TRUE	TRUE
Mnat_01748	g22610.t1	TRUE	TRUE	TRUE	TRUE	TRUE	TRUE	FALSE	FALSE	TRUE	TRUE
Mnat_01749	g22609.t1	TRUE	TRUE	TRUE	TRUE	FALSE	TRUE	TRUE	TRUE	FALSE	FALSE
Mnat_01750	g22608.t1;g22608.t2	TRUE	FALSE	FALSE	TRUE	FALSE	FALSE	TRUE	FALSE	FALSE	FALSE
Mnat_01754	g6228.t1;g6228.t2;g6229.t2;g6229.t1	TRUE	FALSE	FALSE	FALSE	FALSE	FALSE	TRUE	FALSE	FALSE	FALSE
Mnat_01756	g22603.t1;g22603.t2	TRUE	FALSE	FALSE	TRUE	FALSE	FALSE	TRUE	FALSE	FALSE	FALSE
Mnat_01759	g7317.t1;g6642.t1;g7155.t1;g7319.t1;g23041.t1;g12498.t1;g10858.t1	TRUE	FALSE	FALSE	TRUE	FALSE	FALSE	TRUE	FALSE	FALSE	FALSE
Mnat_01761	g13649.t1	TRUE	FALSE	FALSE	FALSE	FALSE	FALSE	TRUE	FALSE	FALSE	FALSE
Mnat_01762	g8536.t1	TRUE	FALSE	FALSE	FALSE	FALSE	TRUE	TRUE	TRUE	FALSE	FALSE
Mnat_01772	g22587.t1	TRUE	TRUE	TRUE	TRUE	FALSE	TRUE	TRUE	TRUE	FALSE	FALSE
Mnat_01773	g22585.t1	TRUE	TRUE	TRUE	TRUE	TRUE	FALSE	FALSE	FALSE	TRUE	TRUE
Mnat_01775	g18784.t1	TRUE	FALSE	FALSE	FALSE	FALSE	FALSE	TRUE	FALSE	FALSE	FALSE
Mnat_01777	g22452.t1;g4119.t1	TRUE	FALSE	FALSE	FALSE	FALSE	TRUE	TRUE	TRUE	FALSE	FALSE
Mnat_01779	g1313.t1;g2859.t1	TRUE	FALSE	FALSE	FALSE	FALSE	TRUE	FALSE	FALSE	FALSE	TRUE
Mnat_01782	g4560.t1	TRUE	TRUE	TRUE	TRUE	TRUE	FALSE	FALSE	FALSE	TRUE	TRUE
Mnat_01783	g7156.t1	TRUE	FALSE	FALSE	FALSE	FALSE	FALSE	TRUE	FALSE	FALSE	FALSE
Mnat_01786	g4562.t1;g4562.t2	TRUE	FALSE	FALSE	TRUE	FALSE	FALSE	TRUE	FALSE	FALSE	FALSE
Mnat_01790	g4575.t1;g4575.t2	TRUE	FALSE	FALSE	TRUE	FALSE	TRUE	FALSE	TRUE	FALSE	FALSE
Mnat_01791	g4576.t1;g17221.t1	TRUE	FALSE	FALSE	TRUE	FALSE	FALSE	TRUE	FALSE	FALSE	FALSE
Mnat_01792	g4578.t1	TRUE	TRUE	TRUE	TRUE	TRUE	TRUE	FALSE	FALSE	TRUE	TRUE
Mnat_01794	g20491.t1	TRUE	FALSE	FALSE	FALSE	FALSE	FALSE	TRUE	FALSE	FALSE	FALSE
Mnat_01795	g4581.t1	TRUE	TRUE	TRUE	TRUE	TRUE	FALSE	FALSE	FALSE	TRUE	FALSE
Mnat_01799	g4584.t1	TRUE	TRUE	TRUE	TRUE	TRUE	FALSE	TRUE	FALSE	TRUE	TRUE
Mnat_01803	g4601.t1	TRUE	TRUE	TRUE	TRUE	FALSE	FALSE	TRUE	FALSE	FALSE	FALSE
Mnat_01804	g4603.t1	TRUE	TRUE	TRUE	TRUE	TRUE	FALSE	FALSE	FALSE	TRUE	TRUE
Mnat_01805	g4604.t1	TRUE	TRUE	TRUE	TRUE	FALSE	TRUE	TRUE	TRUE	FALSE	FALSE
Mnat_01806	g4613.t1;g4613.t3;g4613.t2;g4613.t4	TRUE	FALSE	FALSE	TRUE	FALSE	FALSE	TRUE	FALSE	FALSE	FALSE
Mnat_01809	g4628.t3;g4628.t1;g4628.t2;g1312.t1	TRUE	FALSE	FALSE	TRUE	FALSE	FALSE	TRUE	FALSE	FALSE	FALSE
Mnat_01810	g4629.t1	TRUE	TRUE	TRUE	TRUE	FALSE	FALSE	TRUE	FALSE	FALSE	FALSE
Mnat_01811	g9226.t1	TRUE	TRUE	TRUE	TRUE	TRUE	FALSE	TRUE	FALSE	TRUE	FALSE
Mnat_01812	g9224.t1	TRUE	TRUE	TRUE	TRUE	FALSE	FALSE	TRUE	FALSE	FALSE	FALSE
Mnat_01813	g9223.t1	TRUE	TRUE	TRUE	TRUE	FALSE	FALSE	TRUE	FALSE	FALSE	FALSE
Mnat_01815	g9222.t1	TRUE	TRUE	TRUE	TRUE	FALSE	FALSE	TRUE	FALSE	FALSE	FALSE
Mnat_01816	g9220.t1	TRUE	TRUE	TRUE	TRUE	TRUE	FALSE	FALSE	FALSE	TRUE	TRUE
Mnat_01817	g9219.t1	TRUE	TRUE	TRUE	TRUE	TRUE	FALSE	FALSE	FALSE	TRUE	TRUE
Mnat_01819	g9218.t3;g9218.t2;g9218.t1	TRUE	FALSE	FALSE	TRUE	TRUE	TRUE	FALSE	FALSE	FALSE	TRUE
Mnat_01822	g9216.t1	TRUE	TRUE	TRUE	TRUE	TRUE	TRUE	FALSE	FALSE	TRUE	TRUE
Mnat_01823	g9215.t2;g9215.t1	TRUE	FALSE	FALSE	TRUE	TRUE	FALSE	FALSE	FALSE	TRUE	TRUE
Mnat_01826	g6582.t1	TRUE	FALSE	FALSE	FALSE	FALSE	FALSE	TRUE	FALSE	FALSE	FALSE
Mnat_01828	g9213.t1	TRUE	TRUE	TRUE	TRUE	TRUE	FALSE	FALSE	FALSE	TRUE	TRUE
Mnat_01831	g9212.t1	TRUE	TRUE	TRUE	TRUE	TRUE	TRUE	FALSE	FALSE	FALSE	TRUE
Mnat_01832	g9209.t1	TRUE	TRUE	TRUE	TRUE	TRUE	FALSE	FALSE	FALSE	TRUE	TRUE
Mnat_01834	g9207.t1	TRUE	TRUE	TRUE	TRUE	TRUE	FALSE	FALSE	FALSE	TRUE	TRUE
Mnat_01836	g9205.t1	TRUE	FALSE	FALSE	FALSE	TRUE	FALSE	FALSE	FALSE	TRUE	TRUE
Mnat_01837	g9204.t1	TRUE	TRUE	TRUE	TRUE	FALSE	FALSE	TRUE	FALSE	FALSE	FALSE
Mnat_01838	g9203.t1	TRUE	TRUE	TRUE	TRUE	TRUE	FALSE	FALSE	FALSE	TRUE	FALSE
Mnat_01850	g22452.t1;g4119.t1	TRUE	FALSE	FALSE	FALSE	FALSE	FALSE	TRUE	FALSE	FALSE	FALSE
Mnat_01858	g19391.t3	TRUE	FALSE	TRUE	FALSE	FALSE	FALSE	TRUE	FALSE	FALSE	FALSE
Mnat_01869	g7078.t1	TRUE	FALSE	FALSE	FALSE	FALSE	FALSE	TRUE	FALSE	FALSE	FALSE
Mnat_01874	g9178.t1	TRUE	TRUE	TRUE	TRUE	FALSE	FALSE	TRUE	FALSE	FALSE	FALSE
Mnat_01875	g2210.t1	TRUE	FALSE	FALSE	FALSE	FALSE	FALSE	TRUE	FALSE	FALSE	FALSE
Mnat_01877	g9177.t1	TRUE	TRUE	TRUE	TRUE	FALSE	FALSE	TRUE	FALSE	FALSE	FALSE
Mnat_01879	g9175.t1	TRUE	TRUE	TRUE	TRUE	FALSE	TRUE	TRUE	TRUE	FALSE	FALSE
Mnat_01881	g9173.t1	TRUE	TRUE	TRUE	TRUE	TRUE	FALSE	FALSE	FALSE	TRUE	TRUE
Mnat_01884	g11988.t1	TRUE	FALSE	FALSE	FALSE	FALSE	FALSE	TRUE	FALSE	FALSE	FALSE
Mnat_01885	g9171.t2;g9171.t1	TRUE	FALSE	FALSE	TRUE	FALSE	FALSE	TRUE	FALSE	FALSE	FALSE
Mnat_01889	g20491.t1	TRUE	FALSE	FALSE	FALSE	FALSE	FALSE	TRUE	FALSE	FALSE	FALSE
Mnat_01890	g19450.t1	TRUE	FALSE	FALSE	FALSE	FALSE	TRUE	TRUE	TRUE	FALSE	FALSE
Mnat_01891	g22452.t1;g4119.t1	TRUE	FALSE	FALSE	FALSE	FALSE	FALSE	TRUE	FALSE	FALSE	FALSE
Mnat_01899	g13170.t1	TRUE	FALSE	FALSE	FALSE	FALSE	FALSE	TRUE	FALSE	FALSE	FALSE
Mnat_01901	g730.t1;g9159.t2;g9159.t1	TRUE	FALSE	FALSE	TRUE	FALSE	TRUE	FALSE	TRUE	FALSE	FALSE
Mnat_01904	g9154.t1;g9154.t2	TRUE	FALSE	FALSE	TRUE	FALSE	FALSE	FALSE	FALSE	FALSE	FALSE
Mnat_01906	g9149.t1	TRUE	TRUE	TRUE	TRUE	FALSE	FALSE	TRUE	FALSE	FALSE	FALSE
Mnat_01908	g17519.t1	TRUE	FALSE	FALSE	FALSE	FALSE	FALSE	TRUE	FALSE	FALSE	FALSE
Mnat_01910	g22861.t1	TRUE	FALSE	FALSE	FALSE	FALSE	FALSE	TRUE	FALSE	FALSE	FALSE
Mnat_01917	g8423.t2;g8423.t1	TRUE	FALSE	FALSE	TRUE	FALSE	FALSE	TRUE	FALSE	FALSE	FALSE
Mnat_01920	g8424.t1	TRUE	TRUE	TRUE	TRUE	FALSE	FALSE	TRUE	FALSE	FALSE	FALSE
Mnat_01923	g14824.t1	TRUE	FALSE	FALSE	FALSE	FALSE	TRUE	TRUE	TRUE	FALSE	FALSE
Mnat_01927	g16517.t1	TRUE	FALSE	FALSE	FALSE	FALSE	TRUE	TRUE	TRUE	FALSE	FALSE
Mnat_01929	g8430.t1	TRUE	TRUE	TRUE	TRUE	FALSE	FALSE	TRUE	FALSE	FALSE	FALSE
Mnat_01934	g8433.t2;g8433.t1	TRUE	FALSE	FALSE	TRUE	FALSE	TRUE	TRUE	TRUE	FALSE	FALSE
Mnat_01935	g8434.t1	TRUE	TRUE	TRUE	TRUE	FALSE	FALSE	TRUE	FALSE	FALSE	FALSE
Mnat_01936	g8435.t1	TRUE	TRUE	TRUE	TRUE	FALSE	TRUE	TRUE	TRUE	FALSE	FALSE
Mnat_01941	g8436.t1	TRUE	TRUE	TRUE	TRUE	FALSE	TRUE	TRUE	TRUE	FALSE	FALSE
Mnat_01942	g7078.t1	TRUE	FALSE	FALSE	FALSE	FALSE	FALSE	TRUE	FALSE	FALSE	FALSE
Mnat_01953	g8439.t1	TRUE	TRUE	TRUE	TRUE	TRUE	FALSE	FALSE	FALSE	TRUE	TRUE
Mnat_01954	g9571.t1;g9571.t2	TRUE	FALSE	FALSE	TRUE	FALSE	FALSE	TRUE	FALSE	FALSE	FALSE
Mnat_01955	g8440.t3;g8440.t1;g8440.t2	TRUE	FALSE	FALSE	TRUE	FALSE	FALSE	TRUE	FALSE	FALSE	FALSE
Mnat_01958	g11105.t1	TRUE	TRUE	TRUE	TRUE	TRUE	TRUE	FALSE	FALSE	TRUE	TRUE
Mnat_01967	g11095.t1	TRUE	TRUE	TRUE	TRUE	FALSE	FALSE	TRUE	FALSE	FALSE	FALSE
Mnat_01972	g20197.t1	TRUE	TRUE	TRUE	TRUE	FALSE	FALSE	TRUE	FALSE	FALSE	FALSE
Mnat_01974	g20198.t2;g20198.t1	TRUE	FALSE	FALSE	TRUE	FALSE	TRUE	TRUE	TRUE	FALSE	TRUE
Mnat_01976	g2169.t1;g2169.t5;g2169.t4;g2169.t3;g2169.t2;g2169.t6	TRUE	FALSE	FALSE	TRUE	FALSE	TRUE	FALSE	TRUE	FALSE	TRUE
Mnat_01977	g2164.t1;g2164.t2	TRUE	FALSE	FALSE	TRUE	FALSE	TRUE	TRUE	TRUE	FALSE	FALSE
Mnat_01983	g9552.t1;g9552.t2	TRUE	FALSE	FALSE	FALSE	FALSE	TRUE	TRUE	TRUE	FALSE	FALSE
Mnat_01984	g2157.t1;g2157.t2	TRUE	FALSE	FALSE	TRUE	FALSE	TRUE	TRUE	TRUE	FALSE	FALSE
Mnat_01988	g16936.t1	TRUE	FALSE	FALSE	FALSE	FALSE	FALSE	FALSE	FALSE	FALSE	FALSE
Mnat_01991	g2152.t1	TRUE	TRUE	TRUE	TRUE	FALSE	FALSE	TRUE	FALSE	FALSE	FALSE
Mnat_01992	g2151.t1	TRUE	TRUE	TRUE	TRUE	TRUE	FALSE	FALSE	FALSE	FALSE	TRUE
Mnat_01995	g2149.t1	TRUE	TRUE	TRUE	TRUE	FALSE	FALSE	TRUE	FALSE	FALSE	FALSE
Mnat_01996	g2148.t1	TRUE	TRUE	TRUE	TRUE	FALSE	FALSE	TRUE	FALSE	FALSE	FALSE
Mnat_02000	g2145.t3	TRUE	TRUE	TRUE	TRUE	FALSE	TRUE	FALSE	TRUE	FALSE	TRUE
Mnat_02001	g2143.t1	TRUE	TRUE	TRUE	TRUE	TRUE	TRUE	FALSE	FALSE	FALSE	TRUE
Mnat_02002	g2142.t1;g2142.t2	TRUE	FALSE	FALSE	TRUE	FALSE	FALSE	TRUE	FALSE	FALSE	FALSE
Mnat_02004	g2140.t1	TRUE	TRUE	TRUE	TRUE	TRUE	FALSE	TRUE	FALSE	TRUE	TRUE
Mnat_02006	g2138.t1	TRUE	TRUE	TRUE	TRUE	FALSE	FALSE	TRUE	FALSE	FALSE	FALSE
Mnat_02007	g7812.t1;g7812.t4;g7812.t2;g7812.t3	TRUE	FALSE	FALSE	TRUE	FALSE	TRUE	TRUE	TRUE	FALSE	FALSE
Mnat_02012	g7810.t1	TRUE	TRUE	TRUE	TRUE	TRUE	TRUE	FALSE	FALSE	TRUE	TRUE
Mnat_02014	g7807.t1;g7807.t2	TRUE	FALSE	FALSE	TRUE	TRUE	TRUE	FALSE	FALSE	TRUE	TRUE
Mnat_02016	g7806.t1	TRUE	TRUE	TRUE	TRUE	TRUE	FALSE	FALSE	FALSE	TRUE	TRUE
Mnat_02021	g7804.t1	TRUE	TRUE	TRUE	TRUE	TRUE	FALSE	TRUE	FALSE	TRUE	TRUE
Mnat_02026	g7800.t2;g7800.t1;g7800.t4;g7800.t3	TRUE	FALSE	FALSE	TRUE	TRUE	FALSE	FALSE	FALSE	FALSE	TRUE
Mnat_02027	g22452.t1;g4119.t1	TRUE	FALSE	FALSE	FALSE	FALSE	TRUE	TRUE	TRUE	FALSE	FALSE
Mnat_02041	g7788.t1	TRUE	TRUE	TRUE	TRUE	FALSE	FALSE	TRUE	FALSE	FALSE	FALSE
Mnat_02042	g7786.t3;g7786.t2;g7786.t1	TRUE	FALSE	FALSE	TRUE	FALSE	FALSE	TRUE	FALSE	FALSE	FALSE
Mnat_02044	g7785.t1	TRUE	TRUE	TRUE	TRUE	TRUE	FALSE	FALSE	FALSE	TRUE	TRUE
Mnat_02050	g23211.t1	TRUE	FALSE	TRUE	FALSE	FALSE	TRUE	TRUE	TRUE	FALSE	FALSE
Mnat_02052	g3493.t1	TRUE	TRUE	TRUE	TRUE	FALSE	FALSE	TRUE	FALSE	FALSE	FALSE
Mnat_02053	g3494.t2;g3494.t1	TRUE	FALSE	FALSE	TRUE	TRUE	FALSE	TRUE	FALSE	TRUE	TRUE
Mnat_02056	g3497.t2	TRUE	TRUE	TRUE	TRUE	TRUE	FALSE	FALSE	FALSE	FALSE	TRUE
Mnat_02057	g3499.t1	TRUE	TRUE	TRUE	TRUE	TRUE	FALSE	FALSE	FALSE	FALSE	TRUE
Mnat_02058	g3500.t5;g3500.t1;g3500.t2;g3500.t6;g3500.t4;g3500.t3	TRUE	FALSE	FALSE	TRUE	FALSE	TRUE	TRUE	TRUE	FALSE	FALSE
Mnat_02060	g5098.t1	TRUE	FALSE	FALSE	FALSE	FALSE	FALSE	TRUE	FALSE	FALSE	FALSE
Mnat_02061	g1516.t2	TRUE	TRUE	TRUE	TRUE	FALSE	FALSE	TRUE	FALSE	FALSE	FALSE
Mnat_02063	g1517.t1	TRUE	TRUE	TRUE	TRUE	TRUE	FALSE	FALSE	FALSE	TRUE	TRUE
Mnat_02064	g1518.t1	TRUE	TRUE	TRUE	TRUE	FALSE	TRUE	TRUE	TRUE	FALSE	FALSE
Mnat_02065	g1527.t2;g1527.t3;g1527.t1	TRUE	FALSE	FALSE	TRUE	TRUE	TRUE	FALSE	FALSE	TRUE	TRUE
Mnat_02067	g1530.t2;g1530.t1	TRUE	FALSE	FALSE	TRUE	FALSE	FALSE	TRUE	FALSE	FALSE	FALSE
Mnat_02070	g1532.t1	TRUE	TRUE	TRUE	TRUE	TRUE	FALSE	FALSE	FALSE	TRUE	TRUE
Mnat_02071	g1535.t1	TRUE	TRUE	TRUE	TRUE	FALSE	FALSE	TRUE	FALSE	FALSE	FALSE
Mnat_02075	g1543.t1	TRUE	TRUE	TRUE	TRUE	TRUE	TRUE	FALSE	FALSE	TRUE	TRUE
Mnat_02076	g1545.t1	TRUE	TRUE	TRUE	TRUE	TRUE	TRUE	FALSE	FALSE	FALSE	TRUE
Mnat_02078	g1546.t2;g1546.t1	TRUE	FALSE	FALSE	TRUE	FALSE	FALSE	TRUE	FALSE	FALSE	FALSE
Mnat_02080	g1547.t1	TRUE	TRUE	TRUE	TRUE	TRUE	FALSE	FALSE	FALSE	TRUE	TRUE
Mnat_02081	g1548.t2;g1548.t1	TRUE	FALSE	FALSE	TRUE	TRUE	TRUE	FALSE	FALSE	TRUE	TRUE
Mnat_02085	g1553.t1	TRUE	TRUE	TRUE	TRUE	TRUE	FALSE	FALSE	FALSE	TRUE	TRUE
Mnat_02086	g1554.t1	TRUE	TRUE	TRUE	TRUE	TRUE	FALSE	FALSE	FALSE	TRUE	TRUE
Mnat_02087	g7427.t1	TRUE	FALSE	FALSE	FALSE	TRUE	FALSE	FALSE	FALSE	TRUE	TRUE
Mnat_02088	g1556.t3;g1556.t1;g1556.t2	TRUE	FALSE	FALSE	TRUE	FALSE	TRUE	TRUE	TRUE	FALSE	FALSE
Mnat_02089	g1557.t1	TRUE	TRUE	TRUE	TRUE	FALSE	TRUE	TRUE	TRUE	FALSE	FALSE
Mnat_02091	g1559.t1	TRUE	TRUE	TRUE	TRUE	TRUE	FALSE	TRUE	FALSE	TRUE	FALSE
Mnat_02092	g1562.t1	TRUE	TRUE	TRUE	TRUE	FALSE	FALSE	TRUE	FALSE	FALSE	FALSE
Mnat_02094	g2210.t1	TRUE	FALSE	FALSE	FALSE	FALSE	FALSE	TRUE	FALSE	FALSE	FALSE
Mnat_02098	g2942.t1	TRUE	TRUE	TRUE	TRUE	TRUE	TRUE	FALSE	FALSE	TRUE	TRUE
Mnat_02100	g2944.t1	TRUE	FALSE	TRUE	FALSE	TRUE	TRUE	FALSE	FALSE	TRUE	TRUE
Mnat_02101	g2945.t1;g2945.t2	TRUE	FALSE	FALSE	TRUE	TRUE	TRUE	FALSE	FALSE	TRUE	TRUE
Mnat_02102	g2946.t1	TRUE	TRUE	TRUE	TRUE	FALSE	FALSE	TRUE	FALSE	FALSE	FALSE
Mnat_02103	g19450.t1	TRUE	FALSE	FALSE	FALSE	FALSE	FALSE	TRUE	FALSE	FALSE	FALSE
Mnat_02108	g2956.t1;g2956.t2;g2956.t3	TRUE	FALSE	FALSE	TRUE	FALSE	FALSE	TRUE	FALSE	FALSE	FALSE
Mnat_02110	g2957.t1	TRUE	TRUE	TRUE	TRUE	FALSE	FALSE	TRUE	FALSE	FALSE	FALSE
Mnat_02118	g2960.t1	TRUE	TRUE	TRUE	TRUE	TRUE	TRUE	FALSE	FALSE	TRUE	TRUE
Mnat_02120	g2963.t3;g2963.t2;g2963.t4;g2963.t1	TRUE	FALSE	FALSE	TRUE	TRUE	FALSE	FALSE	FALSE	TRUE	TRUE
Mnat_02121	g2964.t1;g2964.t2	TRUE	FALSE	FALSE	TRUE	TRUE	FALSE	FALSE	FALSE	TRUE	TRUE
Mnat_02123	g2965.t1	TRUE	TRUE	TRUE	TRUE	TRUE	TRUE	FALSE	FALSE	TRUE	TRUE
Mnat_02125	g2968.t1	TRUE	TRUE	TRUE	TRUE	FALSE	FALSE	TRUE	FALSE	FALSE	FALSE
Mnat_02130	g16517.t1	TRUE	FALSE	FALSE	FALSE	FALSE	FALSE	TRUE	FALSE	FALSE	FALSE
Mnat_02131	g2979.t1	TRUE	TRUE	TRUE	TRUE	FALSE	TRUE	FALSE	FALSE	FALSE	TRUE
Mnat_02132	g2982.t1	TRUE	TRUE	TRUE	TRUE	FALSE	TRUE	TRUE	TRUE	FALSE	FALSE
Mnat_02135	g2986.t2	TRUE	TRUE	TRUE	TRUE	FALSE	TRUE	TRUE	TRUE	FALSE	FALSE
Mnat_02138	g2989.t1	TRUE	TRUE	TRUE	TRUE	TRUE	FALSE	FALSE	FALSE	FALSE	TRUE
Mnat_02140	g19040.t1	TRUE	FALSE	FALSE	FALSE	FALSE	TRUE	FALSE	FALSE	FALSE	TRUE
Mnat_02142	g21300.t1	TRUE	FALSE	FALSE	FALSE	TRUE	TRUE	FALSE	FALSE	TRUE	TRUE
Mnat_02150	g3015.t1	TRUE	TRUE	TRUE	TRUE	FALSE	FALSE	TRUE	FALSE	FALSE	FALSE
Mnat_02151	g2210.t1	TRUE	FALSE	FALSE	FALSE	FALSE	TRUE	TRUE	TRUE	FALSE	FALSE
Mnat_02152	g16517.t1	TRUE	FALSE	FALSE	FALSE	FALSE	FALSE	TRUE	FALSE	FALSE	FALSE
Mnat_02160	g6417.t1;g6417.t2	TRUE	FALSE	FALSE	TRUE	FALSE	FALSE	TRUE	FALSE	FALSE	FALSE
Mnat_02161	g6418.t1	TRUE	TRUE	TRUE	TRUE	FALSE	TRUE	TRUE	TRUE	FALSE	FALSE
Mnat_02162	g6420.t1	TRUE	TRUE	TRUE	TRUE	FALSE	TRUE	TRUE	TRUE	FALSE	FALSE
Mnat_02163	g6422.t2	TRUE	TRUE	TRUE	TRUE	FALSE	FALSE	TRUE	FALSE	FALSE	FALSE
Mnat_02164	g6423.t1;g6423.t2	TRUE	FALSE	FALSE	TRUE	TRUE	FALSE	FALSE	FALSE	FALSE	TRUE
Mnat_02165	g6424.t1	TRUE	TRUE	TRUE	TRUE	FALSE	FALSE	TRUE	FALSE	FALSE	FALSE
Mnat_02170	g6428.t1	TRUE	TRUE	TRUE	TRUE	TRUE	FALSE	FALSE	FALSE	TRUE	TRUE
Mnat_02171	g6429.t1	TRUE	TRUE	TRUE	TRUE	TRUE	FALSE	FALSE	FALSE	FALSE	TRUE
Mnat_02174	g7245.t1	TRUE	TRUE	TRUE	TRUE	FALSE	FALSE	TRUE	FALSE	FALSE	FALSE
Mnat_02177	g9659.t2	TRUE	TRUE	TRUE	TRUE	FALSE	FALSE	TRUE	FALSE	FALSE	FALSE
Mnat_02181	g7248.t1	TRUE	TRUE	TRUE	TRUE	FALSE	TRUE	TRUE	TRUE	FALSE	FALSE
Mnat_02182	g7253.t1;g7253.t2	TRUE	FALSE	FALSE	TRUE	FALSE	FALSE	TRUE	FALSE	FALSE	FALSE
Mnat_02183	g7254.t1	TRUE	TRUE	TRUE	TRUE	FALSE	FALSE	TRUE	FALSE	FALSE	FALSE
Mnat_02184	g7255.t1;g14951.t1	TRUE	FALSE	FALSE	TRUE	TRUE	FALSE	FALSE	FALSE	TRUE	TRUE
Mnat_02185	g227.t1	TRUE	TRUE	TRUE	TRUE	FALSE	TRUE	TRUE	TRUE	FALSE	FALSE
Mnat_02188	g229.t1	TRUE	TRUE	TRUE	TRUE	TRUE	FALSE	FALSE	FALSE	FALSE	TRUE
Mnat_02190	g232.t2	TRUE	TRUE	TRUE	TRUE	TRUE	FALSE	FALSE	FALSE	TRUE	TRUE
Mnat_02194	g233.t1	TRUE	TRUE	TRUE	TRUE	FALSE	FALSE	TRUE	FALSE	FALSE	FALSE
Mnat_02198	g237.t1	TRUE	TRUE	TRUE	TRUE	TRUE	FALSE	FALSE	FALSE	TRUE	TRUE
Mnat_02201	g240.t1	TRUE	TRUE	TRUE	TRUE	TRUE	FALSE	FALSE	FALSE	TRUE	TRUE
Mnat_02205	g244.t1	TRUE	TRUE	TRUE	TRUE	TRUE	TRUE	FALSE	FALSE	TRUE	TRUE
Mnat_02206	g245.t1	TRUE	TRUE	TRUE	TRUE	TRUE	TRUE	FALSE	FALSE	TRUE	TRUE
Mnat_02207	g247.t1	TRUE	TRUE	TRUE	TRUE	TRUE	FALSE	FALSE	FALSE	FALSE	TRUE
Mnat_02208	g248.t2;g248.t1	TRUE	FALSE	FALSE	TRUE	TRUE	TRUE	FALSE	FALSE	TRUE	TRUE
Mnat_02209	g249.t1	TRUE	TRUE	TRUE	TRUE	TRUE	FALSE	FALSE	FALSE	TRUE	TRUE
Mnat_02210	g250.t1	TRUE	TRUE	TRUE	TRUE	TRUE	TRUE	FALSE	FALSE	TRUE	TRUE
Mnat_02211	g252.t1	TRUE	TRUE	TRUE	TRUE	FALSE	FALSE	TRUE	FALSE	FALSE	FALSE
Mnat_02213	g253.t1	TRUE	FALSE	FALSE	FALSE	FALSE	FALSE	TRUE	FALSE	FALSE	FALSE
Mnat_02214	g254.t1	TRUE	TRUE	TRUE	TRUE	FALSE	FALSE	TRUE	FALSE	FALSE	FALSE
Mnat_02215	g256.t3;g256.t1;g256.t2	TRUE	FALSE	FALSE	TRUE	TRUE	TRUE	FALSE	FALSE	TRUE	TRUE
Mnat_02217	g257.t1	TRUE	TRUE	TRUE	TRUE	TRUE	TRUE	FALSE	FALSE	TRUE	TRUE
Mnat_02218	g258.t1	TRUE	TRUE	TRUE	TRUE	FALSE	FALSE	TRUE	FALSE	FALSE	FALSE
Mnat_02219	g259.t1	TRUE	TRUE	TRUE	TRUE	FALSE	FALSE	TRUE	FALSE	FALSE	FALSE
Mnat_02220	g260.t1	TRUE	TRUE	TRUE	TRUE	FALSE	FALSE	FALSE	FALSE	FALSE	FALSE
Mnat_02225	g4854.t2;g4854.t1	TRUE	FALSE	FALSE	TRUE	FALSE	FALSE	TRUE	FALSE	FALSE	FALSE
Mnat_02227	g4855.t1	TRUE	TRUE	TRUE	TRUE	TRUE	FALSE	FALSE	FALSE	TRUE	TRUE
Mnat_02228	g4856.t1	TRUE	FALSE	FALSE	FALSE	FALSE	FALSE	TRUE	FALSE	FALSE	FALSE
Mnat_02232	g4858.t1	TRUE	TRUE	TRUE	TRUE	TRUE	FALSE	FALSE	FALSE	TRUE	TRUE
Mnat_02233	g4861.t1	TRUE	TRUE	TRUE	TRUE	TRUE	TRUE	FALSE	FALSE	TRUE	TRUE
Mnat_02239	g4865.t4;g4865.t1;g4865.t3;g4865.t2	TRUE	FALSE	FALSE	TRUE	FALSE	FALSE	TRUE	FALSE	FALSE	FALSE
Mnat_02240	g4866.t1	TRUE	TRUE	TRUE	TRUE	FALSE	FALSE	TRUE	FALSE	FALSE	FALSE
Mnat_02242	g4868.t2;g4868.t1	TRUE	FALSE	FALSE	TRUE	TRUE	FALSE	FALSE	FALSE	TRUE	TRUE
Mnat_02243	g4869.t1	TRUE	TRUE	TRUE	TRUE	TRUE	FALSE	FALSE	FALSE	TRUE	TRUE
Mnat_02244	g4870.t2;g4870.t1	TRUE	FALSE	FALSE	TRUE	TRUE	FALSE	FALSE	FALSE	TRUE	TRUE
Mnat_02246	g4874.t1	TRUE	TRUE	TRUE	TRUE	TRUE	FALSE	TRUE	FALSE	TRUE	TRUE
Mnat_02248	g4875.t1	TRUE	TRUE	TRUE	TRUE	TRUE	FALSE	FALSE	FALSE	TRUE	TRUE
Mnat_02250	g4878.t2;g4878.t1	TRUE	FALSE	FALSE	TRUE	TRUE	FALSE	FALSE	FALSE	TRUE	TRUE
Mnat_02255	g4883.t1	TRUE	TRUE	TRUE	TRUE	FALSE	TRUE	FALSE	FALSE	FALSE	TRUE
Mnat_02257	g4884.t2	TRUE	TRUE	TRUE	TRUE	TRUE	FALSE	FALSE	FALSE	TRUE	TRUE
Mnat_02259	g4889.t1	TRUE	TRUE	TRUE	TRUE	TRUE	FALSE	FALSE	FALSE	TRUE	TRUE
Mnat_02262	g4890.t1	TRUE	TRUE	TRUE	TRUE	TRUE	FALSE	FALSE	FALSE	FALSE	TRUE
Mnat_02265	g2268.t1;g2268.t2	TRUE	FALSE	FALSE	TRUE	FALSE	FALSE	TRUE	FALSE	FALSE	FALSE
Mnat_02267	g13649.t1	TRUE	FALSE	FALSE	FALSE	FALSE	FALSE	TRUE	FALSE	FALSE	FALSE
Mnat_02273	g2252.t1	TRUE	TRUE	TRUE	TRUE	TRUE	FALSE	TRUE	FALSE	FALSE	TRUE
Mnat_02274	g2251.t1	TRUE	TRUE	TRUE	TRUE	TRUE	FALSE	FALSE	FALSE	TRUE	TRUE
Mnat_02275	g2250.t1	TRUE	TRUE	TRUE	TRUE	TRUE	FALSE	FALSE	FALSE	TRUE	TRUE
Mnat_02277	g22452.t1;g4119.t1	TRUE	FALSE	FALSE	FALSE	FALSE	FALSE	TRUE	FALSE	FALSE	FALSE
Mnat_02282	g14418.t2;g14418.t1	TRUE	FALSE	FALSE	TRUE	FALSE	FALSE	TRUE	FALSE	FALSE	FALSE
Mnat_02283	g14419.t1	TRUE	TRUE	TRUE	TRUE	TRUE	FALSE	FALSE	FALSE	TRUE	TRUE
Mnat_02284	g14420.t1	TRUE	TRUE	TRUE	TRUE	TRUE	FALSE	FALSE	FALSE	TRUE	TRUE
Mnat_02285	g14421.t3	TRUE	TRUE	TRUE	TRUE	FALSE	FALSE	TRUE	FALSE	FALSE	FALSE
Mnat_02286	g14422.t1	TRUE	TRUE	TRUE	TRUE	TRUE	TRUE	FALSE	FALSE	TRUE	TRUE
Mnat_02288	g14424.t1	TRUE	TRUE	TRUE	TRUE	TRUE	FALSE	FALSE	FALSE	TRUE	TRUE
Mnat_02289	g14425.t1	TRUE	TRUE	TRUE	TRUE	TRUE	FALSE	FALSE	FALSE	FALSE	TRUE
Mnat_02304	g3989.t3	TRUE	TRUE	TRUE	TRUE	TRUE	FALSE	FALSE	FALSE	TRUE	TRUE
Mnat_02305	g3989.t1	TRUE	TRUE	TRUE	TRUE	TRUE	TRUE	FALSE	FALSE	TRUE	TRUE
Mnat_02307	g3988.t2;g3988.t1;g3988.t3	TRUE	FALSE	FALSE	TRUE	FALSE	TRUE	TRUE	TRUE	FALSE	FALSE
Mnat_02314	g3966.t1	TRUE	TRUE	TRUE	TRUE	TRUE	TRUE	FALSE	FALSE	TRUE	TRUE
Mnat_02316	g3963.t1	TRUE	TRUE	TRUE	TRUE	FALSE	TRUE	FALSE	TRUE	FALSE	TRUE
Mnat_02318	g3961.t1	TRUE	TRUE	TRUE	TRUE	FALSE	FALSE	TRUE	FALSE	FALSE	FALSE
Mnat_02325	g3955.t1	TRUE	TRUE	TRUE	TRUE	TRUE	FALSE	TRUE	FALSE	TRUE	FALSE
Mnat_02327	g12126.t1	TRUE	FALSE	FALSE	FALSE	FALSE	TRUE	TRUE	TRUE	FALSE	FALSE
Mnat_02332	g3942.t1	TRUE	TRUE	TRUE	TRUE	FALSE	FALSE	FALSE	FALSE	FALSE	FALSE
Mnat_02333	g3941.t4;g3941.t1;g3941.t3;g3941.t2	TRUE	FALSE	FALSE	TRUE	FALSE	FALSE	TRUE	FALSE	FALSE	FALSE
Mnat_02335	g3937.t1;g2640.t1	TRUE	FALSE	FALSE	TRUE	FALSE	TRUE	TRUE	TRUE	FALSE	FALSE
Mnat_02340	g10422.t3;g10422.t1;g10422.t2	TRUE	FALSE	FALSE	TRUE	TRUE	TRUE	FALSE	FALSE	TRUE	TRUE
Mnat_02341	g10421.t3;g10421.t2;g10421.t1;g10421.t5;g10421.t4	TRUE	FALSE	FALSE	TRUE	TRUE	TRUE	FALSE	FALSE	TRUE	TRUE
Mnat_02343	g10418.t1	TRUE	TRUE	TRUE	TRUE	FALSE	FALSE	TRUE	FALSE	FALSE	FALSE
Mnat_02345	g10416.t1;g10416.t2	TRUE	FALSE	FALSE	TRUE	FALSE	TRUE	TRUE	TRUE	FALSE	FALSE
Mnat_02347	g10414.t1	TRUE	TRUE	TRUE	TRUE	TRUE	TRUE	FALSE	FALSE	TRUE	TRUE
Mnat_02348	g10413.t1	TRUE	TRUE	TRUE	TRUE	TRUE	FALSE	FALSE	FALSE	TRUE	TRUE
Mnat_02349	g10412.t1	TRUE	TRUE	TRUE	TRUE	TRUE	FALSE	FALSE	FALSE	FALSE	TRUE
Mnat_02350	g2210.t1	TRUE	FALSE	FALSE	FALSE	FALSE	FALSE	TRUE	FALSE	FALSE	FALSE
Mnat_02351	g2210.t1	TRUE	FALSE	FALSE	FALSE	FALSE	FALSE	TRUE	FALSE	FALSE	FALSE
Mnat_02353	g10400.t1	TRUE	TRUE	TRUE	TRUE	FALSE	FALSE	TRUE	FALSE	FALSE	FALSE
Mnat_02358	g2210.t1	TRUE	FALSE	FALSE	FALSE	FALSE	FALSE	TRUE	FALSE	FALSE	FALSE
Mnat_02359	g2215.t1	TRUE	TRUE	TRUE	TRUE	FALSE	FALSE	TRUE	FALSE	FALSE	FALSE
Mnat_02365	g2218.t1	TRUE	TRUE	TRUE	TRUE	FALSE	FALSE	TRUE	FALSE	FALSE	FALSE
Mnat_02367	g2222.t1	TRUE	TRUE	TRUE	TRUE	TRUE	FALSE	FALSE	FALSE	TRUE	TRUE
Mnat_02368	g2228.t1	TRUE	TRUE	TRUE	TRUE	FALSE	TRUE	FALSE	FALSE	FALSE	TRUE
Mnat_02372	g2234.t1	TRUE	TRUE	TRUE	TRUE	FALSE	FALSE	TRUE	FALSE	FALSE	FALSE
Mnat_02376	g2240.t1	TRUE	FALSE	TRUE	FALSE	TRUE	TRUE	FALSE	FALSE	FALSE	TRUE
Mnat_02378	g19793.t2;g19793.t1	TRUE	FALSE	FALSE	TRUE	FALSE	FALSE	TRUE	FALSE	FALSE	FALSE
Mnat_02380	g19794.t1	TRUE	TRUE	TRUE	TRUE	FALSE	TRUE	TRUE	TRUE	FALSE	FALSE
Mnat_02381	g3123.t1;g3123.t2	TRUE	FALSE	FALSE	TRUE	FALSE	TRUE	TRUE	TRUE	FALSE	FALSE
Mnat_02383	g3128.t1	TRUE	TRUE	TRUE	TRUE	FALSE	TRUE	TRUE	TRUE	FALSE	FALSE
Mnat_02385	g3131.t1	TRUE	TRUE	TRUE	TRUE	TRUE	TRUE	FALSE	FALSE	TRUE	TRUE
Mnat_02389	g3135.t1	TRUE	TRUE	TRUE	TRUE	TRUE	FALSE	FALSE	FALSE	FALSE	TRUE
Mnat_02392	g21186.t1	TRUE	TRUE	TRUE	TRUE	TRUE	FALSE	FALSE	FALSE	FALSE	TRUE
Mnat_02393	g21185.t1	TRUE	TRUE	TRUE	TRUE	FALSE	TRUE	TRUE	TRUE	FALSE	FALSE
Mnat_02399	g21173.t1;g21173.t2	TRUE	FALSE	FALSE	TRUE	FALSE	FALSE	FALSE	FALSE	FALSE	FALSE
Mnat_02400	g21172.t3;g21172.t2;g21172.t1;g21172.t4	TRUE	FALSE	FALSE	TRUE	FALSE	FALSE	TRUE	FALSE	FALSE	FALSE
Mnat_02404	g4230.t1	TRUE	FALSE	FALSE	FALSE	TRUE	FALSE	FALSE	FALSE	FALSE	TRUE
Mnat_02405	g4230.t1	TRUE	FALSE	TRUE	FALSE	FALSE	FALSE	TRUE	FALSE	FALSE	FALSE
Mnat_02406	g21161.t1	TRUE	TRUE	TRUE	TRUE	TRUE	TRUE	FALSE	FALSE	FALSE	TRUE
Mnat_02407	g21159.t2	TRUE	TRUE	TRUE	TRUE	TRUE	FALSE	FALSE	FALSE	FALSE	TRUE
Mnat_02409	g12716.t1	TRUE	TRUE	TRUE	TRUE	FALSE	FALSE	TRUE	FALSE	FALSE	FALSE
Mnat_02412	g12719.t1	TRUE	TRUE	TRUE	TRUE	TRUE	FALSE	FALSE	FALSE	FALSE	TRUE
Mnat_02419	g11724.t1	TRUE	TRUE	TRUE	TRUE	FALSE	FALSE	TRUE	FALSE	FALSE	FALSE
Mnat_02420	g11725.t1	TRUE	TRUE	TRUE	TRUE	FALSE	FALSE	TRUE	FALSE	FALSE	FALSE
Mnat_02422	g974.t1	TRUE	TRUE	TRUE	TRUE	FALSE	TRUE	TRUE	TRUE	FALSE	FALSE
Mnat_02427	g972.t1;g972.t3;g972.t2	TRUE	FALSE	FALSE	TRUE	FALSE	TRUE	FALSE	TRUE	FALSE	TRUE
Mnat_02430	g969.t1	TRUE	TRUE	TRUE	TRUE	FALSE	FALSE	TRUE	FALSE	FALSE	FALSE
Mnat_02433	g967.t2;g967.t1;g967.t3	TRUE	FALSE	FALSE	TRUE	FALSE	FALSE	TRUE	FALSE	FALSE	FALSE
Mnat_02435	g965.t1	TRUE	TRUE	TRUE	TRUE	TRUE	FALSE	FALSE	FALSE	TRUE	TRUE
Mnat_02436	g964.t1	TRUE	TRUE	TRUE	TRUE	TRUE	FALSE	FALSE	FALSE	FALSE	TRUE
Mnat_02440	g956.t4	TRUE	TRUE	TRUE	TRUE	FALSE	TRUE	TRUE	TRUE	FALSE	FALSE
Mnat_02441	g956.t1;g956.t3;g956.t2	TRUE	FALSE	FALSE	TRUE	FALSE	FALSE	TRUE	FALSE	FALSE	FALSE
Mnat_02444	g953.t1	TRUE	TRUE	TRUE	TRUE	FALSE	FALSE	FALSE	FALSE	FALSE	FALSE
Mnat_02445	g952.t2;g952.t1	TRUE	FALSE	FALSE	TRUE	FALSE	TRUE	TRUE	TRUE	FALSE	FALSE
Mnat_02447	g950.t1	TRUE	TRUE	TRUE	TRUE	FALSE	TRUE	TRUE	TRUE	FALSE	FALSE
Mnat_02449	g946.t1	TRUE	TRUE	TRUE	TRUE	TRUE	FALSE	FALSE	FALSE	TRUE	TRUE
Mnat_02452	g945.t2;g945.t1	TRUE	FALSE	FALSE	TRUE	TRUE	FALSE	TRUE	FALSE	TRUE	TRUE
Mnat_02453	g944.t1	TRUE	TRUE	TRUE	TRUE	TRUE	FALSE	FALSE	FALSE	FALSE	TRUE
Mnat_02456	g942.t1	TRUE	TRUE	TRUE	TRUE	TRUE	FALSE	FALSE	FALSE	TRUE	TRUE
Mnat_02459	g939.t1	TRUE	TRUE	TRUE	TRUE	TRUE	TRUE	FALSE	FALSE	TRUE	TRUE
Mnat_02461	g938.t1	TRUE	TRUE	TRUE	TRUE	TRUE	FALSE	FALSE	FALSE	FALSE	TRUE
Mnat_02462	g937.t1	TRUE	TRUE	TRUE	TRUE	TRUE	TRUE	FALSE	FALSE	TRUE	TRUE
Mnat_02464	g936.t1;g936.t2	TRUE	FALSE	FALSE	TRUE	FALSE	FALSE	TRUE	FALSE	FALSE	FALSE
Mnat_02465	g935.t4	TRUE	TRUE	TRUE	TRUE	FALSE	FALSE	TRUE	FALSE	FALSE	FALSE
Mnat_02469	g933.t2	TRUE	TRUE	TRUE	TRUE	FALSE	FALSE	TRUE	FALSE	FALSE	FALSE
Mnat_02471	g931.t1	TRUE	TRUE	TRUE	TRUE	FALSE	FALSE	TRUE	FALSE	FALSE	FALSE
Mnat_02473	g928.t3;g928.t1;g928.t2	TRUE	FALSE	FALSE	TRUE	FALSE	TRUE	TRUE	TRUE	FALSE	FALSE
Mnat_02475	g926.t1	TRUE	TRUE	TRUE	TRUE	TRUE	FALSE	FALSE	FALSE	FALSE	TRUE
Mnat_02477	g922.t1	TRUE	TRUE	TRUE	TRUE	FALSE	FALSE	TRUE	FALSE	FALSE	FALSE
Mnat_02478	g22674.t1;g921.t1;g921.t2	TRUE	FALSE	FALSE	TRUE	TRUE	FALSE	FALSE	FALSE	TRUE	TRUE
Mnat_02482	g920.t1;g919.t1	TRUE	FALSE	FALSE	TRUE	FALSE	TRUE	FALSE	TRUE	FALSE	TRUE
Mnat_02485	g913.t1	TRUE	TRUE	TRUE	TRUE	FALSE	FALSE	TRUE	FALSE	FALSE	FALSE
Mnat_02486	g912.t1	TRUE	TRUE	TRUE	TRUE	FALSE	FALSE	TRUE	FALSE	FALSE	FALSE
Mnat_02487	g911.t1;g911.t2	TRUE	FALSE	FALSE	TRUE	TRUE	FALSE	FALSE	FALSE	FALSE	TRUE
Mnat_02488	g910.t3	TRUE	TRUE	TRUE	TRUE	FALSE	FALSE	FALSE	FALSE	FALSE	FALSE
Mnat_02489	g909.t1	TRUE	TRUE	TRUE	TRUE	TRUE	TRUE	FALSE	FALSE	TRUE	TRUE
Mnat_02494	g908.t1	TRUE	TRUE	TRUE	TRUE	FALSE	FALSE	TRUE	FALSE	FALSE	FALSE
Mnat_02502	g906.t1;g906.t2	TRUE	FALSE	FALSE	TRUE	FALSE	FALSE	TRUE	FALSE	FALSE	FALSE
Mnat_02506	g902.t2;g902.t1	TRUE	FALSE	FALSE	TRUE	FALSE	TRUE	TRUE	TRUE	FALSE	FALSE
Mnat_02508	g10436.t1	TRUE	TRUE	TRUE	TRUE	FALSE	FALSE	TRUE	FALSE	FALSE	FALSE
Mnat_02514	g10430.t1	TRUE	TRUE	TRUE	TRUE	FALSE	FALSE	TRUE	FALSE	FALSE	FALSE
Mnat_02515	g10426.t1	TRUE	TRUE	TRUE	TRUE	FALSE	FALSE	TRUE	FALSE	FALSE	FALSE
Mnat_02516	g5098.t1	TRUE	FALSE	FALSE	FALSE	FALSE	TRUE	TRUE	TRUE	FALSE	FALSE
Mnat_02518	g10424.t1	TRUE	TRUE	TRUE	TRUE	FALSE	TRUE	TRUE	TRUE	FALSE	FALSE
Mnat_02520	g18067.t2;g18067.t1	TRUE	FALSE	FALSE	TRUE	TRUE	FALSE	FALSE	FALSE	FALSE	TRUE
Mnat_02521	g18068.t1	TRUE	TRUE	TRUE	TRUE	FALSE	FALSE	TRUE	FALSE	FALSE	FALSE
Mnat_02524	g22452.t1;g4119.t1	TRUE	FALSE	FALSE	FALSE	FALSE	TRUE	TRUE	TRUE	FALSE	FALSE
Mnat_02525	g18077.t1	TRUE	FALSE	FALSE	FALSE	FALSE	FALSE	TRUE	FALSE	FALSE	FALSE
Mnat_02533	g21001.t1;g21001.t2;g21003.t1	TRUE	FALSE	FALSE	TRUE	FALSE	FALSE	TRUE	FALSE	FALSE	FALSE
Mnat_02534	g10520.t1;g17351.t1;g17351.t2;g10520.t2	TRUE	FALSE	FALSE	TRUE	TRUE	TRUE	FALSE	FALSE	FALSE	TRUE
Mnat_02535	g17352.t4	TRUE	TRUE	TRUE	TRUE	FALSE	FALSE	TRUE	FALSE	FALSE	FALSE
Mnat_02536	g17353.t1	TRUE	TRUE	TRUE	TRUE	TRUE	FALSE	FALSE	FALSE	FALSE	TRUE
Mnat_02537	g17355.t1	TRUE	TRUE	TRUE	TRUE	TRUE	TRUE	FALSE	FALSE	FALSE	TRUE
Mnat_02540	g17358.t1	TRUE	TRUE	TRUE	TRUE	FALSE	FALSE	TRUE	FALSE	FALSE	FALSE
Mnat_02541	g17359.t1	TRUE	TRUE	TRUE	TRUE	TRUE	TRUE	FALSE	FALSE	FALSE	TRUE
Mnat_02543	g17360.t1	TRUE	TRUE	TRUE	TRUE	TRUE	FALSE	FALSE	FALSE	TRUE	TRUE
Mnat_02546	g17361.t1	TRUE	TRUE	TRUE	TRUE	FALSE	FALSE	TRUE	FALSE	FALSE	FALSE
Mnat_02548	g17363.t1	TRUE	TRUE	TRUE	TRUE	FALSE	FALSE	TRUE	FALSE	FALSE	FALSE
Mnat_02549	g17364.t3;g17364.t2;g17364.t1	TRUE	FALSE	FALSE	TRUE	TRUE	FALSE	FALSE	FALSE	FALSE	TRUE
Mnat_02550	g17366.t3	TRUE	TRUE	TRUE	TRUE	FALSE	TRUE	TRUE	TRUE	FALSE	FALSE
Mnat_02581	g22412.t1	TRUE	FALSE	FALSE	FALSE	FALSE	FALSE	TRUE	FALSE	FALSE	FALSE
Mnat_02582	g22413.t1	TRUE	TRUE	TRUE	TRUE	TRUE	FALSE	FALSE	FALSE	FALSE	TRUE
Mnat_02583	g22415.t1	TRUE	TRUE	TRUE	TRUE	TRUE	TRUE	FALSE	FALSE	TRUE	TRUE
Mnat_02584	g11887.t1	TRUE	FALSE	FALSE	FALSE	TRUE	TRUE	FALSE	FALSE	TRUE	TRUE
Mnat_02586	g22416.t1	TRUE	TRUE	TRUE	TRUE	FALSE	FALSE	TRUE	FALSE	FALSE	FALSE
Mnat_02590	g22419.t1	TRUE	TRUE	TRUE	TRUE	FALSE	FALSE	TRUE	FALSE	FALSE	FALSE
Mnat_02592	g22420.t1;g22420.t2	TRUE	FALSE	FALSE	TRUE	FALSE	FALSE	TRUE	FALSE	FALSE	FALSE
Mnat_02595	g22423.t1	TRUE	TRUE	TRUE	TRUE	TRUE	FALSE	FALSE	FALSE	FALSE	TRUE
Mnat_02596	g22424.t1	TRUE	TRUE	TRUE	TRUE	TRUE	FALSE	FALSE	FALSE	FALSE	TRUE
Mnat_02611	g22440.t1	TRUE	TRUE	TRUE	TRUE	TRUE	TRUE	FALSE	FALSE	TRUE	TRUE
Mnat_02613	g6459.t3	TRUE	FALSE	FALSE	FALSE	TRUE	FALSE	FALSE	FALSE	TRUE	TRUE
Mnat_02614	g22441.t1	TRUE	TRUE	TRUE	TRUE	FALSE	TRUE	FALSE	FALSE	FALSE	TRUE
Mnat_02616	g22443.t1	TRUE	TRUE	TRUE	TRUE	TRUE	TRUE	FALSE	FALSE	TRUE	TRUE
Mnat_02619	g22446.t1	TRUE	TRUE	TRUE	TRUE	FALSE	FALSE	TRUE	FALSE	FALSE	FALSE
Mnat_02622	g16517.t1	TRUE	FALSE	FALSE	FALSE	FALSE	FALSE	TRUE	FALSE	FALSE	FALSE
Mnat_02625	g22456.t1	TRUE	TRUE	TRUE	TRUE	FALSE	TRUE	TRUE	TRUE	FALSE	FALSE
Mnat_02626	g22861.t1	TRUE	FALSE	FALSE	FALSE	FALSE	TRUE	TRUE	TRUE	FALSE	FALSE
Mnat_02636	g22465.t3	TRUE	TRUE	TRUE	TRUE	FALSE	TRUE	TRUE	TRUE	FALSE	FALSE
Mnat_02638	g22468.t1	TRUE	TRUE	TRUE	TRUE	TRUE	FALSE	FALSE	FALSE	TRUE	TRUE
Mnat_02642	g6186.t1;g22475.t1	TRUE	FALSE	FALSE	TRUE	TRUE	FALSE	FALSE	FALSE	TRUE	TRUE
Mnat_02643	g22476.t1	TRUE	TRUE	TRUE	TRUE	FALSE	FALSE	FALSE	FALSE	FALSE	FALSE
Mnat_02645	g22412.t1	TRUE	FALSE	FALSE	FALSE	FALSE	FALSE	TRUE	FALSE	FALSE	FALSE
Mnat_02646	g22477.t1;g14344.t1	TRUE	FALSE	FALSE	TRUE	FALSE	FALSE	TRUE	FALSE	FALSE	FALSE
Mnat_02647	g22478.t2	TRUE	TRUE	TRUE	TRUE	FALSE	TRUE	FALSE	FALSE	FALSE	TRUE
Mnat_02649	g22480.t3;g22480.t2;g22480.t1	TRUE	FALSE	FALSE	TRUE	TRUE	FALSE	FALSE	FALSE	TRUE	TRUE
Mnat_02654	g22482.t2	TRUE	TRUE	TRUE	TRUE	TRUE	FALSE	FALSE	FALSE	TRUE	TRUE
Mnat_02656	g22484.t1;g22484.t7;g22484.t3;g22484.t2;g22484.t5;g22484.t4;g22484.t6	TRUE	FALSE	FALSE	TRUE	FALSE	FALSE	TRUE	FALSE	FALSE	FALSE
Mnat_02658	g22486.t1	TRUE	TRUE	TRUE	TRUE	TRUE	FALSE	FALSE	FALSE	FALSE	TRUE
Mnat_02660	g22487.t1;g22487.t3;g22487.t2	TRUE	FALSE	FALSE	TRUE	TRUE	FALSE	FALSE	FALSE	FALSE	TRUE
Mnat_02664	g22492.t1	TRUE	TRUE	TRUE	TRUE	FALSE	TRUE	TRUE	TRUE	FALSE	FALSE
Mnat_02667	g22494.t1	TRUE	TRUE	TRUE	TRUE	TRUE	FALSE	FALSE	FALSE	FALSE	TRUE
Mnat_02668	g22495.t1	TRUE	TRUE	TRUE	TRUE	TRUE	FALSE	FALSE	FALSE	FALSE	TRUE
Mnat_02669	g22496.t1	TRUE	TRUE	TRUE	TRUE	TRUE	FALSE	FALSE	FALSE	FALSE	TRUE
Mnat_02671	g22499.t2;g22499.t1;g22499.t3	TRUE	FALSE	FALSE	TRUE	TRUE	FALSE	FALSE	FALSE	TRUE	TRUE
Mnat_02674	g22452.t1;g4119.t1	TRUE	FALSE	FALSE	FALSE	FALSE	FALSE	TRUE	FALSE	FALSE	FALSE
Mnat_02675	g8536.t1	TRUE	FALSE	FALSE	FALSE	FALSE	TRUE	TRUE	TRUE	FALSE	FALSE
Mnat_02680	g2943.t1	TRUE	FALSE	FALSE	FALSE	FALSE	TRUE	TRUE	TRUE	FALSE	FALSE
Mnat_02682	g22503.t2;g22503.t1;g22503.t3	TRUE	FALSE	FALSE	TRUE	FALSE	TRUE	TRUE	TRUE	FALSE	FALSE
Mnat_02683	g22504.t3;g22504.t1;g22504.t2	TRUE	FALSE	FALSE	TRUE	FALSE	FALSE	TRUE	FALSE	FALSE	FALSE
Mnat_02684	g22505.t1	TRUE	TRUE	TRUE	TRUE	TRUE	FALSE	FALSE	FALSE	FALSE	TRUE
Mnat_02685	g11113.t1	TRUE	TRUE	TRUE	TRUE	FALSE	FALSE	TRUE	FALSE	FALSE	FALSE
Mnat_02687	g11115.t1	TRUE	TRUE	TRUE	TRUE	TRUE	TRUE	FALSE	FALSE	TRUE	TRUE
Mnat_02689	g11120.t1	TRUE	TRUE	TRUE	TRUE	FALSE	TRUE	FALSE	TRUE	FALSE	TRUE
Mnat_02692	g11127.t1	TRUE	TRUE	TRUE	TRUE	FALSE	FALSE	TRUE	FALSE	FALSE	FALSE
Mnat_02694	g11128.t1	TRUE	TRUE	TRUE	TRUE	TRUE	FALSE	FALSE	FALSE	TRUE	TRUE
Mnat_02696	g11129.t1;g11129.t2	TRUE	FALSE	FALSE	TRUE	FALSE	FALSE	TRUE	FALSE	FALSE	FALSE
Mnat_02700	g16708.t1	TRUE	FALSE	TRUE	FALSE	TRUE	FALSE	FALSE	FALSE	FALSE	TRUE
Mnat_02705	g14214.t1	TRUE	FALSE	TRUE	FALSE	FALSE	TRUE	TRUE	TRUE	FALSE	FALSE
Mnat_02706	g14217.t1	TRUE	TRUE	TRUE	TRUE	TRUE	TRUE	FALSE	FALSE	TRUE	TRUE
Mnat_02707	g14218.t2;g14218.t1	TRUE	FALSE	FALSE	TRUE	TRUE	FALSE	FALSE	FALSE	TRUE	TRUE
Mnat_02713	g14224.t1	TRUE	TRUE	TRUE	TRUE	FALSE	FALSE	TRUE	FALSE	FALSE	FALSE
Mnat_02717	g14228.t1;g14228.t2	TRUE	FALSE	FALSE	TRUE	FALSE	TRUE	TRUE	TRUE	FALSE	FALSE
Mnat_02718	g14229.t1	TRUE	TRUE	TRUE	TRUE	FALSE	FALSE	TRUE	FALSE	FALSE	FALSE
Mnat_02721	g14232.t1	TRUE	TRUE	TRUE	TRUE	TRUE	FALSE	FALSE	FALSE	TRUE	TRUE
Mnat_02724	g14236.t1;g14236.t2	TRUE	FALSE	FALSE	TRUE	TRUE	FALSE	FALSE	FALSE	TRUE	TRUE
Mnat_02728	g14243.t1	TRUE	TRUE	TRUE	TRUE	TRUE	FALSE	FALSE	FALSE	TRUE	TRUE
Mnat_02730	g14246.t1	TRUE	FALSE	TRUE	FALSE	FALSE	TRUE	FALSE	FALSE	FALSE	TRUE
Mnat_02733	g14249.t1	TRUE	TRUE	TRUE	TRUE	FALSE	TRUE	FALSE	TRUE	FALSE	TRUE
Mnat_02734	g14250.t1	TRUE	FALSE	FALSE	FALSE	FALSE	FALSE	TRUE	FALSE	FALSE	FALSE
Mnat_02738	g14254.t1;g14254.t2	TRUE	FALSE	FALSE	TRUE	TRUE	FALSE	FALSE	FALSE	FALSE	TRUE
Mnat_02739	g2210.t1	TRUE	FALSE	FALSE	FALSE	FALSE	FALSE	TRUE	FALSE	FALSE	FALSE
Mnat_02746	g19716.t1	TRUE	FALSE	TRUE	FALSE	TRUE	TRUE	FALSE	FALSE	TRUE	TRUE
Mnat_02755	g14272.t1;g14272.t2	TRUE	FALSE	FALSE	TRUE	TRUE	FALSE	FALSE	FALSE	FALSE	TRUE
Mnat_02756	g14273.t1	TRUE	TRUE	TRUE	TRUE	TRUE	TRUE	FALSE	FALSE	TRUE	TRUE
Mnat_02757	g14274.t1	TRUE	TRUE	TRUE	TRUE	TRUE	FALSE	FALSE	FALSE	TRUE	TRUE
Mnat_02759	g14275.t1	TRUE	TRUE	TRUE	TRUE	FALSE	FALSE	TRUE	FALSE	FALSE	FALSE
Mnat_02777	g20491.t1	TRUE	FALSE	FALSE	FALSE	FALSE	FALSE	TRUE	FALSE	FALSE	FALSE
Mnat_02784	g13634.t1	TRUE	TRUE	TRUE	TRUE	TRUE	FALSE	FALSE	FALSE	TRUE	TRUE
Mnat_02785	g13633.t1	TRUE	TRUE	TRUE	TRUE	TRUE	FALSE	FALSE	FALSE	TRUE	TRUE
Mnat_02790	g13628.t1	TRUE	TRUE	TRUE	TRUE	TRUE	FALSE	FALSE	FALSE	TRUE	TRUE
Mnat_02792	g13626.t1	TRUE	TRUE	TRUE	TRUE	TRUE	FALSE	FALSE	FALSE	TRUE	TRUE
Mnat_02808	g13621.t1;g13621.t2	TRUE	FALSE	FALSE	TRUE	FALSE	FALSE	FALSE	FALSE	FALSE	FALSE
Mnat_02819	g13617.t1	TRUE	TRUE	TRUE	TRUE	TRUE	FALSE	FALSE	FALSE	FALSE	TRUE
Mnat_02823	g13616.t1;g13616.t2	TRUE	FALSE	FALSE	TRUE	TRUE	FALSE	FALSE	FALSE	FALSE	TRUE
Mnat_02824	g13615.t1	TRUE	TRUE	TRUE	TRUE	FALSE	FALSE	TRUE	FALSE	FALSE	FALSE
Mnat_02825	g13614.t2	TRUE	TRUE	TRUE	TRUE	FALSE	FALSE	TRUE	FALSE	FALSE	FALSE
Mnat_02827	g13610.t1	TRUE	TRUE	TRUE	TRUE	TRUE	FALSE	FALSE	FALSE	TRUE	TRUE
Mnat_02828	g13608.t1;g13608.t2	TRUE	FALSE	FALSE	TRUE	FALSE	FALSE	TRUE	FALSE	FALSE	FALSE
Mnat_02831	g13605.t1	TRUE	TRUE	TRUE	TRUE	FALSE	FALSE	TRUE	FALSE	FALSE	FALSE
Mnat_02832	g13604.t1	TRUE	TRUE	TRUE	TRUE	FALSE	FALSE	TRUE	FALSE	FALSE	FALSE
Mnat_02833	g13599.t1	TRUE	TRUE	TRUE	TRUE	FALSE	FALSE	TRUE	FALSE	FALSE	FALSE
Mnat_02837	g13580.t2;g13580.t1	TRUE	FALSE	FALSE	FALSE	FALSE	FALSE	TRUE	FALSE	FALSE	FALSE
Mnat_02838	g13597.t3	TRUE	TRUE	TRUE	TRUE	FALSE	FALSE	TRUE	FALSE	FALSE	FALSE
Mnat_02840	g13596.t2;g13596.t1	TRUE	FALSE	FALSE	FALSE	FALSE	FALSE	TRUE	FALSE	FALSE	FALSE
Mnat_02841	g13595.t2;g13595.t1	TRUE	FALSE	FALSE	TRUE	FALSE	FALSE	TRUE	FALSE	FALSE	FALSE
Mnat_02843	g13594.t1	TRUE	TRUE	TRUE	TRUE	FALSE	FALSE	FALSE	FALSE	FALSE	FALSE
Mnat_02844	g13593.t1	TRUE	TRUE	TRUE	TRUE	FALSE	FALSE	TRUE	FALSE	FALSE	FALSE
Mnat_02845	g12126.t1	TRUE	FALSE	FALSE	FALSE	FALSE	TRUE	TRUE	TRUE	FALSE	FALSE
Mnat_02851	g13587.t1	TRUE	TRUE	TRUE	TRUE	FALSE	FALSE	TRUE	FALSE	FALSE	FALSE
Mnat_02852	g20491.t1	TRUE	FALSE	FALSE	FALSE	FALSE	FALSE	TRUE	FALSE	FALSE	FALSE
Mnat_02858	g13227.t1	TRUE	TRUE	TRUE	TRUE	TRUE	FALSE	FALSE	FALSE	TRUE	TRUE
Mnat_02861	g13233.t1	TRUE	TRUE	TRUE	TRUE	FALSE	FALSE	TRUE	FALSE	FALSE	FALSE
Mnat_02864	g13236.t1	TRUE	TRUE	TRUE	TRUE	TRUE	FALSE	FALSE	FALSE	TRUE	TRUE
Mnat_02865	g13238.t1	TRUE	TRUE	TRUE	TRUE	TRUE	FALSE	FALSE	FALSE	TRUE	TRUE
Mnat_02866	g13240.t1	TRUE	TRUE	TRUE	TRUE	TRUE	FALSE	FALSE	FALSE	TRUE	TRUE
Mnat_02868	g13241.t1	TRUE	TRUE	TRUE	TRUE	FALSE	FALSE	TRUE	FALSE	FALSE	FALSE
Mnat_02869	g13242.t1	TRUE	TRUE	TRUE	TRUE	FALSE	FALSE	TRUE	FALSE	FALSE	FALSE
Mnat_02872	g13245.t1	TRUE	TRUE	TRUE	TRUE	FALSE	FALSE	TRUE	FALSE	FALSE	FALSE
Mnat_02876	g13246.t1	TRUE	TRUE	TRUE	TRUE	FALSE	TRUE	TRUE	TRUE	FALSE	FALSE
Mnat_02877	g13249.t1	TRUE	TRUE	TRUE	TRUE	FALSE	FALSE	TRUE	FALSE	FALSE	FALSE
Mnat_02880	g2240.t1	TRUE	FALSE	FALSE	FALSE	FALSE	FALSE	TRUE	FALSE	FALSE	FALSE
Mnat_02885	g13257.t2;g13257.t1	TRUE	FALSE	FALSE	TRUE	TRUE	FALSE	FALSE	FALSE	TRUE	TRUE
Mnat_02890	g13262.t1	TRUE	TRUE	TRUE	TRUE	TRUE	FALSE	TRUE	FALSE	TRUE	TRUE
Mnat_02892	g13264.t1	TRUE	TRUE	TRUE	TRUE	FALSE	FALSE	TRUE	FALSE	FALSE	FALSE
Mnat_02893	g13265.t3;g13265.t2;g13265.t1	TRUE	FALSE	FALSE	TRUE	TRUE	TRUE	FALSE	FALSE	TRUE	TRUE
Mnat_02894	g13266.t1	TRUE	TRUE	TRUE	TRUE	TRUE	FALSE	FALSE	FALSE	TRUE	TRUE
Mnat_02895	g13267.t1	TRUE	TRUE	TRUE	TRUE	TRUE	FALSE	FALSE	FALSE	FALSE	TRUE
Mnat_02896	g13270.t1	TRUE	TRUE	TRUE	TRUE	TRUE	FALSE	FALSE	FALSE	TRUE	TRUE
Mnat_02897	g13271.t1	TRUE	TRUE	TRUE	TRUE	TRUE	TRUE	FALSE	FALSE	TRUE	TRUE
Mnat_02898	g13272.t1	TRUE	TRUE	TRUE	TRUE	TRUE	TRUE	FALSE	FALSE	FALSE	TRUE
Mnat_02899	g13273.t2;g13273.t1	TRUE	FALSE	FALSE	TRUE	TRUE	FALSE	TRUE	FALSE	FALSE	TRUE
Mnat_02900	g13274.t2;g13274.t1	TRUE	FALSE	FALSE	FALSE	FALSE	TRUE	FALSE	TRUE	FALSE	FALSE
Mnat_02905	g18272.t1	TRUE	TRUE	TRUE	TRUE	TRUE	FALSE	TRUE	FALSE	TRUE	FALSE
Mnat_02906	g18271.t1	TRUE	TRUE	TRUE	TRUE	FALSE	FALSE	TRUE	FALSE	FALSE	FALSE
Mnat_02910	g11398.t2;g11398.t1;g6618.t1	TRUE	FALSE	FALSE	TRUE	FALSE	FALSE	TRUE	FALSE	FALSE	FALSE
Mnat_02914	g11400.t1	TRUE	TRUE	TRUE	TRUE	FALSE	TRUE	TRUE	TRUE	FALSE	FALSE
Mnat_02915	g16517.t1	TRUE	FALSE	FALSE	FALSE	FALSE	FALSE	TRUE	FALSE	FALSE	FALSE
Mnat_02922	g13880.t1	TRUE	TRUE	TRUE	TRUE	FALSE	TRUE	FALSE	FALSE	FALSE	TRUE
Mnat_02924	g23437.t1	TRUE	TRUE	TRUE	TRUE	FALSE	FALSE	TRUE	FALSE	FALSE	FALSE
Mnat_02928	g7477.t1	TRUE	FALSE	FALSE	FALSE	FALSE	TRUE	TRUE	TRUE	FALSE	FALSE
Mnat_02929	g13875.t2;g13875.t1	TRUE	FALSE	FALSE	TRUE	FALSE	TRUE	TRUE	TRUE	FALSE	FALSE
Mnat_02932	g13873.t1;g13873.t2	TRUE	FALSE	FALSE	TRUE	FALSE	TRUE	TRUE	TRUE	FALSE	FALSE
Mnat_02935	g13871.t1;g13871.t2	TRUE	FALSE	FALSE	TRUE	TRUE	TRUE	FALSE	FALSE	TRUE	TRUE
Mnat_02936	g13870.t1;g13870.t2	TRUE	FALSE	FALSE	TRUE	FALSE	FALSE	TRUE	FALSE	FALSE	FALSE
Mnat_02938	g12083.t1	TRUE	FALSE	TRUE	FALSE	TRUE	FALSE	FALSE	FALSE	FALSE	TRUE
Mnat_02939	g2849.t1	TRUE	TRUE	TRUE	TRUE	TRUE	FALSE	FALSE	FALSE	FALSE	TRUE
Mnat_02940	g2850.t2;g2850.t1	TRUE	FALSE	FALSE	TRUE	TRUE	FALSE	FALSE	FALSE	TRUE	TRUE
Mnat_02941	g2851.t1	TRUE	TRUE	TRUE	TRUE	TRUE	FALSE	FALSE	FALSE	TRUE	TRUE
Mnat_02942	g2852.t1;g2852.t2	TRUE	FALSE	FALSE	TRUE	TRUE	FALSE	FALSE	FALSE	TRUE	TRUE
Mnat_02944	g2854.t1	TRUE	TRUE	TRUE	TRUE	TRUE	FALSE	FALSE	FALSE	TRUE	TRUE
Mnat_02959	g2862.t1	TRUE	TRUE	TRUE	TRUE	FALSE	TRUE	TRUE	TRUE	FALSE	FALSE
Mnat_02961	g2863.t2;g2863.t1	TRUE	FALSE	FALSE	TRUE	TRUE	FALSE	FALSE	FALSE	TRUE	TRUE
Mnat_02963	g2865.t1	TRUE	TRUE	TRUE	TRUE	TRUE	FALSE	FALSE	FALSE	FALSE	TRUE
Mnat_02965	g2866.t1	TRUE	FALSE	FALSE	FALSE	TRUE	TRUE	FALSE	FALSE	FALSE	TRUE
Mnat_02970	g17385.t1	TRUE	TRUE	TRUE	TRUE	FALSE	TRUE	TRUE	TRUE	FALSE	FALSE
Mnat_02974	g17391.t1	TRUE	TRUE	TRUE	TRUE	TRUE	FALSE	FALSE	FALSE	TRUE	TRUE
Mnat_02975	g17396.t1	TRUE	TRUE	TRUE	TRUE	TRUE	FALSE	FALSE	FALSE	TRUE	TRUE
Mnat_02976	g17397.t2;g17397.t3;g17397.t1	TRUE	FALSE	FALSE	TRUE	FALSE	TRUE	FALSE	TRUE	FALSE	TRUE
Mnat_02980	g17398.t1	TRUE	TRUE	TRUE	TRUE	TRUE	FALSE	FALSE	FALSE	TRUE	TRUE
Mnat_02981	g17400.t1	TRUE	TRUE	TRUE	TRUE	FALSE	FALSE	TRUE	FALSE	FALSE	FALSE
Mnat_02982	g17402.t1	TRUE	TRUE	TRUE	TRUE	FALSE	FALSE	TRUE	FALSE	FALSE	FALSE
Mnat_02986	g19082.t1	TRUE	TRUE	TRUE	TRUE	TRUE	FALSE	FALSE	FALSE	TRUE	TRUE
Mnat_02987	g19084.t1	TRUE	TRUE	TRUE	TRUE	TRUE	TRUE	FALSE	FALSE	TRUE	TRUE
Mnat_02994	g7635.t2;g7635.t1	TRUE	FALSE	FALSE	TRUE	FALSE	TRUE	TRUE	TRUE	FALSE	FALSE
Mnat_02995	g7636.t1;g7636.t2	TRUE	FALSE	FALSE	TRUE	FALSE	TRUE	FALSE	FALSE	FALSE	TRUE
Mnat_02996	g7638.t1	TRUE	TRUE	TRUE	TRUE	FALSE	FALSE	TRUE	FALSE	FALSE	FALSE
Mnat_02997	g7639.t1	TRUE	TRUE	TRUE	TRUE	FALSE	FALSE	TRUE	FALSE	FALSE	FALSE
Mnat_02999	g9957.t1	TRUE	TRUE	TRUE	TRUE	FALSE	FALSE	TRUE	FALSE	FALSE	FALSE
Mnat_03002	g9960.t1	TRUE	TRUE	TRUE	TRUE	FALSE	TRUE	FALSE	TRUE	FALSE	FALSE
Mnat_03004	g21441.t1	TRUE	FALSE	FALSE	FALSE	FALSE	FALSE	TRUE	FALSE	FALSE	FALSE
Mnat_03005	g20991.t1	TRUE	TRUE	TRUE	TRUE	FALSE	TRUE	TRUE	TRUE	FALSE	FALSE
Mnat_03010	g20982.t1	TRUE	TRUE	TRUE	TRUE	TRUE	FALSE	FALSE	FALSE	FALSE	TRUE
Mnat_03011	g20981.t1	TRUE	TRUE	TRUE	TRUE	TRUE	FALSE	FALSE	FALSE	TRUE	TRUE
Mnat_03012	g8117.t1	TRUE	FALSE	FALSE	FALSE	FALSE	TRUE	TRUE	TRUE	FALSE	FALSE
Mnat_03017	g20973.t1	TRUE	TRUE	TRUE	TRUE	TRUE	FALSE	FALSE	FALSE	TRUE	TRUE
Mnat_03021	g20961.t1;g20961.t2	TRUE	FALSE	FALSE	TRUE	TRUE	TRUE	FALSE	TRUE	TRUE	TRUE
Mnat_03026	g19333.t1	TRUE	TRUE	TRUE	TRUE	TRUE	FALSE	FALSE	FALSE	TRUE	TRUE
Mnat_03027	g19332.t1	TRUE	TRUE	TRUE	TRUE	FALSE	FALSE	TRUE	FALSE	FALSE	FALSE
Mnat_03028	g19331.t1;g19331.t2	TRUE	FALSE	FALSE	TRUE	TRUE	FALSE	FALSE	FALSE	FALSE	TRUE
Mnat_03031	g3368.t1	TRUE	FALSE	FALSE	FALSE	FALSE	TRUE	TRUE	TRUE	FALSE	FALSE
Mnat_03033	g19329.t1;g19329.t2	TRUE	FALSE	FALSE	TRUE	FALSE	TRUE	TRUE	TRUE	FALSE	FALSE
Mnat_03035	g19328.t1;g19328.t2	TRUE	FALSE	FALSE	TRUE	FALSE	FALSE	TRUE	FALSE	FALSE	FALSE
Mnat_03036	g2210.t1	TRUE	FALSE	FALSE	FALSE	FALSE	TRUE	FALSE	TRUE	FALSE	FALSE
Mnat_03043	g10794.t1	TRUE	FALSE	FALSE	FALSE	FALSE	FALSE	TRUE	FALSE	FALSE	FALSE
Mnat_03045	g6447.t1;g6449.t1;g6449.t3;g6449.t2	TRUE	FALSE	FALSE	TRUE	FALSE	TRUE	TRUE	TRUE	FALSE	FALSE
Mnat_03051	g6455.t1	TRUE	TRUE	TRUE	TRUE	FALSE	FALSE	TRUE	FALSE	FALSE	FALSE
Mnat_03052	g6457.t1	TRUE	TRUE	TRUE	TRUE	FALSE	FALSE	TRUE	FALSE	FALSE	FALSE
Mnat_03054	g6459.t3	TRUE	FALSE	TRUE	FALSE	FALSE	TRUE	TRUE	TRUE	FALSE	FALSE
Mnat_03056	g6461.t1;g6461.t2	TRUE	FALSE	FALSE	TRUE	FALSE	FALSE	TRUE	FALSE	FALSE	FALSE
Mnat_03059	g6466.t2	TRUE	TRUE	TRUE	TRUE	TRUE	FALSE	FALSE	FALSE	TRUE	TRUE
Mnat_03062	g6470.t1	TRUE	TRUE	TRUE	TRUE	TRUE	FALSE	FALSE	FALSE	TRUE	TRUE
Mnat_03064	g6471.t2	TRUE	TRUE	TRUE	TRUE	TRUE	TRUE	FALSE	FALSE	TRUE	TRUE
Mnat_03066	g6473.t1;g6475.t1;g6476.t1;g6476.t2	TRUE	FALSE	FALSE	TRUE	TRUE	TRUE	FALSE	FALSE	TRUE	TRUE
Mnat_03067	g6477.t1	TRUE	TRUE	TRUE	TRUE	FALSE	FALSE	TRUE	FALSE	FALSE	FALSE
Mnat_03071	g6822.t1	TRUE	TRUE	TRUE	TRUE	FALSE	FALSE	TRUE	FALSE	FALSE	FALSE
Mnat_03073	g6828.t1	TRUE	TRUE	TRUE	TRUE	FALSE	TRUE	TRUE	TRUE	FALSE	FALSE
Mnat_03074	g15166.t1	TRUE	FALSE	FALSE	FALSE	FALSE	FALSE	TRUE	FALSE	FALSE	FALSE
Mnat_03075	g6829.t1	TRUE	TRUE	TRUE	TRUE	TRUE	FALSE	FALSE	FALSE	FALSE	TRUE
Mnat_03082	g2210.t1	TRUE	FALSE	FALSE	FALSE	FALSE	FALSE	TRUE	FALSE	FALSE	FALSE
Mnat_03088	g11887.t1	TRUE	FALSE	FALSE	FALSE	FALSE	TRUE	TRUE	TRUE	FALSE	FALSE
Mnat_03090	g4697.t1	TRUE	TRUE	TRUE	TRUE	TRUE	TRUE	FALSE	FALSE	TRUE	TRUE
Mnat_03097	g20491.t1	TRUE	FALSE	FALSE	FALSE	FALSE	TRUE	TRUE	TRUE	FALSE	FALSE
Mnat_03104	g4684.t1	TRUE	TRUE	TRUE	TRUE	FALSE	FALSE	TRUE	FALSE	FALSE	FALSE
Mnat_03106	g4682.t3	TRUE	TRUE	TRUE	TRUE	TRUE	FALSE	FALSE	FALSE	FALSE	TRUE
Mnat_03110	g4678.t1	TRUE	TRUE	TRUE	TRUE	FALSE	FALSE	TRUE	FALSE	FALSE	FALSE
Mnat_03113	g4673.t1	TRUE	FALSE	TRUE	FALSE	FALSE	TRUE	FALSE	TRUE	FALSE	FALSE
Mnat_03115	g12126.t1	TRUE	FALSE	FALSE	FALSE	FALSE	FALSE	TRUE	FALSE	FALSE	FALSE
Mnat_03123	g20928.t1	TRUE	TRUE	TRUE	TRUE	FALSE	TRUE	TRUE	TRUE	FALSE	FALSE
Mnat_03125	g20931.t1;g20931.t2	TRUE	FALSE	FALSE	TRUE	FALSE	FALSE	TRUE	FALSE	FALSE	FALSE
Mnat_03126	g20932.t2;g20932.t1	TRUE	FALSE	FALSE	TRUE	TRUE	FALSE	FALSE	FALSE	FALSE	TRUE
Mnat_03127	g20933.t1	TRUE	TRUE	TRUE	TRUE	TRUE	FALSE	FALSE	FALSE	TRUE	TRUE
Mnat_03130	g20934.t1	TRUE	TRUE	TRUE	TRUE	TRUE	TRUE	FALSE	FALSE	TRUE	TRUE
Mnat_03133	g16415.t1	TRUE	FALSE	TRUE	FALSE	FALSE	TRUE	TRUE	TRUE	FALSE	FALSE
Mnat_03136	g20937.t1	TRUE	TRUE	TRUE	TRUE	FALSE	FALSE	TRUE	FALSE	FALSE	FALSE
Mnat_03138	g20939.t2;g20939.t1	TRUE	FALSE	FALSE	TRUE	FALSE	FALSE	TRUE	FALSE	FALSE	FALSE
Mnat_03147	g2345.t1	TRUE	FALSE	TRUE	FALSE	FALSE	FALSE	TRUE	FALSE	FALSE	FALSE
Mnat_03154	g7477.t1	TRUE	FALSE	FALSE	FALSE	FALSE	TRUE	FALSE	TRUE	FALSE	FALSE
Mnat_03155	g7477.t1	TRUE	FALSE	FALSE	FALSE	FALSE	FALSE	TRUE	FALSE	FALSE	FALSE
Mnat_03158	g14405.t1	TRUE	TRUE	TRUE	TRUE	TRUE	FALSE	FALSE	FALSE	FALSE	TRUE
Mnat_03159	g14404.t1	TRUE	TRUE	TRUE	TRUE	FALSE	FALSE	TRUE	FALSE	FALSE	FALSE
Mnat_03164	g14402.t1	TRUE	TRUE	TRUE	TRUE	FALSE	TRUE	TRUE	TRUE	FALSE	FALSE
Mnat_03166	g14401.t1;g14401.t2	TRUE	FALSE	FALSE	TRUE	FALSE	TRUE	TRUE	TRUE	FALSE	FALSE
Mnat_03172	g14397.t1	TRUE	TRUE	TRUE	TRUE	FALSE	FALSE	TRUE	FALSE	FALSE	FALSE
Mnat_03176	g14385.t1;g14385.t2	TRUE	FALSE	FALSE	FALSE	FALSE	FALSE	TRUE	FALSE	FALSE	FALSE
Mnat_03180	g20005.t2;g20005.t1;g20005.t7;g20005.t5;g20005.t3;g20005.t6;g20005.t4	TRUE	FALSE	FALSE	TRUE	FALSE	FALSE	TRUE	FALSE	FALSE	FALSE
Mnat_03181	g12221.t3;g12221.t2;g12221.t1	TRUE	FALSE	FALSE	FALSE	FALSE	FALSE	TRUE	FALSE	FALSE	FALSE
Mnat_03183	g19995.t2;g19995.t4;g19995.t3;g19995.t1	TRUE	FALSE	FALSE	TRUE	FALSE	FALSE	TRUE	FALSE	FALSE	FALSE
Mnat_03184	g19994.t1	TRUE	TRUE	TRUE	TRUE	TRUE	FALSE	FALSE	FALSE	TRUE	TRUE
Mnat_03187	g19991.t12;g19991.t4;g19991.t2;g19991.t1;g19991.t7;g19991.t6;g19991.t8;g19991.t9;g19991.t11	TRUE	FALSE	FALSE	TRUE	FALSE	FALSE	TRUE	FALSE	FALSE	FALSE
Mnat_03189	g19990.t1;g19990.t2	TRUE	FALSE	FALSE	TRUE	TRUE	TRUE	FALSE	FALSE	TRUE	TRUE
Mnat_03195	g19984.t1	TRUE	TRUE	TRUE	TRUE	FALSE	FALSE	TRUE	FALSE	FALSE	FALSE
Mnat_03196	g19983.t1	TRUE	TRUE	TRUE	TRUE	TRUE	FALSE	FALSE	FALSE	TRUE	TRUE
Mnat_03201	g11892.t1;g19974.t2;g19974.t1	TRUE	FALSE	FALSE	TRUE	TRUE	FALSE	FALSE	FALSE	TRUE	TRUE
Mnat_03202	g19972.t1;g19972.t2	TRUE	FALSE	FALSE	TRUE	FALSE	FALSE	TRUE	FALSE	FALSE	FALSE
Mnat_03204	g19969.t1;g19969.t2	TRUE	FALSE	FALSE	TRUE	TRUE	TRUE	FALSE	FALSE	FALSE	TRUE
Mnat_03208	g19965.t1;g19965.t2	TRUE	FALSE	FALSE	FALSE	TRUE	FALSE	FALSE	FALSE	TRUE	TRUE
Mnat_03211	g19961.t1	TRUE	TRUE	TRUE	TRUE	TRUE	FALSE	TRUE	FALSE	TRUE	FALSE
Mnat_03215	g19955.t2;g19955.t1	TRUE	FALSE	FALSE	TRUE	FALSE	FALSE	TRUE	FALSE	FALSE	FALSE
Mnat_03216	g22816.t2;g22816.t1;g22816.t3	TRUE	FALSE	FALSE	FALSE	TRUE	TRUE	FALSE	FALSE	TRUE	TRUE
Mnat_03219	g19950.t1	TRUE	TRUE	TRUE	TRUE	FALSE	FALSE	TRUE	FALSE	FALSE	FALSE
Mnat_03222	g18389.t1	TRUE	TRUE	TRUE	TRUE	TRUE	FALSE	TRUE	FALSE	TRUE	TRUE
Mnat_03225	g18394.t1;g18394.t2	TRUE	FALSE	FALSE	TRUE	TRUE	FALSE	TRUE	FALSE	TRUE	TRUE
Mnat_03227	g18398.t1;g18395.t1;g18397.t1	TRUE	FALSE	FALSE	TRUE	FALSE	FALSE	TRUE	FALSE	FALSE	FALSE
Mnat_03228	g18399.t2	TRUE	TRUE	TRUE	TRUE	TRUE	FALSE	TRUE	FALSE	TRUE	TRUE
Mnat_03229	g18401.t1	TRUE	TRUE	TRUE	TRUE	TRUE	FALSE	TRUE	FALSE	TRUE	FALSE
Mnat_03230	g18402.t2	TRUE	TRUE	TRUE	TRUE	TRUE	FALSE	TRUE	FALSE	TRUE	TRUE
Mnat_03235	g10238.t2;g10238.t1	TRUE	FALSE	FALSE	TRUE	FALSE	FALSE	TRUE	FALSE	FALSE	FALSE
Mnat_03237	g10243.t1	TRUE	TRUE	TRUE	TRUE	FALSE	TRUE	TRUE	TRUE	FALSE	FALSE
Mnat_03238	g10244.t1	TRUE	TRUE	TRUE	TRUE	FALSE	FALSE	TRUE	FALSE	FALSE	FALSE
Mnat_03245	g11531.t1;g11531.t2	TRUE	FALSE	FALSE	FALSE	FALSE	FALSE	TRUE	FALSE	FALSE	FALSE
Mnat_03247	g11480.t2;g11480.t5	TRUE	FALSE	FALSE	TRUE	FALSE	TRUE	TRUE	TRUE	FALSE	FALSE
Mnat_03248	g11228.t2;g11228.t3;g11228.t4;g11228.t1	TRUE	FALSE	FALSE	TRUE	TRUE	FALSE	FALSE	FALSE	TRUE	TRUE
Mnat_03250	g22452.t1;g4119.t1	TRUE	FALSE	FALSE	FALSE	FALSE	FALSE	TRUE	FALSE	FALSE	FALSE
Mnat_03258	g16953.t1	TRUE	TRUE	TRUE	TRUE	TRUE	FALSE	FALSE	FALSE	FALSE	TRUE
Mnat_03259	g16955.t1	TRUE	TRUE	TRUE	TRUE	TRUE	TRUE	FALSE	FALSE	TRUE	TRUE
Mnat_03261	g16958.t1;g16958.t3	TRUE	FALSE	FALSE	TRUE	FALSE	FALSE	TRUE	FALSE	FALSE	FALSE
Mnat_03262	g16959.t1	TRUE	TRUE	TRUE	TRUE	TRUE	TRUE	FALSE	FALSE	FALSE	TRUE
Mnat_03263	g16960.t1	TRUE	TRUE	TRUE	TRUE	TRUE	TRUE	FALSE	FALSE	TRUE	TRUE
Mnat_03267	g16974.t1	TRUE	TRUE	TRUE	TRUE	FALSE	TRUE	TRUE	TRUE	FALSE	FALSE
Mnat_03268	g16975.t1	TRUE	TRUE	TRUE	TRUE	FALSE	TRUE	TRUE	TRUE	FALSE	FALSE
Mnat_03269	g16978.t3;g16978.t4;g16978.t2;g16978.t5;g16978.t1	TRUE	FALSE	FALSE	TRUE	FALSE	FALSE	TRUE	FALSE	FALSE	FALSE
Mnat_03270	g16980.t1	TRUE	TRUE	TRUE	TRUE	TRUE	FALSE	FALSE	FALSE	FALSE	TRUE
Mnat_03271	g16981.t1	TRUE	FALSE	FALSE	FALSE	TRUE	FALSE	FALSE	FALSE	FALSE	TRUE
Mnat_03272	g16982.t1	TRUE	TRUE	TRUE	TRUE	FALSE	FALSE	TRUE	FALSE	FALSE	FALSE
Mnat_03274	g19583.t1;g19582.t1;g19581.t1;g19581.t2	TRUE	FALSE	FALSE	FALSE	FALSE	TRUE	FALSE	TRUE	FALSE	TRUE
Mnat_03276	g19584.t1	TRUE	TRUE	TRUE	TRUE	FALSE	FALSE	TRUE	FALSE	FALSE	FALSE
Mnat_03280	g21391.t2	TRUE	TRUE	TRUE	TRUE	FALSE	FALSE	TRUE	FALSE	FALSE	FALSE
Mnat_03284	g22452.t1;g4119.t1	TRUE	FALSE	FALSE	FALSE	FALSE	TRUE	TRUE	TRUE	FALSE	FALSE
Mnat_03290	g1823.t1	TRUE	FALSE	FALSE	FALSE	FALSE	TRUE	FALSE	TRUE	FALSE	FALSE
Mnat_03302	g6443.t1	TRUE	TRUE	TRUE	TRUE	TRUE	TRUE	FALSE	FALSE	TRUE	TRUE
Mnat_03307	g2091.t1	TRUE	TRUE	TRUE	TRUE	TRUE	FALSE	FALSE	FALSE	FALSE	TRUE
Mnat_03310	g2094.t1	TRUE	TRUE	TRUE	TRUE	FALSE	FALSE	TRUE	FALSE	FALSE	FALSE
Mnat_03313	g2103.t1	TRUE	TRUE	TRUE	TRUE	FALSE	TRUE	TRUE	TRUE	FALSE	FALSE
Mnat_03314	g2104.t2;g1670.t2;g1670.t1;g2104.t1	TRUE	FALSE	FALSE	TRUE	FALSE	TRUE	TRUE	TRUE	FALSE	FALSE
Mnat_03316	g2105.t1	TRUE	TRUE	TRUE	TRUE	FALSE	TRUE	TRUE	TRUE	FALSE	FALSE
Mnat_03317	g2107.t1	TRUE	TRUE	TRUE	TRUE	FALSE	FALSE	TRUE	FALSE	FALSE	FALSE
Mnat_03321	g2111.t1	TRUE	TRUE	TRUE	TRUE	FALSE	TRUE	FALSE	FALSE	FALSE	TRUE
Mnat_03324	g2114.t5;g2114.t7;g2114.t1;g2114.t6;g2114.t4;g2114.t2;g2114.t3	TRUE	FALSE	FALSE	TRUE	FALSE	TRUE	TRUE	TRUE	FALSE	FALSE
Mnat_03325	g2121.t1	TRUE	FALSE	TRUE	FALSE	FALSE	FALSE	TRUE	FALSE	FALSE	FALSE
Mnat_03326	g2121.t1	TRUE	FALSE	FALSE	FALSE	FALSE	TRUE	TRUE	TRUE	FALSE	FALSE
Mnat_03327	g2122.t3;g2122.t2;g2122.t1	TRUE	FALSE	FALSE	TRUE	FALSE	TRUE	TRUE	TRUE	FALSE	FALSE
Mnat_03329	g9532.t3;g9532.t2;g9532.t4;g9532.t1	TRUE	FALSE	FALSE	TRUE	FALSE	FALSE	TRUE	FALSE	FALSE	FALSE
Mnat_03330	g9536.t1	TRUE	TRUE	TRUE	TRUE	FALSE	TRUE	TRUE	FALSE	FALSE	TRUE
Mnat_03332	g9538.t1	TRUE	TRUE	TRUE	TRUE	TRUE	FALSE	FALSE	FALSE	FALSE	TRUE
Mnat_03333	g9540.t2;g9540.t1	TRUE	FALSE	FALSE	TRUE	FALSE	TRUE	TRUE	TRUE	FALSE	FALSE
Mnat_03334	g9542.t1	TRUE	TRUE	TRUE	TRUE	FALSE	FALSE	FALSE	FALSE	FALSE	FALSE
Mnat_03340	g9546.t1	TRUE	TRUE	TRUE	TRUE	TRUE	FALSE	FALSE	FALSE	TRUE	TRUE
Mnat_03344	g9549.t1	TRUE	TRUE	TRUE	TRUE	TRUE	FALSE	FALSE	FALSE	TRUE	TRUE
Mnat_03345	g9550.t1	TRUE	TRUE	TRUE	TRUE	TRUE	FALSE	FALSE	FALSE	TRUE	TRUE
Mnat_03347	g9554.t1	TRUE	TRUE	TRUE	TRUE	TRUE	TRUE	FALSE	FALSE	TRUE	TRUE
Mnat_03348	g9558.t2;g9558.t1	TRUE	FALSE	FALSE	TRUE	TRUE	TRUE	FALSE	FALSE	TRUE	TRUE
Mnat_03349	g9559.t1	TRUE	TRUE	TRUE	TRUE	FALSE	FALSE	TRUE	FALSE	FALSE	FALSE
Mnat_03350	g9560.t1	TRUE	TRUE	TRUE	TRUE	TRUE	FALSE	FALSE	FALSE	TRUE	TRUE
Mnat_03352	g2317.t1;g2317.t2	TRUE	FALSE	FALSE	FALSE	FALSE	FALSE	TRUE	FALSE	FALSE	FALSE
Mnat_03353	g9561.t1;g9561.t2	TRUE	FALSE	FALSE	TRUE	TRUE	TRUE	FALSE	FALSE	FALSE	TRUE
Mnat_03355	g9564.t1	TRUE	TRUE	TRUE	TRUE	TRUE	FALSE	FALSE	FALSE	FALSE	TRUE
Mnat_03356	g14930.t1	TRUE	TRUE	TRUE	TRUE	FALSE	FALSE	TRUE	FALSE	FALSE	FALSE
Mnat_03358	g14922.t2;g14922.t1	TRUE	FALSE	FALSE	TRUE	TRUE	FALSE	FALSE	FALSE	TRUE	TRUE
Mnat_03361	g14366.t4;g14366.t5	TRUE	FALSE	FALSE	TRUE	FALSE	FALSE	TRUE	FALSE	FALSE	FALSE
Mnat_03363	g14367.t1	TRUE	TRUE	TRUE	TRUE	FALSE	TRUE	TRUE	TRUE	FALSE	FALSE
Mnat_03364	g14368.t1;g14368.t2	TRUE	FALSE	FALSE	TRUE	FALSE	TRUE	TRUE	TRUE	FALSE	FALSE
Mnat_03366	g18015.t1	TRUE	TRUE	TRUE	TRUE	FALSE	FALSE	TRUE	FALSE	FALSE	FALSE
Mnat_03367	g18016.t5;g18016.t2;g18016.t3;g18016.t1;g18016.t4	TRUE	FALSE	FALSE	TRUE	FALSE	FALSE	TRUE	FALSE	FALSE	FALSE
Mnat_03369	g18022.t1	TRUE	TRUE	TRUE	TRUE	FALSE	TRUE	TRUE	TRUE	FALSE	FALSE
Mnat_03371	g18029.t1	TRUE	TRUE	TRUE	TRUE	TRUE	FALSE	FALSE	FALSE	FALSE	TRUE
Mnat_03372	g18030.t1	TRUE	TRUE	TRUE	TRUE	TRUE	FALSE	FALSE	FALSE	TRUE	TRUE
Mnat_03373	g18031.t2	TRUE	TRUE	TRUE	TRUE	TRUE	TRUE	FALSE	FALSE	TRUE	TRUE
Mnat_03374	g18032.t2;g18032.t1	TRUE	FALSE	FALSE	TRUE	TRUE	FALSE	FALSE	FALSE	TRUE	TRUE
Mnat_03379	g18044.t2;g18044.t3;g18044.t1	TRUE	FALSE	FALSE	TRUE	FALSE	FALSE	TRUE	FALSE	FALSE	FALSE
Mnat_03385	g18049.t1;g18049.t3;g18049.t2	TRUE	FALSE	FALSE	TRUE	FALSE	FALSE	TRUE	FALSE	FALSE	FALSE
Mnat_03386	g18050.t3;g18050.t2;g18050.t1	TRUE	FALSE	FALSE	TRUE	TRUE	FALSE	FALSE	FALSE	FALSE	TRUE
Mnat_03390	g18057.t2;g18055.t1;g18057.t1;g18053.t1	TRUE	FALSE	FALSE	TRUE	TRUE	FALSE	FALSE	FALSE	TRUE	TRUE
Mnat_03391	g18059.t1	TRUE	TRUE	TRUE	TRUE	TRUE	FALSE	FALSE	FALSE	TRUE	TRUE
Mnat_03392	g18060.t1	TRUE	TRUE	TRUE	TRUE	TRUE	FALSE	FALSE	FALSE	TRUE	TRUE
Mnat_03393	g18063.t1	TRUE	TRUE	TRUE	TRUE	TRUE	FALSE	TRUE	FALSE	TRUE	TRUE
Mnat_03395	g18065.t1	TRUE	TRUE	TRUE	TRUE	TRUE	FALSE	FALSE	FALSE	TRUE	TRUE
Mnat_03397	g22802.t1	TRUE	TRUE	TRUE	TRUE	TRUE	TRUE	FALSE	FALSE	TRUE	TRUE
Mnat_03399	g22807.t1	TRUE	TRUE	TRUE	TRUE	FALSE	FALSE	TRUE	FALSE	FALSE	FALSE
Mnat_03400	g22808.t2;g22808.t1	TRUE	FALSE	FALSE	TRUE	FALSE	TRUE	TRUE	TRUE	FALSE	FALSE
Mnat_03404	g22813.t1	TRUE	TRUE	TRUE	TRUE	TRUE	TRUE	FALSE	FALSE	TRUE	TRUE
Mnat_03405	g22815.t1	TRUE	TRUE	TRUE	TRUE	TRUE	FALSE	FALSE	FALSE	TRUE	TRUE
Mnat_03406	g22816.t2;g22816.t1;g22816.t3	TRUE	FALSE	FALSE	FALSE	FALSE	FALSE	TRUE	FALSE	FALSE	FALSE
Mnat_03408	g22819.t2;g22819.t3;g22819.t1	TRUE	FALSE	FALSE	TRUE	TRUE	FALSE	FALSE	FALSE	TRUE	TRUE
Mnat_03411	g22820.t1	TRUE	TRUE	TRUE	TRUE	TRUE	TRUE	FALSE	FALSE	TRUE	TRUE
Mnat_03415	g22825.t1	TRUE	TRUE	TRUE	TRUE	FALSE	FALSE	TRUE	FALSE	FALSE	FALSE
Mnat_03422	g21304.t2;g21304.t1	TRUE	FALSE	FALSE	FALSE	FALSE	FALSE	TRUE	FALSE	FALSE	FALSE
Mnat_03427	g2210.t1	TRUE	FALSE	FALSE	FALSE	FALSE	FALSE	TRUE	FALSE	FALSE	FALSE
Mnat_03433	g3368.t1	TRUE	FALSE	FALSE	FALSE	FALSE	FALSE	TRUE	FALSE	FALSE	FALSE
Mnat_03439	g22412.t1	TRUE	FALSE	FALSE	FALSE	FALSE	TRUE	TRUE	TRUE	FALSE	FALSE
Mnat_03440	g17519.t1	TRUE	FALSE	FALSE	FALSE	FALSE	FALSE	TRUE	FALSE	FALSE	FALSE
Mnat_03444	g23430.t1	TRUE	TRUE	TRUE	TRUE	FALSE	FALSE	TRUE	FALSE	FALSE	FALSE
Mnat_03453	g23425.t1	TRUE	TRUE	TRUE	TRUE	TRUE	FALSE	FALSE	FALSE	FALSE	TRUE
Mnat_03457	g3466.t1	TRUE	FALSE	FALSE	FALSE	FALSE	FALSE	TRUE	FALSE	FALSE	FALSE
Mnat_03460	g23421.t1	TRUE	TRUE	TRUE	TRUE	TRUE	FALSE	FALSE	FALSE	TRUE	TRUE
Mnat_03463	g23418.t1	TRUE	FALSE	FALSE	FALSE	FALSE	TRUE	FALSE	TRUE	FALSE	TRUE
Mnat_03464	g23418.t1	TRUE	FALSE	FALSE	FALSE	FALSE	TRUE	TRUE	TRUE	FALSE	FALSE
Mnat_03477	g17519.t1	TRUE	FALSE	FALSE	FALSE	FALSE	FALSE	TRUE	FALSE	FALSE	FALSE
Mnat_03496	g22452.t1;g4119.t1	TRUE	FALSE	FALSE	FALSE	FALSE	FALSE	TRUE	FALSE	FALSE	FALSE
Mnat_03497	g19527.t2	TRUE	TRUE	TRUE	TRUE	TRUE	TRUE	FALSE	TRUE	TRUE	TRUE
Mnat_03498	g19529.t1;g19529.t2	TRUE	FALSE	FALSE	TRUE	FALSE	TRUE	TRUE	TRUE	FALSE	FALSE
Mnat_03501	g19534.t1	TRUE	FALSE	FALSE	FALSE	TRUE	TRUE	FALSE	FALSE	TRUE	TRUE
Mnat_03508	g20491.t1	TRUE	FALSE	FALSE	FALSE	FALSE	FALSE	TRUE	FALSE	FALSE	FALSE
Mnat_03509	g11739.t1	TRUE	TRUE	TRUE	TRUE	FALSE	FALSE	TRUE	FALSE	FALSE	FALSE
Mnat_03511	g11737.t1	TRUE	TRUE	TRUE	TRUE	FALSE	FALSE	TRUE	FALSE	FALSE	FALSE
Mnat_03518	g10587.t1;g10935.t1	TRUE	FALSE	FALSE	TRUE	TRUE	TRUE	FALSE	FALSE	FALSE	TRUE
Mnat_03521	g10590.t1;g10590.t2;g10590.t3	TRUE	FALSE	FALSE	TRUE	FALSE	FALSE	TRUE	FALSE	FALSE	FALSE
Mnat_03522	g10593.t1	TRUE	TRUE	TRUE	TRUE	TRUE	FALSE	FALSE	FALSE	TRUE	TRUE
Mnat_03524	g10596.t1	TRUE	TRUE	TRUE	TRUE	TRUE	FALSE	FALSE	FALSE	FALSE	TRUE
Mnat_03525	g10597.t1	TRUE	TRUE	TRUE	TRUE	TRUE	FALSE	FALSE	FALSE	TRUE	TRUE
Mnat_03526	g10598.t1	TRUE	TRUE	TRUE	TRUE	TRUE	TRUE	FALSE	FALSE	TRUE	TRUE
Mnat_03528	g10600.t2;g10600.t1	TRUE	FALSE	FALSE	TRUE	FALSE	TRUE	FALSE	FALSE	FALSE	TRUE
Mnat_03531	g10606.t1	TRUE	TRUE	TRUE	TRUE	TRUE	FALSE	FALSE	FALSE	TRUE	TRUE
Mnat_03532	g10607.t1	TRUE	TRUE	TRUE	TRUE	TRUE	FALSE	FALSE	FALSE	TRUE	TRUE
Mnat_03535	g10608.t1	TRUE	TRUE	TRUE	TRUE	TRUE	FALSE	FALSE	FALSE	TRUE	TRUE
Mnat_03536	g10613.t1	TRUE	TRUE	TRUE	TRUE	TRUE	TRUE	FALSE	FALSE	FALSE	TRUE
Mnat_03537	g10615.t1	TRUE	TRUE	TRUE	TRUE	TRUE	FALSE	FALSE	FALSE	TRUE	TRUE
Mnat_03538	g10616.t1	TRUE	TRUE	TRUE	TRUE	FALSE	FALSE	TRUE	FALSE	FALSE	FALSE
Mnat_03539	g10617.t1	TRUE	TRUE	TRUE	TRUE	FALSE	FALSE	TRUE	FALSE	FALSE	FALSE
Mnat_03540	g10618.t1	TRUE	TRUE	TRUE	TRUE	FALSE	TRUE	TRUE	TRUE	FALSE	FALSE
Mnat_03541	g10619.t1	TRUE	TRUE	TRUE	TRUE	FALSE	FALSE	TRUE	FALSE	FALSE	FALSE
Mnat_03544	g10623.t2;g10623.t1	TRUE	FALSE	FALSE	TRUE	TRUE	TRUE	FALSE	FALSE	TRUE	TRUE
Mnat_03546	g10626.t1	TRUE	TRUE	TRUE	TRUE	TRUE	FALSE	FALSE	FALSE	FALSE	TRUE
Mnat_03547	g11961.t1;g10627.t1	TRUE	FALSE	FALSE	TRUE	TRUE	TRUE	FALSE	FALSE	TRUE	TRUE
Mnat_03548	g10628.t1	TRUE	TRUE	TRUE	TRUE	TRUE	FALSE	FALSE	FALSE	TRUE	TRUE
Mnat_03549	g10631.t1	TRUE	TRUE	TRUE	TRUE	TRUE	FALSE	FALSE	FALSE	TRUE	TRUE
Mnat_03553	g10632.t1	TRUE	FALSE	TRUE	FALSE	FALSE	FALSE	TRUE	FALSE	FALSE	FALSE
Mnat_03554	g8536.t1	TRUE	FALSE	FALSE	FALSE	FALSE	FALSE	TRUE	FALSE	FALSE	FALSE
Mnat_03555	g10633.t3	TRUE	TRUE	TRUE	TRUE	FALSE	TRUE	TRUE	TRUE	FALSE	FALSE
Mnat_03556	g10638.t1	TRUE	TRUE	TRUE	TRUE	TRUE	FALSE	FALSE	FALSE	TRUE	TRUE
Mnat_03557	g10639.t1	TRUE	TRUE	TRUE	TRUE	TRUE	FALSE	FALSE	FALSE	TRUE	TRUE
Mnat_03559	g10640.t1	TRUE	TRUE	TRUE	TRUE	FALSE	FALSE	TRUE	FALSE	FALSE	FALSE
Mnat_03561	g10641.t1	TRUE	TRUE	TRUE	TRUE	TRUE	FALSE	FALSE	FALSE	FALSE	TRUE
Mnat_03562	g10642.t1	TRUE	TRUE	TRUE	TRUE	TRUE	FALSE	FALSE	FALSE	FALSE	TRUE
Mnat_03563	g10643.t1	TRUE	TRUE	TRUE	TRUE	TRUE	FALSE	FALSE	FALSE	TRUE	TRUE
Mnat_03564	g10644.t1	TRUE	TRUE	TRUE	TRUE	TRUE	TRUE	FALSE	FALSE	TRUE	TRUE
Mnat_03566	g10646.t1	TRUE	TRUE	TRUE	TRUE	FALSE	FALSE	TRUE	FALSE	FALSE	FALSE
Mnat_03575	g1313.t1;g2859.t1	TRUE	FALSE	FALSE	FALSE	FALSE	FALSE	TRUE	FALSE	FALSE	FALSE
Mnat_03593	g19052.t2;g19052.t1	TRUE	FALSE	FALSE	TRUE	FALSE	TRUE	TRUE	TRUE	FALSE	FALSE
Mnat_03594	g23216.t1	TRUE	FALSE	TRUE	FALSE	FALSE	TRUE	TRUE	TRUE	FALSE	FALSE
Mnat_03595	g19055.t1	TRUE	TRUE	TRUE	TRUE	TRUE	TRUE	FALSE	FALSE	FALSE	TRUE
Mnat_03596	g19056.t1	TRUE	TRUE	TRUE	TRUE	TRUE	TRUE	FALSE	FALSE	TRUE	TRUE
Mnat_03599	g1169.t2;g1169.t1	TRUE	FALSE	FALSE	TRUE	TRUE	FALSE	FALSE	FALSE	TRUE	TRUE
Mnat_03601	g1168.t2;g1168.t1	TRUE	FALSE	FALSE	TRUE	FALSE	FALSE	TRUE	FALSE	FALSE	FALSE
Mnat_03607	g1163.t1	TRUE	TRUE	TRUE	TRUE	TRUE	FALSE	FALSE	FALSE	TRUE	TRUE
Mnat_03609	g1162.t1;g1162.t2	TRUE	FALSE	FALSE	TRUE	TRUE	FALSE	FALSE	FALSE	TRUE	TRUE
Mnat_03612	g1159.t1	TRUE	TRUE	TRUE	TRUE	TRUE	FALSE	FALSE	FALSE	TRUE	TRUE
Mnat_03615	g1155.t1	TRUE	TRUE	TRUE	TRUE	TRUE	FALSE	FALSE	FALSE	FALSE	TRUE
Mnat_03620	g16517.t1	TRUE	FALSE	FALSE	FALSE	FALSE	FALSE	TRUE	FALSE	FALSE	FALSE
Mnat_03622	g2274.t1	TRUE	TRUE	TRUE	TRUE	FALSE	TRUE	TRUE	TRUE	FALSE	FALSE
Mnat_03623	g2278.t2;g2278.t1	TRUE	FALSE	FALSE	TRUE	TRUE	TRUE	FALSE	FALSE	TRUE	TRUE
Mnat_03626	g2281.t1	TRUE	TRUE	TRUE	TRUE	TRUE	FALSE	FALSE	FALSE	TRUE	TRUE
Mnat_03629	g2285.t1;g2285.t2	TRUE	FALSE	FALSE	TRUE	FALSE	FALSE	TRUE	FALSE	FALSE	FALSE
Mnat_03630	g2286.t1	TRUE	TRUE	TRUE	TRUE	TRUE	TRUE	FALSE	FALSE	TRUE	TRUE
Mnat_03631	g2290.t1	TRUE	TRUE	TRUE	TRUE	FALSE	TRUE	TRUE	TRUE	FALSE	FALSE
Mnat_03637	g2295.t1	TRUE	TRUE	TRUE	TRUE	TRUE	FALSE	FALSE	FALSE	TRUE	TRUE
Mnat_03638	g2296.t1	TRUE	TRUE	TRUE	TRUE	TRUE	FALSE	TRUE	FALSE	TRUE	TRUE
Mnat_03643	g2301.t1;g2301.t2;g2301.t3	TRUE	FALSE	FALSE	TRUE	TRUE	FALSE	FALSE	FALSE	FALSE	TRUE
Mnat_03645	g2302.t1	TRUE	TRUE	TRUE	TRUE	TRUE	FALSE	FALSE	FALSE	TRUE	TRUE
Mnat_03647	g2304.t1	TRUE	TRUE	TRUE	TRUE	TRUE	FALSE	TRUE	FALSE	TRUE	TRUE
Mnat_03648	g2305.t1	TRUE	TRUE	TRUE	TRUE	TRUE	TRUE	FALSE	FALSE	FALSE	TRUE
Mnat_03649	g2306.t1	TRUE	TRUE	TRUE	TRUE	TRUE	TRUE	FALSE	FALSE	FALSE	TRUE
Mnat_03652	g2308.t1	TRUE	TRUE	TRUE	TRUE	TRUE	TRUE	FALSE	FALSE	TRUE	TRUE
Mnat_03653	g2310.t1	TRUE	TRUE	TRUE	TRUE	TRUE	FALSE	FALSE	FALSE	FALSE	TRUE
Mnat_03654	g2311.t1	TRUE	TRUE	TRUE	TRUE	TRUE	TRUE	FALSE	FALSE	FALSE	TRUE
Mnat_03655	g2313.t1	TRUE	TRUE	TRUE	TRUE	FALSE	TRUE	TRUE	TRUE	FALSE	FALSE
Mnat_03657	g2314.t2	TRUE	TRUE	TRUE	TRUE	FALSE	FALSE	TRUE	FALSE	FALSE	FALSE
Mnat_03661	g2319.t1	TRUE	FALSE	FALSE	FALSE	FALSE	TRUE	TRUE	TRUE	FALSE	FALSE
Mnat_03662	g2319.t1	TRUE	FALSE	TRUE	FALSE	FALSE	FALSE	TRUE	FALSE	FALSE	FALSE
Mnat_03663	g2320.t1	TRUE	TRUE	TRUE	TRUE	TRUE	FALSE	TRUE	FALSE	FALSE	TRUE
Mnat_03665	g2322.t1	TRUE	TRUE	TRUE	TRUE	FALSE	FALSE	TRUE	FALSE	FALSE	FALSE
Mnat_03667	g2323.t2;g2323.t1	TRUE	FALSE	FALSE	TRUE	FALSE	FALSE	TRUE	FALSE	FALSE	FALSE
Mnat_03669	g2325.t1	TRUE	TRUE	TRUE	TRUE	FALSE	TRUE	FALSE	TRUE	FALSE	TRUE
Mnat_03672	g2327.t1	TRUE	TRUE	TRUE	TRUE	TRUE	FALSE	FALSE	FALSE	FALSE	TRUE
Mnat_03675	g2330.t2;g2330.t1	TRUE	FALSE	FALSE	TRUE	FALSE	TRUE	TRUE	TRUE	FALSE	FALSE
Mnat_03676	g2331.t1	TRUE	TRUE	TRUE	TRUE	FALSE	TRUE	TRUE	TRUE	FALSE	FALSE
Mnat_03677	g2333.t2;g2333.t1	TRUE	FALSE	FALSE	TRUE	FALSE	FALSE	TRUE	FALSE	FALSE	FALSE
Mnat_03678	g2336.t2;g2336.t1	TRUE	FALSE	FALSE	TRUE	TRUE	FALSE	FALSE	FALSE	FALSE	TRUE
Mnat_03679	g2337.t1	TRUE	TRUE	TRUE	TRUE	FALSE	FALSE	TRUE	FALSE	FALSE	FALSE
Mnat_03680	g2338.t2;g2338.t1	TRUE	FALSE	FALSE	TRUE	TRUE	FALSE	FALSE	FALSE	TRUE	FALSE
Mnat_03681	g2339.t2;g2339.t1	TRUE	FALSE	FALSE	TRUE	TRUE	TRUE	FALSE	FALSE	TRUE	TRUE
Mnat_03682	g2340.t1	TRUE	TRUE	TRUE	TRUE	TRUE	FALSE	FALSE	FALSE	FALSE	TRUE
Mnat_03683	g2341.t1	TRUE	TRUE	TRUE	TRUE	TRUE	TRUE	FALSE	FALSE	FALSE	TRUE
Mnat_03686	g6554.t1	TRUE	TRUE	TRUE	TRUE	TRUE	FALSE	FALSE	FALSE	FALSE	TRUE
Mnat_03691	g15166.t1	TRUE	FALSE	FALSE	FALSE	FALSE	FALSE	TRUE	FALSE	FALSE	FALSE
Mnat_03695	g6499.t2;g6499.t1;g10147.t1;g8307.t1	TRUE	FALSE	FALSE	TRUE	FALSE	FALSE	TRUE	FALSE	FALSE	FALSE
Mnat_03701	g6503.t1;g6503.t3;g6503.t2	TRUE	FALSE	FALSE	TRUE	FALSE	FALSE	TRUE	FALSE	FALSE	FALSE
Mnat_03703	g6509.t2;g6509.t1;g6508.t1;g2370.t3;g2370.t1;g2370.t2	TRUE	FALSE	FALSE	TRUE	TRUE	TRUE	FALSE	FALSE	TRUE	TRUE
Mnat_03705	g6510.t1	TRUE	TRUE	TRUE	TRUE	TRUE	FALSE	FALSE	FALSE	TRUE	TRUE
Mnat_03712	g6512.t1	TRUE	TRUE	TRUE	TRUE	TRUE	FALSE	FALSE	FALSE	TRUE	TRUE
Mnat_03725	g9505.t1	TRUE	TRUE	TRUE	TRUE	FALSE	FALSE	TRUE	FALSE	FALSE	FALSE
Mnat_03726	g9506.t1;g9506.t2;g9506.t3	TRUE	FALSE	FALSE	TRUE	TRUE	FALSE	TRUE	FALSE	TRUE	TRUE
Mnat_03728	g9507.t1	TRUE	TRUE	TRUE	TRUE	TRUE	FALSE	FALSE	FALSE	TRUE	TRUE
Mnat_03731	g2210.t1	TRUE	FALSE	FALSE	FALSE	FALSE	FALSE	TRUE	FALSE	FALSE	FALSE
Mnat_03733	g2210.t1	TRUE	FALSE	FALSE	FALSE	FALSE	FALSE	TRUE	FALSE	FALSE	FALSE
Mnat_03734	g9518.t2;g9518.t1	TRUE	FALSE	FALSE	TRUE	FALSE	TRUE	FALSE	FALSE	FALSE	TRUE
Mnat_03736	g14246.t1	TRUE	FALSE	FALSE	FALSE	FALSE	FALSE	TRUE	FALSE	FALSE	FALSE
Mnat_03742	g2210.t1	TRUE	FALSE	FALSE	FALSE	FALSE	TRUE	TRUE	TRUE	FALSE	FALSE
Mnat_03746	g7767.t1	TRUE	TRUE	TRUE	TRUE	TRUE	FALSE	FALSE	FALSE	TRUE	TRUE
Mnat_03747	g7769.t1	TRUE	TRUE	TRUE	TRUE	FALSE	FALSE	TRUE	FALSE	FALSE	FALSE
Mnat_03748	g3847.t1	TRUE	FALSE	FALSE	FALSE	TRUE	FALSE	FALSE	FALSE	FALSE	TRUE
Mnat_03750	g15778.t2	TRUE	TRUE	TRUE	TRUE	TRUE	FALSE	TRUE	FALSE	TRUE	TRUE
Mnat_03751	g15777.t2	TRUE	TRUE	TRUE	TRUE	FALSE	FALSE	TRUE	FALSE	FALSE	FALSE
Mnat_03753	g15774.t1	TRUE	TRUE	TRUE	TRUE	TRUE	FALSE	FALSE	FALSE	FALSE	TRUE
Mnat_03754	g15773.t1	TRUE	TRUE	TRUE	TRUE	TRUE	FALSE	FALSE	FALSE	TRUE	TRUE
Mnat_03758	g22452.t1;g4119.t1	TRUE	FALSE	FALSE	FALSE	FALSE	TRUE	TRUE	TRUE	FALSE	FALSE
Mnat_03760	g15771.t1;g15769.t1	TRUE	FALSE	FALSE	TRUE	FALSE	FALSE	TRUE	FALSE	FALSE	FALSE
Mnat_03771	g15755.t1	TRUE	TRUE	TRUE	TRUE	TRUE	TRUE	FALSE	FALSE	TRUE	TRUE
Mnat_03772	g15753.t1	TRUE	TRUE	TRUE	TRUE	FALSE	FALSE	TRUE	FALSE	FALSE	FALSE
Mnat_03773	g15752.t2;g15752.t3;g15752.t1	TRUE	FALSE	FALSE	TRUE	TRUE	TRUE	FALSE	FALSE	TRUE	TRUE
Mnat_03774	g15750.t2	TRUE	TRUE	TRUE	TRUE	TRUE	TRUE	FALSE	FALSE	TRUE	TRUE
Mnat_03776	g15749.t1	TRUE	TRUE	TRUE	TRUE	FALSE	FALSE	TRUE	FALSE	FALSE	FALSE
Mnat_03777	g15748.t2;g15748.t1	TRUE	FALSE	FALSE	TRUE	FALSE	FALSE	TRUE	FALSE	FALSE	FALSE
Mnat_03781	g15744.t1	TRUE	TRUE	TRUE	TRUE	TRUE	FALSE	FALSE	FALSE	TRUE	TRUE
Mnat_03783	g15742.t2;g15742.t1;g15742.t3	TRUE	FALSE	FALSE	TRUE	FALSE	FALSE	TRUE	FALSE	FALSE	FALSE
Mnat_03784	g16517.t1	TRUE	FALSE	FALSE	FALSE	FALSE	FALSE	TRUE	FALSE	FALSE	FALSE
Mnat_03787	g15741.t2;g15741.t3;g15741.t1	TRUE	FALSE	FALSE	TRUE	TRUE	FALSE	FALSE	FALSE	TRUE	TRUE
Mnat_03789	g15738.t4;g15738.t1;g15738.t2;g15738.t3	TRUE	FALSE	FALSE	TRUE	TRUE	TRUE	FALSE	FALSE	FALSE	TRUE
Mnat_03791	g15738.t5	TRUE	TRUE	TRUE	TRUE	TRUE	TRUE	FALSE	FALSE	TRUE	TRUE
Mnat_03792	g15737.t1	TRUE	FALSE	FALSE	FALSE	TRUE	FALSE	FALSE	FALSE	TRUE	TRUE
Mnat_03794	g15735.t1	TRUE	TRUE	TRUE	TRUE	TRUE	FALSE	FALSE	FALSE	FALSE	TRUE
Mnat_03798	g15734.t2	TRUE	TRUE	TRUE	TRUE	FALSE	FALSE	TRUE	FALSE	FALSE	FALSE
Mnat_03801	g15733.t1	TRUE	TRUE	TRUE	TRUE	TRUE	FALSE	FALSE	FALSE	TRUE	TRUE
Mnat_03802	g6582.t1	TRUE	FALSE	FALSE	FALSE	TRUE	TRUE	FALSE	FALSE	TRUE	TRUE
Mnat_03804	g15732.t1	TRUE	TRUE	TRUE	TRUE	TRUE	FALSE	FALSE	FALSE	FALSE	TRUE
Mnat_03812	g15723.t1	TRUE	TRUE	TRUE	TRUE	TRUE	FALSE	FALSE	FALSE	TRUE	TRUE
Mnat_03815	g15720.t1	TRUE	TRUE	TRUE	TRUE	TRUE	FALSE	FALSE	FALSE	FALSE	TRUE
Mnat_03818	g15717.t1	TRUE	TRUE	TRUE	TRUE	TRUE	FALSE	FALSE	FALSE	TRUE	TRUE
Mnat_03826	g15712.t1	TRUE	TRUE	TRUE	TRUE	FALSE	FALSE	TRUE	FALSE	FALSE	FALSE
Mnat_03827	g15711.t2;g15711.t1	TRUE	FALSE	FALSE	TRUE	TRUE	FALSE	FALSE	FALSE	FALSE	TRUE
Mnat_03828	g15709.t1	TRUE	TRUE	TRUE	TRUE	TRUE	FALSE	FALSE	FALSE	FALSE	TRUE
Mnat_03830	g15706.t1	TRUE	TRUE	TRUE	TRUE	FALSE	FALSE	TRUE	FALSE	FALSE	FALSE
Mnat_03831	g15705.t1	TRUE	TRUE	TRUE	TRUE	TRUE	FALSE	FALSE	FALSE	FALSE	TRUE
Mnat_03832	g15704.t1	TRUE	TRUE	TRUE	TRUE	FALSE	FALSE	TRUE	FALSE	FALSE	FALSE
Mnat_03835	g15702.t3;g15702.t1;g15702.t2	TRUE	FALSE	FALSE	TRUE	FALSE	FALSE	TRUE	FALSE	FALSE	FALSE
Mnat_03838	g15700.t1	TRUE	TRUE	TRUE	TRUE	TRUE	FALSE	FALSE	FALSE	TRUE	TRUE
Mnat_03839	g15696.t1	TRUE	TRUE	TRUE	TRUE	FALSE	TRUE	TRUE	TRUE	FALSE	FALSE
Mnat_03840	g15695.t1	TRUE	TRUE	TRUE	TRUE	FALSE	FALSE	TRUE	FALSE	FALSE	FALSE
Mnat_03844	g15689.t1	TRUE	TRUE	TRUE	TRUE	FALSE	FALSE	TRUE	FALSE	FALSE	FALSE
Mnat_03847	g2210.t1	TRUE	FALSE	FALSE	FALSE	FALSE	FALSE	TRUE	FALSE	FALSE	FALSE
Mnat_03849	g7477.t1	TRUE	FALSE	FALSE	FALSE	FALSE	TRUE	TRUE	TRUE	FALSE	FALSE
Mnat_03856	g22452.t1;g4119.t1	TRUE	FALSE	FALSE	FALSE	FALSE	TRUE	FALSE	TRUE	FALSE	TRUE
Mnat_03857	g3993.t1	TRUE	FALSE	FALSE	FALSE	FALSE	TRUE	TRUE	TRUE	FALSE	FALSE
Mnat_03858	g3993.t1	TRUE	FALSE	TRUE	FALSE	FALSE	TRUE	TRUE	TRUE	FALSE	FALSE
Mnat_03866	g18784.t1	TRUE	FALSE	FALSE	FALSE	FALSE	FALSE	TRUE	FALSE	FALSE	FALSE
Mnat_03868	g3995.t1	TRUE	TRUE	TRUE	TRUE	FALSE	FALSE	TRUE	FALSE	FALSE	FALSE
Mnat_03869	g3996.t1	TRUE	TRUE	TRUE	TRUE	FALSE	TRUE	TRUE	TRUE	FALSE	FALSE
Mnat_03872	g4000.t1	TRUE	TRUE	TRUE	TRUE	FALSE	FALSE	TRUE	FALSE	FALSE	FALSE
Mnat_03875	g16517.t1	TRUE	FALSE	FALSE	FALSE	TRUE	FALSE	FALSE	FALSE	TRUE	TRUE
Mnat_03876	g2210.t1	TRUE	FALSE	FALSE	FALSE	FALSE	TRUE	TRUE	TRUE	FALSE	FALSE
Mnat_03880	g4004.t1	TRUE	TRUE	TRUE	TRUE	FALSE	TRUE	TRUE	TRUE	FALSE	FALSE
Mnat_03884	g12772.t1;g4007.t1	TRUE	FALSE	FALSE	TRUE	FALSE	FALSE	TRUE	FALSE	FALSE	FALSE
Mnat_03885	g4008.t1;g4008.t4;g4008.t3;g4008.t2	TRUE	FALSE	FALSE	TRUE	FALSE	FALSE	TRUE	FALSE	FALSE	FALSE
Mnat_03888	g12126.t1	TRUE	FALSE	FALSE	FALSE	FALSE	FALSE	TRUE	FALSE	FALSE	FALSE
Mnat_03890	g7078.t1	TRUE	FALSE	FALSE	FALSE	FALSE	FALSE	TRUE	FALSE	FALSE	FALSE
Mnat_03891	g16517.t1	TRUE	FALSE	FALSE	FALSE	FALSE	TRUE	TRUE	TRUE	FALSE	FALSE
Mnat_03892	g4012.t4;g4012.t1;g4012.t2;g4012.t3	TRUE	FALSE	FALSE	TRUE	FALSE	FALSE	TRUE	FALSE	FALSE	FALSE
Mnat_03894	g4014.t1	TRUE	TRUE	TRUE	TRUE	TRUE	FALSE	FALSE	FALSE	TRUE	TRUE
Mnat_03896	g4016.t1	TRUE	TRUE	TRUE	TRUE	TRUE	FALSE	FALSE	FALSE	FALSE	TRUE
Mnat_03899	g4019.t1;g4019.t2;g4019.t3	TRUE	FALSE	FALSE	TRUE	TRUE	FALSE	FALSE	FALSE	FALSE	TRUE
Mnat_03900	g13712.t1	TRUE	FALSE	FALSE	FALSE	FALSE	FALSE	TRUE	FALSE	FALSE	FALSE
Mnat_03903	g4023.t2;g4023.t1	TRUE	FALSE	FALSE	TRUE	TRUE	FALSE	FALSE	FALSE	TRUE	TRUE
Mnat_03904	g4024.t3;g4024.t1;g4024.t2	TRUE	FALSE	FALSE	TRUE	TRUE	FALSE	FALSE	FALSE	FALSE	TRUE
Mnat_03907	g4026.t1	TRUE	TRUE	TRUE	TRUE	TRUE	TRUE	FALSE	FALSE	TRUE	TRUE
Mnat_03908	g4031.t1;g4031.t2	TRUE	FALSE	FALSE	FALSE	TRUE	FALSE	TRUE	FALSE	TRUE	TRUE
Mnat_03909	g4028.t1;g4028.t2	TRUE	FALSE	FALSE	TRUE	FALSE	TRUE	TRUE	TRUE	FALSE	FALSE
Mnat_03910	g4029.t1	TRUE	TRUE	TRUE	TRUE	TRUE	FALSE	FALSE	FALSE	FALSE	TRUE
Mnat_03911	g4030.t1;g4027.t1	TRUE	FALSE	FALSE	TRUE	TRUE	TRUE	FALSE	FALSE	TRUE	TRUE
Mnat_03912	g4031.t1;g4031.t2	TRUE	FALSE	FALSE	FALSE	FALSE	TRUE	TRUE	TRUE	FALSE	FALSE
Mnat_03913	g4032.t1	TRUE	TRUE	TRUE	TRUE	TRUE	FALSE	FALSE	FALSE	FALSE	TRUE
Mnat_03915	g4034.t1	TRUE	TRUE	TRUE	TRUE	TRUE	FALSE	FALSE	FALSE	FALSE	TRUE
Mnat_03917	g4036.t1	TRUE	TRUE	TRUE	TRUE	TRUE	FALSE	FALSE	FALSE	TRUE	FALSE
Mnat_03921	g4040.t1	TRUE	TRUE	TRUE	TRUE	TRUE	FALSE	FALSE	FALSE	TRUE	TRUE
Mnat_03923	g17519.t1	TRUE	FALSE	FALSE	FALSE	FALSE	FALSE	TRUE	FALSE	FALSE	FALSE
Mnat_03926	g2210.t1	TRUE	FALSE	FALSE	FALSE	FALSE	FALSE	TRUE	FALSE	FALSE	FALSE
Mnat_03930	g4051.t1;g4051.t2;g4051.t3	TRUE	FALSE	FALSE	TRUE	TRUE	TRUE	FALSE	FALSE	FALSE	TRUE
Mnat_03938	g4055.t7;g4055.t8;g4055.t2;g4055.t1;g4055.t6;g4055.t4;g4055.t5;g4055.t10;g4055.t3;g4055.t9;g4055.t11	TRUE	FALSE	FALSE	TRUE	FALSE	FALSE	TRUE	FALSE	FALSE	FALSE
Mnat_03944	g10824.t1	TRUE	TRUE	TRUE	TRUE	FALSE	FALSE	TRUE	FALSE	FALSE	FALSE
Mnat_03946	g10830.t1	TRUE	TRUE	TRUE	TRUE	FALSE	FALSE	TRUE	FALSE	FALSE	FALSE
Mnat_03947	g10835.t1	TRUE	TRUE	TRUE	TRUE	FALSE	TRUE	TRUE	TRUE	FALSE	FALSE
Mnat_03948	g10836.t1	TRUE	TRUE	TRUE	TRUE	FALSE	FALSE	TRUE	FALSE	FALSE	FALSE
Mnat_03949	g10838.t1	TRUE	TRUE	TRUE	TRUE	FALSE	TRUE	TRUE	TRUE	FALSE	FALSE
Mnat_03950	g10839.t1	TRUE	TRUE	TRUE	TRUE	FALSE	FALSE	TRUE	FALSE	FALSE	FALSE
Mnat_03951	g10841.t1	TRUE	TRUE	TRUE	TRUE	TRUE	FALSE	FALSE	FALSE	TRUE	TRUE
Mnat_03952	g10842.t1	TRUE	TRUE	TRUE	TRUE	TRUE	FALSE	FALSE	FALSE	FALSE	TRUE
Mnat_03954	g10845.t1	TRUE	TRUE	TRUE	TRUE	TRUE	FALSE	FALSE	FALSE	TRUE	TRUE
Mnat_03955	g10848.t3;g10848.t1;g17157.t1;g10848.t2	TRUE	FALSE	FALSE	TRUE	FALSE	FALSE	TRUE	FALSE	FALSE	FALSE
Mnat_03956	g2210.t1	TRUE	FALSE	FALSE	FALSE	FALSE	FALSE	TRUE	FALSE	FALSE	FALSE
Mnat_03957	g19712.t1	TRUE	TRUE	TRUE	TRUE	FALSE	FALSE	TRUE	FALSE	FALSE	FALSE
Mnat_03958	g19713.t1	TRUE	TRUE	TRUE	TRUE	TRUE	FALSE	FALSE	FALSE	TRUE	TRUE
Mnat_03960	g13649.t1	TRUE	FALSE	FALSE	FALSE	FALSE	FALSE	TRUE	FALSE	FALSE	FALSE
Mnat_03961	g19714.t1;g3938.t1;g14073.t1;g14072.t1;g11410.t1	TRUE	FALSE	FALSE	TRUE	FALSE	TRUE	TRUE	TRUE	FALSE	FALSE
Mnat_03962	g19716.t1	TRUE	FALSE	FALSE	FALSE	FALSE	TRUE	FALSE	FALSE	FALSE	TRUE
Mnat_03966	g19717.t1;g19717.t2	TRUE	FALSE	FALSE	TRUE	TRUE	FALSE	FALSE	FALSE	TRUE	TRUE
Mnat_03968	g19719.t1	TRUE	TRUE	TRUE	TRUE	TRUE	FALSE	FALSE	FALSE	FALSE	TRUE
Mnat_03969	g19721.t1	TRUE	TRUE	TRUE	TRUE	TRUE	FALSE	TRUE	FALSE	TRUE	FALSE
Mnat_03970	g19722.t1	TRUE	TRUE	TRUE	TRUE	FALSE	FALSE	TRUE	FALSE	FALSE	FALSE
Mnat_03971	g19723.t1	TRUE	TRUE	TRUE	TRUE	FALSE	TRUE	TRUE	TRUE	FALSE	FALSE
Mnat_03972	g19726.t2;g19726.t1	TRUE	FALSE	FALSE	TRUE	FALSE	FALSE	TRUE	FALSE	FALSE	FALSE
Mnat_03995	g22452.t1;g4119.t1	TRUE	FALSE	FALSE	FALSE	FALSE	TRUE	TRUE	TRUE	FALSE	FALSE
Mnat_03998	g19743.t1	TRUE	TRUE	TRUE	TRUE	FALSE	FALSE	TRUE	FALSE	FALSE	FALSE
Mnat_04000	g19745.t4;g19745.t3;g19745.t1;g19745.t2	TRUE	FALSE	FALSE	TRUE	FALSE	FALSE	TRUE	FALSE	FALSE	FALSE
Mnat_04003	g19749.t1	TRUE	TRUE	TRUE	TRUE	TRUE	TRUE	FALSE	FALSE	TRUE	TRUE
Mnat_04008	g19753.t1	TRUE	TRUE	TRUE	TRUE	TRUE	FALSE	FALSE	FALSE	TRUE	TRUE
Mnat_04013	g3368.t1	TRUE	FALSE	FALSE	FALSE	FALSE	FALSE	TRUE	FALSE	FALSE	FALSE
Mnat_04014	g19755.t2;g19755.t1	TRUE	FALSE	FALSE	TRUE	FALSE	FALSE	TRUE	FALSE	FALSE	FALSE
Mnat_04016	g2210.t1	TRUE	FALSE	FALSE	FALSE	FALSE	FALSE	TRUE	FALSE	FALSE	FALSE
Mnat_04018	g10256.t1	TRUE	FALSE	FALSE	FALSE	FALSE	TRUE	TRUE	TRUE	FALSE	FALSE
Mnat_04022	g22452.t1;g4119.t1	TRUE	FALSE	FALSE	FALSE	FALSE	FALSE	TRUE	FALSE	FALSE	FALSE
Mnat_04024	g19758.t1;g19758.t2;g19758.t3	TRUE	FALSE	FALSE	TRUE	FALSE	FALSE	TRUE	FALSE	FALSE	FALSE
Mnat_04026	g19760.t1	TRUE	TRUE	TRUE	TRUE	TRUE	FALSE	TRUE	FALSE	TRUE	FALSE
Mnat_04036	g1244.t1	TRUE	FALSE	FALSE	FALSE	TRUE	FALSE	FALSE	FALSE	TRUE	TRUE
Mnat_04040	g19765.t1	TRUE	TRUE	TRUE	TRUE	TRUE	TRUE	FALSE	FALSE	TRUE	TRUE
Mnat_04048	g19767.t3;g19767.t1;g19767.t2	TRUE	FALSE	FALSE	TRUE	TRUE	FALSE	FALSE	FALSE	FALSE	TRUE
Mnat_04049	g19769.t1	TRUE	TRUE	TRUE	TRUE	FALSE	FALSE	TRUE	FALSE	FALSE	FALSE
Mnat_04050	g19770.t2;g19770.t3;g19770.t1	TRUE	FALSE	FALSE	TRUE	TRUE	FALSE	FALSE	FALSE	TRUE	TRUE
Mnat_04053	g19776.t2;g19776.t1	TRUE	FALSE	FALSE	TRUE	FALSE	TRUE	FALSE	FALSE	FALSE	TRUE
Mnat_04054	g7477.t1	TRUE	FALSE	FALSE	FALSE	FALSE	FALSE	TRUE	FALSE	FALSE	FALSE
Mnat_04056	g19778.t2;g19778.t1	TRUE	FALSE	FALSE	TRUE	FALSE	FALSE	TRUE	FALSE	FALSE	FALSE
Mnat_04057	g16110.t1	TRUE	FALSE	FALSE	FALSE	FALSE	FALSE	TRUE	FALSE	FALSE	FALSE
Mnat_04068	g19779.t1	TRUE	TRUE	TRUE	TRUE	TRUE	TRUE	FALSE	FALSE	TRUE	TRUE
Mnat_04071	g19782.t2;g19782.t1;g19782.t3	TRUE	FALSE	FALSE	TRUE	TRUE	FALSE	FALSE	FALSE	TRUE	TRUE
Mnat_04078	g7477.t1	TRUE	FALSE	FALSE	FALSE	FALSE	TRUE	TRUE	TRUE	FALSE	FALSE
Mnat_04079	g19783.t1	TRUE	TRUE	TRUE	TRUE	TRUE	FALSE	FALSE	FALSE	TRUE	TRUE
Mnat_04083	g19786.t1	TRUE	TRUE	TRUE	TRUE	TRUE	FALSE	FALSE	FALSE	TRUE	TRUE
Mnat_04086	g19789.t1	TRUE	TRUE	TRUE	TRUE	FALSE	FALSE	TRUE	FALSE	FALSE	FALSE
Mnat_04087	g5051.t1	TRUE	TRUE	TRUE	TRUE	FALSE	TRUE	FALSE	FALSE	FALSE	TRUE
Mnat_04090	g5046.t1	TRUE	TRUE	TRUE	TRUE	TRUE	FALSE	FALSE	FALSE	FALSE	TRUE
Mnat_04093	g5043.t1	TRUE	TRUE	TRUE	TRUE	TRUE	FALSE	FALSE	FALSE	TRUE	TRUE
Mnat_04094	g5041.t1	TRUE	TRUE	TRUE	TRUE	FALSE	TRUE	TRUE	TRUE	FALSE	FALSE
Mnat_04095	g5038.t1	TRUE	TRUE	TRUE	TRUE	FALSE	TRUE	TRUE	TRUE	FALSE	FALSE
Mnat_04101	g12126.t1	TRUE	FALSE	FALSE	FALSE	FALSE	FALSE	TRUE	FALSE	FALSE	FALSE
Mnat_04103	g5029.t1	TRUE	TRUE	TRUE	TRUE	TRUE	TRUE	FALSE	FALSE	FALSE	TRUE
Mnat_04107	g5025.t2;g5025.t1	TRUE	FALSE	FALSE	TRUE	TRUE	FALSE	TRUE	FALSE	TRUE	FALSE
Mnat_04108	g5024.t1	TRUE	TRUE	TRUE	TRUE	TRUE	FALSE	TRUE	FALSE	TRUE	TRUE
Mnat_04109	g5022.t2;g5022.t1	TRUE	FALSE	FALSE	TRUE	TRUE	FALSE	FALSE	FALSE	FALSE	TRUE
Mnat_04120	g21139.t1	TRUE	TRUE	TRUE	TRUE	TRUE	FALSE	FALSE	FALSE	TRUE	TRUE
Mnat_04122	g21133.t1	TRUE	TRUE	TRUE	TRUE	FALSE	FALSE	TRUE	FALSE	FALSE	FALSE
Mnat_04124	g21131.t1	TRUE	TRUE	TRUE	TRUE	FALSE	FALSE	TRUE	FALSE	FALSE	FALSE
Mnat_04125	g21129.t1	TRUE	TRUE	TRUE	TRUE	TRUE	FALSE	FALSE	FALSE	TRUE	TRUE
Mnat_04128	g21123.t1	TRUE	TRUE	TRUE	TRUE	TRUE	FALSE	FALSE	FALSE	FALSE	TRUE
Mnat_04130	g21119.t1	TRUE	TRUE	TRUE	TRUE	TRUE	FALSE	FALSE	FALSE	FALSE	TRUE
Mnat_04131	g21117.t2;g21117.t1	TRUE	FALSE	FALSE	TRUE	FALSE	FALSE	TRUE	FALSE	FALSE	FALSE
Mnat_04132	g21116.t1	TRUE	TRUE	TRUE	TRUE	TRUE	FALSE	FALSE	FALSE	FALSE	TRUE
Mnat_04133	g21113.t1	TRUE	TRUE	TRUE	TRUE	FALSE	FALSE	TRUE	FALSE	FALSE	FALSE
Mnat_04137	g21110.t1	TRUE	TRUE	TRUE	TRUE	TRUE	FALSE	FALSE	FALSE	TRUE	FALSE
Mnat_04141	g7591.t2	TRUE	TRUE	TRUE	TRUE	TRUE	FALSE	FALSE	FALSE	FALSE	TRUE
Mnat_04144	g7589.t1	TRUE	TRUE	TRUE	TRUE	FALSE	FALSE	TRUE	FALSE	FALSE	FALSE
Mnat_04146	g7584.t1	TRUE	TRUE	TRUE	TRUE	FALSE	TRUE	TRUE	TRUE	FALSE	FALSE
Mnat_04147	g7582.t1	TRUE	TRUE	TRUE	TRUE	FALSE	FALSE	FALSE	FALSE	FALSE	FALSE
Mnat_04150	g7575.t2;g7575.t1	TRUE	FALSE	FALSE	TRUE	FALSE	TRUE	TRUE	TRUE	FALSE	TRUE
Mnat_04151	g7574.t1;g7574.t2;g7574.t3	TRUE	FALSE	FALSE	TRUE	FALSE	TRUE	TRUE	TRUE	FALSE	FALSE
Mnat_04155	g22452.t1;g4119.t1	TRUE	FALSE	FALSE	FALSE	FALSE	FALSE	TRUE	FALSE	FALSE	FALSE
Mnat_04156	g7564.t2;g7564.t1;g7564.t3;g7564.t4	TRUE	FALSE	FALSE	TRUE	FALSE	FALSE	TRUE	FALSE	FALSE	FALSE
Mnat_04158	g7563.t1	TRUE	TRUE	TRUE	TRUE	FALSE	TRUE	TRUE	TRUE	FALSE	FALSE
Mnat_04163	g7561.t1	TRUE	TRUE	TRUE	TRUE	TRUE	FALSE	FALSE	FALSE	TRUE	TRUE
Mnat_04164	g2210.t1	TRUE	FALSE	FALSE	FALSE	FALSE	FALSE	TRUE	FALSE	FALSE	FALSE
Mnat_04167	g7555.t1	TRUE	TRUE	TRUE	TRUE	FALSE	FALSE	TRUE	FALSE	FALSE	FALSE
Mnat_04168	g13029.t1;g7551.t2;g7551.t1;g7551.t3	TRUE	FALSE	FALSE	TRUE	FALSE	FALSE	TRUE	FALSE	FALSE	FALSE
Mnat_04169	g7550.t3;g7550.t1;g7550.t2	TRUE	FALSE	FALSE	TRUE	FALSE	FALSE	TRUE	FALSE	FALSE	FALSE
Mnat_04170	g7549.t1	TRUE	TRUE	TRUE	TRUE	TRUE	FALSE	FALSE	FALSE	TRUE	TRUE
Mnat_04171	g7546.t1;g7546.t2	TRUE	FALSE	FALSE	TRUE	TRUE	FALSE	FALSE	FALSE	TRUE	TRUE
Mnat_04172	g7545.t2	TRUE	TRUE	TRUE	TRUE	FALSE	FALSE	TRUE	FALSE	FALSE	FALSE
Mnat_04173	g7543.t1	TRUE	TRUE	TRUE	TRUE	TRUE	FALSE	FALSE	FALSE	FALSE	TRUE
Mnat_04176	g7540.t1	TRUE	TRUE	TRUE	TRUE	TRUE	FALSE	FALSE	FALSE	FALSE	TRUE
Mnat_04182	g7536.t1	TRUE	TRUE	TRUE	TRUE	FALSE	TRUE	FALSE	FALSE	FALSE	TRUE
Mnat_04190	g12492.t1	TRUE	TRUE	TRUE	TRUE	FALSE	TRUE	TRUE	TRUE	FALSE	FALSE
Mnat_04194	g12487.t2	TRUE	TRUE	TRUE	TRUE	TRUE	TRUE	FALSE	FALSE	TRUE	TRUE
Mnat_04208	g23517.t1	TRUE	TRUE	TRUE	TRUE	TRUE	FALSE	FALSE	FALSE	TRUE	TRUE
Mnat_04209	g23518.t1	TRUE	TRUE	TRUE	TRUE	TRUE	TRUE	FALSE	FALSE	FALSE	TRUE
Mnat_04210	g23519.t1;g23519.t2	TRUE	FALSE	FALSE	TRUE	FALSE	FALSE	TRUE	FALSE	FALSE	FALSE
Mnat_04211	g23520.t1	TRUE	TRUE	TRUE	TRUE	FALSE	FALSE	TRUE	FALSE	FALSE	FALSE
Mnat_04212	g23523.t1	TRUE	TRUE	TRUE	TRUE	TRUE	TRUE	FALSE	FALSE	TRUE	TRUE
Mnat_04216	g23526.t1	TRUE	TRUE	TRUE	TRUE	TRUE	TRUE	FALSE	FALSE	FALSE	TRUE
Mnat_04217	g23527.t1	TRUE	TRUE	TRUE	TRUE	TRUE	FALSE	FALSE	FALSE	FALSE	TRUE
Mnat_04218	g23528.t1	TRUE	TRUE	TRUE	TRUE	FALSE	FALSE	TRUE	FALSE	FALSE	FALSE
Mnat_04220	g23530.t3;g23530.t2;g23530.t1	TRUE	FALSE	FALSE	TRUE	FALSE	TRUE	TRUE	TRUE	FALSE	FALSE
Mnat_04221	g23531.t1	TRUE	TRUE	TRUE	TRUE	TRUE	FALSE	FALSE	FALSE	TRUE	TRUE
Mnat_04223	g23532.t1	TRUE	TRUE	TRUE	TRUE	TRUE	FALSE	FALSE	FALSE	FALSE	TRUE
Mnat_04224	g23533.t1	TRUE	TRUE	TRUE	TRUE	FALSE	FALSE	TRUE	FALSE	FALSE	FALSE
Mnat_04225	g23534.t1;g23534.t3;g23534.t2	TRUE	FALSE	FALSE	TRUE	FALSE	TRUE	TRUE	TRUE	FALSE	FALSE
Mnat_04231	g12731.t1	TRUE	TRUE	TRUE	TRUE	TRUE	FALSE	FALSE	FALSE	FALSE	TRUE
Mnat_04232	g12732.t1	TRUE	TRUE	TRUE	TRUE	FALSE	FALSE	TRUE	FALSE	FALSE	FALSE
Mnat_04234	g12733.t2	TRUE	TRUE	TRUE	TRUE	TRUE	FALSE	FALSE	FALSE	TRUE	TRUE
Mnat_04239	g12741.t1	TRUE	TRUE	TRUE	TRUE	FALSE	FALSE	TRUE	FALSE	FALSE	FALSE
Mnat_04240	g12745.t6;g12745.t2;g12745.t7;g12745.t4;g12745.t3	TRUE	FALSE	FALSE	TRUE	FALSE	TRUE	TRUE	TRUE	FALSE	FALSE
Mnat_04243	g12751.t3;g12751.t5;g12751.t4;g12751.t2;g12751.t1	TRUE	FALSE	FALSE	TRUE	TRUE	FALSE	FALSE	FALSE	TRUE	TRUE
Mnat_04244	g12752.t3;g12752.t1;g12752.t2	TRUE	FALSE	FALSE	TRUE	FALSE	FALSE	TRUE	FALSE	FALSE	FALSE
Mnat_04247	g12758.t1	TRUE	TRUE	TRUE	TRUE	FALSE	TRUE	TRUE	TRUE	FALSE	FALSE
Mnat_04254	g2210.t1	TRUE	FALSE	FALSE	FALSE	FALSE	TRUE	TRUE	TRUE	FALSE	FALSE
Mnat_04257	g12770.t2;g12770.t1	TRUE	FALSE	FALSE	TRUE	TRUE	FALSE	FALSE	FALSE	TRUE	TRUE
Mnat_04258	g12771.t1	TRUE	TRUE	TRUE	TRUE	TRUE	FALSE	FALSE	FALSE	TRUE	TRUE
Mnat_04259	g12773.t1	TRUE	TRUE	TRUE	TRUE	TRUE	FALSE	FALSE	FALSE	TRUE	TRUE
Mnat_04260	g12774.t1	TRUE	TRUE	TRUE	TRUE	TRUE	FALSE	FALSE	FALSE	FALSE	TRUE
Mnat_04261	g12775.t1	TRUE	TRUE	TRUE	TRUE	TRUE	FALSE	FALSE	FALSE	TRUE	TRUE
Mnat_04264	g12777.t1	TRUE	TRUE	TRUE	TRUE	TRUE	FALSE	FALSE	FALSE	TRUE	TRUE
Mnat_04265	g12779.t1;g12779.t2;g12779.t3	TRUE	FALSE	FALSE	TRUE	TRUE	FALSE	FALSE	FALSE	TRUE	FALSE
Mnat_04267	g12782.t1	TRUE	TRUE	TRUE	TRUE	TRUE	FALSE	FALSE	FALSE	FALSE	TRUE
Mnat_04268	g12783.t1	TRUE	TRUE	TRUE	TRUE	TRUE	FALSE	FALSE	FALSE	TRUE	TRUE
Mnat_04269	g12784.t1;g12784.t2	TRUE	FALSE	FALSE	TRUE	FALSE	FALSE	TRUE	FALSE	FALSE	FALSE
Mnat_04270	g12787.t2;g12787.t1	TRUE	FALSE	FALSE	TRUE	TRUE	FALSE	FALSE	FALSE	FALSE	TRUE
Mnat_04274	g12789.t1	TRUE	TRUE	TRUE	TRUE	FALSE	FALSE	FALSE	FALSE	FALSE	FALSE
Mnat_04279	g12795.t1	TRUE	TRUE	TRUE	TRUE	TRUE	FALSE	FALSE	FALSE	FALSE	TRUE
Mnat_04280	g12796.t1;g12796.t2	TRUE	FALSE	FALSE	TRUE	TRUE	TRUE	FALSE	FALSE	TRUE	TRUE
Mnat_04281	g12798.t1	TRUE	TRUE	TRUE	TRUE	FALSE	TRUE	FALSE	TRUE	FALSE	FALSE
Mnat_04284	g12800.t2	TRUE	TRUE	TRUE	TRUE	TRUE	FALSE	FALSE	FALSE	TRUE	TRUE
Mnat_04286	g12801.t1	TRUE	TRUE	TRUE	TRUE	TRUE	FALSE	FALSE	FALSE	TRUE	TRUE
Mnat_04287	g12802.t1	TRUE	TRUE	TRUE	TRUE	FALSE	FALSE	TRUE	FALSE	FALSE	FALSE
Mnat_04288	g12803.t2;g12803.t1	TRUE	FALSE	FALSE	TRUE	FALSE	TRUE	TRUE	TRUE	FALSE	FALSE
Mnat_04290	g2027.t1	TRUE	FALSE	FALSE	FALSE	TRUE	FALSE	FALSE	FALSE	TRUE	TRUE
Mnat_04295	g710.t1	TRUE	TRUE	TRUE	TRUE	TRUE	FALSE	FALSE	FALSE	FALSE	TRUE
Mnat_04300	g712.t1	TRUE	FALSE	TRUE	FALSE	FALSE	TRUE	FALSE	FALSE	FALSE	TRUE
Mnat_04301	g713.t1	TRUE	TRUE	TRUE	TRUE	FALSE	TRUE	TRUE	TRUE	FALSE	FALSE
Mnat_04303	g716.t1	TRUE	TRUE	TRUE	TRUE	FALSE	TRUE	TRUE	TRUE	FALSE	FALSE
Mnat_04305	g16936.t1	TRUE	FALSE	FALSE	FALSE	TRUE	FALSE	FALSE	FALSE	FALSE	TRUE
Mnat_04307	g18768.t1;g18768.t2	TRUE	FALSE	FALSE	TRUE	TRUE	FALSE	FALSE	FALSE	FALSE	TRUE
Mnat_04310	g18766.t1	TRUE	TRUE	TRUE	TRUE	TRUE	FALSE	TRUE	FALSE	TRUE	FALSE
Mnat_04314	g18763.t1	TRUE	TRUE	TRUE	TRUE	FALSE	TRUE	TRUE	TRUE	FALSE	FALSE
Mnat_04316	g20491.t1	TRUE	FALSE	FALSE	FALSE	TRUE	FALSE	TRUE	FALSE	TRUE	TRUE
Mnat_04317	g11239.t1	TRUE	FALSE	FALSE	FALSE	TRUE	FALSE	FALSE	FALSE	FALSE	TRUE
Mnat_04319	g2420.t1	TRUE	FALSE	FALSE	FALSE	TRUE	TRUE	FALSE	FALSE	FALSE	TRUE
Mnat_04321	g16636.t1	TRUE	TRUE	TRUE	TRUE	TRUE	TRUE	FALSE	FALSE	TRUE	TRUE
Mnat_04323	g16640.t1	TRUE	TRUE	TRUE	TRUE	FALSE	FALSE	TRUE	FALSE	FALSE	FALSE
Mnat_04326	g16644.t1	TRUE	TRUE	TRUE	TRUE	TRUE	FALSE	FALSE	FALSE	TRUE	TRUE
Mnat_04327	g14250.t1	TRUE	FALSE	TRUE	FALSE	TRUE	FALSE	FALSE	FALSE	FALSE	TRUE
Mnat_04329	g16645.t1	TRUE	TRUE	TRUE	TRUE	TRUE	FALSE	FALSE	FALSE	TRUE	TRUE
Mnat_04330	g16648.t2;g16648.t1	TRUE	FALSE	FALSE	TRUE	FALSE	TRUE	TRUE	TRUE	FALSE	FALSE
Mnat_04335	g20491.t1	TRUE	FALSE	FALSE	FALSE	FALSE	FALSE	TRUE	FALSE	FALSE	FALSE
Mnat_04339	g16662.t1	TRUE	TRUE	TRUE	TRUE	FALSE	TRUE	TRUE	TRUE	FALSE	FALSE
Mnat_04343	g16665.t1	TRUE	TRUE	TRUE	TRUE	FALSE	TRUE	TRUE	TRUE	FALSE	FALSE
Mnat_04344	g16666.t2;g16666.t1	TRUE	FALSE	FALSE	TRUE	FALSE	FALSE	TRUE	FALSE	FALSE	FALSE
Mnat_04346	g16667.t1	TRUE	FALSE	FALSE	FALSE	FALSE	FALSE	TRUE	FALSE	FALSE	FALSE
Mnat_04348	g16668.t2;g16668.t3;g16668.t1	TRUE	FALSE	FALSE	TRUE	FALSE	FALSE	TRUE	FALSE	FALSE	FALSE
Mnat_04349	g16672.t1	TRUE	FALSE	FALSE	FALSE	TRUE	FALSE	FALSE	FALSE	TRUE	TRUE
Mnat_04355	g16673.t2;g16673.t1;g16673.t3	TRUE	FALSE	FALSE	TRUE	FALSE	FALSE	TRUE	FALSE	FALSE	FALSE
Mnat_04359	g16676.t2;g16676.t1	TRUE	FALSE	FALSE	TRUE	FALSE	TRUE	TRUE	TRUE	FALSE	FALSE
Mnat_04360	g16678.t3	TRUE	TRUE	TRUE	TRUE	FALSE	FALSE	TRUE	FALSE	FALSE	FALSE
Mnat_04361	g16678.t2;g16678.t1	TRUE	FALSE	FALSE	TRUE	FALSE	FALSE	TRUE	FALSE	FALSE	FALSE
Mnat_04362	g8536.t1	TRUE	FALSE	FALSE	FALSE	FALSE	TRUE	TRUE	TRUE	FALSE	FALSE
Mnat_04364	g16684.t2;g16684.t4;g16684.t1;g16684.t3	TRUE	FALSE	FALSE	TRUE	FALSE	TRUE	TRUE	TRUE	FALSE	FALSE
Mnat_04370	g16688.t1	TRUE	TRUE	TRUE	TRUE	FALSE	FALSE	TRUE	FALSE	FALSE	FALSE
Mnat_04371	g16689.t1	TRUE	TRUE	TRUE	TRUE	FALSE	FALSE	TRUE	FALSE	FALSE	FALSE
Mnat_04381	g12021.t1;g12021.t2	TRUE	FALSE	FALSE	TRUE	FALSE	FALSE	TRUE	FALSE	FALSE	FALSE
Mnat_04382	g4856.t1	TRUE	FALSE	TRUE	FALSE	TRUE	FALSE	FALSE	FALSE	TRUE	TRUE
Mnat_04383	g12024.t4;g12024.t2	TRUE	FALSE	FALSE	TRUE	TRUE	FALSE	FALSE	FALSE	TRUE	TRUE
Mnat_04384	g12024.t1	TRUE	TRUE	TRUE	TRUE	FALSE	FALSE	TRUE	FALSE	FALSE	FALSE
Mnat_04386	g12029.t2;g12029.t1	TRUE	FALSE	FALSE	TRUE	FALSE	TRUE	TRUE	TRUE	FALSE	FALSE
Mnat_04389	g12126.t1	TRUE	FALSE	FALSE	FALSE	FALSE	FALSE	TRUE	FALSE	FALSE	FALSE
Mnat_04390	g12989.t1	TRUE	TRUE	TRUE	TRUE	FALSE	FALSE	TRUE	FALSE	FALSE	FALSE
Mnat_04391	g7156.t1	TRUE	FALSE	FALSE	FALSE	FALSE	FALSE	TRUE	FALSE	FALSE	FALSE
Mnat_04392	g3862.t1	TRUE	TRUE	TRUE	TRUE	FALSE	FALSE	TRUE	FALSE	FALSE	FALSE
Mnat_04395	g3859.t1	TRUE	TRUE	TRUE	TRUE	TRUE	FALSE	FALSE	FALSE	TRUE	TRUE
Mnat_04396	g3857.t1	TRUE	TRUE	TRUE	TRUE	TRUE	FALSE	FALSE	FALSE	FALSE	TRUE
Mnat_04397	g22839.t1	TRUE	FALSE	FALSE	FALSE	FALSE	TRUE	TRUE	TRUE	FALSE	FALSE
Mnat_04398	g3856.t1	TRUE	TRUE	TRUE	TRUE	FALSE	TRUE	FALSE	TRUE	FALSE	FALSE
Mnat_04400	g3853.t1	TRUE	TRUE	TRUE	TRUE	FALSE	TRUE	TRUE	TRUE	FALSE	FALSE
Mnat_04403	g13852.t1	TRUE	TRUE	TRUE	TRUE	TRUE	FALSE	FALSE	FALSE	FALSE	TRUE
Mnat_04406	g13849.t1	TRUE	TRUE	TRUE	TRUE	FALSE	TRUE	TRUE	TRUE	FALSE	FALSE
Mnat_04407	g13848.t1	TRUE	TRUE	TRUE	TRUE	FALSE	TRUE	TRUE	TRUE	FALSE	FALSE
Mnat_04412	g13840.t1	TRUE	TRUE	TRUE	TRUE	FALSE	FALSE	TRUE	FALSE	FALSE	FALSE
Mnat_04418	g12832.t1	TRUE	TRUE	TRUE	TRUE	TRUE	FALSE	FALSE	FALSE	FALSE	TRUE
Mnat_04419	g12833.t1	TRUE	TRUE	TRUE	TRUE	TRUE	FALSE	FALSE	FALSE	TRUE	TRUE
Mnat_04422	g12839.t1	TRUE	TRUE	TRUE	TRUE	FALSE	FALSE	TRUE	FALSE	FALSE	FALSE
Mnat_04425	g12841.t2	TRUE	TRUE	TRUE	TRUE	FALSE	TRUE	TRUE	TRUE	FALSE	FALSE
Mnat_04432	g12856.t1	TRUE	TRUE	TRUE	TRUE	TRUE	TRUE	FALSE	FALSE	TRUE	TRUE
Mnat_04433	g12857.t1	TRUE	TRUE	TRUE	TRUE	TRUE	FALSE	FALSE	FALSE	FALSE	TRUE
Mnat_04434	g12861.t2;g12861.t1;g12861.t3	TRUE	FALSE	FALSE	TRUE	FALSE	FALSE	TRUE	FALSE	FALSE	FALSE
Mnat_04436	g12866.t2;g12866.t1	TRUE	FALSE	FALSE	TRUE	FALSE	TRUE	TRUE	TRUE	FALSE	FALSE
Mnat_04443	g12873.t1	TRUE	TRUE	TRUE	TRUE	FALSE	FALSE	TRUE	FALSE	FALSE	FALSE
Mnat_04447	g12876.t1	TRUE	TRUE	TRUE	TRUE	TRUE	FALSE	FALSE	FALSE	TRUE	TRUE
Mnat_04450	g12880.t1	TRUE	TRUE	TRUE	TRUE	TRUE	FALSE	FALSE	FALSE	FALSE	TRUE
Mnat_04451	g12881.t1	TRUE	TRUE	TRUE	TRUE	TRUE	FALSE	FALSE	FALSE	TRUE	TRUE
Mnat_04452	g12882.t1	TRUE	TRUE	TRUE	TRUE	TRUE	FALSE	FALSE	FALSE	FALSE	TRUE
Mnat_04453	g12883.t1	TRUE	TRUE	TRUE	TRUE	FALSE	FALSE	TRUE	FALSE	FALSE	FALSE
Mnat_04454	g12884.t2;g12884.t1	TRUE	FALSE	FALSE	TRUE	TRUE	TRUE	FALSE	FALSE	TRUE	TRUE
Mnat_04455	g12885.t1	TRUE	TRUE	TRUE	TRUE	FALSE	FALSE	TRUE	FALSE	FALSE	FALSE
Mnat_04456	g12899.t1;g19183.t1;g1960.t1;g12914.t1;g1957.t2;g12902.t1;g12902.t2;g1957.t1;g12892.t2;g12892.t1	TRUE	FALSE	FALSE	TRUE	FALSE	TRUE	TRUE	TRUE	FALSE	FALSE
Mnat_04459	g19188.t1;g12894.t1;g1964.t1	TRUE	FALSE	FALSE	TRUE	FALSE	FALSE	TRUE	FALSE	FALSE	FALSE
Mnat_04460	g12901.t1;g1956.t1;g1956.t2;g1959.t1;g12916.t1;g19186.t1;g19182.t2;g19182.t1;g19185.t1;g19185.t2;g19192.t1;g12904.t1;g12897.t2;g17584.t1;g19194.t1;g12908.t1;g19180.t1;g1962.t2;g17580.t1;g12906.t2;g12897.t1;g12899.t2;g19192.t2;g12910.t1;g1962.t1;g12906.t1;g17586.t1;g17582.t1;g19196.t1;g19196.t2;g12912.t1	TRUE	FALSE	FALSE	TRUE	FALSE	FALSE	TRUE	FALSE	FALSE	FALSE
Mnat_04462	g1970.t1	TRUE	TRUE	TRUE	TRUE	TRUE	FALSE	FALSE	FALSE	TRUE	TRUE
Mnat_04463	g1971.t1	TRUE	TRUE	TRUE	TRUE	FALSE	TRUE	TRUE	TRUE	FALSE	FALSE
Mnat_04464	g1973.t1	TRUE	TRUE	TRUE	TRUE	TRUE	FALSE	FALSE	FALSE	TRUE	TRUE
Mnat_04466	g1980.t1	TRUE	TRUE	TRUE	TRUE	FALSE	FALSE	TRUE	FALSE	FALSE	FALSE
Mnat_04467	g11147.t1	TRUE	FALSE	TRUE	FALSE	FALSE	FALSE	TRUE	FALSE	FALSE	FALSE
Mnat_04469	g1987.t1;g9581.t1	TRUE	FALSE	FALSE	TRUE	TRUE	TRUE	FALSE	FALSE	TRUE	TRUE
Mnat_04470	g20337.t1	TRUE	FALSE	FALSE	FALSE	TRUE	FALSE	FALSE	FALSE	TRUE	TRUE
Mnat_04471	g1989.t1;g9579.t1	TRUE	FALSE	FALSE	TRUE	TRUE	FALSE	FALSE	FALSE	FALSE	TRUE
Mnat_04472	g9578.t1;g1990.t1;g9578.t2;g1990.t2	TRUE	FALSE	FALSE	TRUE	FALSE	FALSE	FALSE	FALSE	FALSE	FALSE
Mnat_04475	g9577.t1;g9577.t4;g9577.t2;g9577.t3	TRUE	FALSE	FALSE	TRUE	FALSE	FALSE	TRUE	FALSE	FALSE	FALSE
Mnat_04476	g9576.t1	TRUE	TRUE	TRUE	TRUE	TRUE	FALSE	FALSE	FALSE	FALSE	TRUE
Mnat_04477	g9575.t1	TRUE	TRUE	TRUE	TRUE	TRUE	FALSE	FALSE	FALSE	TRUE	TRUE
Mnat_04478	g9574.t1;g9574.t3;g9574.t4	TRUE	FALSE	FALSE	TRUE	FALSE	TRUE	TRUE	TRUE	FALSE	FALSE
Mnat_04479	g9573.t1	TRUE	TRUE	TRUE	TRUE	FALSE	TRUE	TRUE	TRUE	FALSE	FALSE
Mnat_04481	g9572.t2;g9572.t1	TRUE	FALSE	FALSE	TRUE	FALSE	FALSE	TRUE	FALSE	FALSE	FALSE
Mnat_04482	g9570.t2;g9570.t1	TRUE	FALSE	FALSE	TRUE	TRUE	FALSE	FALSE	FALSE	TRUE	TRUE
Mnat_04483	g9569.t1;g9569.t2	TRUE	FALSE	FALSE	TRUE	FALSE	FALSE	TRUE	FALSE	FALSE	FALSE
Mnat_04484	g9566.t1	TRUE	TRUE	TRUE	TRUE	FALSE	FALSE	TRUE	FALSE	FALSE	FALSE
Mnat_04486	g9565.t3;g9565.t8;g9565.t7;g9565.t5;g9565.t4;g9565.t1;g9565.t2;g9565.t6	TRUE	FALSE	FALSE	TRUE	FALSE	FALSE	TRUE	FALSE	FALSE	FALSE
Mnat_04491	g16814.t1	TRUE	TRUE	TRUE	TRUE	TRUE	TRUE	FALSE	FALSE	TRUE	TRUE
Mnat_04495	g22452.t1;g4119.t1	TRUE	FALSE	FALSE	FALSE	FALSE	TRUE	FALSE	TRUE	FALSE	FALSE
Mnat_04500	g16815.t3;g16815.t1;g16815.t2	TRUE	FALSE	FALSE	TRUE	TRUE	TRUE	FALSE	FALSE	TRUE	TRUE
Mnat_04501	g16816.t1;g16816.t3;g16816.t2	TRUE	FALSE	FALSE	TRUE	TRUE	FALSE	FALSE	FALSE	TRUE	TRUE
Mnat_04506	g16821.t1;g16820.t1	TRUE	FALSE	FALSE	TRUE	TRUE	TRUE	FALSE	FALSE	TRUE	TRUE
Mnat_04518	g16851.t1	TRUE	TRUE	TRUE	TRUE	FALSE	TRUE	TRUE	TRUE	FALSE	FALSE
Mnat_04524	g16848.t1	TRUE	TRUE	TRUE	TRUE	FALSE	FALSE	TRUE	FALSE	FALSE	FALSE
Mnat_04525	g16847.t1	TRUE	TRUE	TRUE	TRUE	TRUE	FALSE	FALSE	FALSE	TRUE	TRUE
Mnat_04527	g16846.t1	TRUE	TRUE	TRUE	TRUE	TRUE	TRUE	FALSE	FALSE	TRUE	TRUE
Mnat_04528	g16845.t1	TRUE	FALSE	TRUE	FALSE	TRUE	FALSE	TRUE	FALSE	TRUE	TRUE
Mnat_04529	g16844.t1	TRUE	TRUE	TRUE	TRUE	TRUE	FALSE	FALSE	FALSE	TRUE	TRUE
Mnat_04531	g16842.t1	TRUE	TRUE	TRUE	TRUE	TRUE	FALSE	FALSE	FALSE	TRUE	TRUE
Mnat_04532	g16841.t1;g16841.t2;g16841.t3	TRUE	FALSE	FALSE	TRUE	TRUE	FALSE	FALSE	FALSE	FALSE	TRUE
Mnat_04533	g16840.t1	TRUE	TRUE	TRUE	TRUE	FALSE	FALSE	TRUE	FALSE	FALSE	FALSE
Mnat_04539	g16837.t1	TRUE	TRUE	TRUE	TRUE	FALSE	TRUE	TRUE	TRUE	FALSE	TRUE
Mnat_04541	g16836.t1	TRUE	TRUE	TRUE	TRUE	FALSE	FALSE	TRUE	FALSE	FALSE	FALSE
Mnat_04542	g16835.t1	TRUE	TRUE	TRUE	TRUE	FALSE	FALSE	TRUE	FALSE	FALSE	FALSE
Mnat_04550	g16831.t1;g16831.t2;g16830.t1	TRUE	FALSE	FALSE	TRUE	TRUE	FALSE	TRUE	FALSE	TRUE	TRUE
Mnat_04556	g16829.t1	TRUE	TRUE	TRUE	TRUE	TRUE	FALSE	TRUE	FALSE	TRUE	FALSE
Mnat_04558	g16828.t2;g16828.t3;g16828.t1	TRUE	FALSE	FALSE	TRUE	TRUE	FALSE	FALSE	FALSE	FALSE	TRUE
Mnat_04560	g22452.t1;g4119.t1	TRUE	FALSE	FALSE	FALSE	FALSE	FALSE	TRUE	FALSE	FALSE	FALSE
Mnat_04562	g20491.t1	TRUE	FALSE	FALSE	FALSE	FALSE	FALSE	TRUE	FALSE	FALSE	FALSE
Mnat_04565	g5098.t1	TRUE	FALSE	FALSE	FALSE	FALSE	FALSE	TRUE	FALSE	FALSE	FALSE
Mnat_04566	g16826.t1	TRUE	TRUE	TRUE	TRUE	TRUE	FALSE	FALSE	FALSE	TRUE	TRUE
Mnat_04573	g22452.t1;g4119.t1	TRUE	FALSE	FALSE	FALSE	FALSE	TRUE	TRUE	TRUE	FALSE	FALSE
Mnat_04574	g5099.t1	TRUE	TRUE	TRUE	TRUE	FALSE	FALSE	TRUE	FALSE	FALSE	FALSE
Mnat_04577	g5097.t1	TRUE	TRUE	TRUE	TRUE	TRUE	TRUE	FALSE	FALSE	FALSE	TRUE
Mnat_04578	g5094.t1	TRUE	TRUE	TRUE	TRUE	TRUE	FALSE	FALSE	FALSE	TRUE	TRUE
Mnat_04581	g6582.t1	TRUE	FALSE	FALSE	FALSE	FALSE	FALSE	FALSE	FALSE	FALSE	FALSE
Mnat_04588	g22861.t1	TRUE	FALSE	FALSE	FALSE	FALSE	TRUE	TRUE	TRUE	FALSE	FALSE
Mnat_04590	g1507.t3	TRUE	TRUE	TRUE	TRUE	FALSE	TRUE	TRUE	TRUE	FALSE	FALSE
Mnat_04592	g1506.t1;g1506.t2	TRUE	FALSE	FALSE	TRUE	TRUE	FALSE	FALSE	FALSE	TRUE	TRUE
Mnat_04597	g1497.t1	TRUE	TRUE	TRUE	TRUE	TRUE	TRUE	FALSE	FALSE	TRUE	TRUE
Mnat_04598	g1496.t1	TRUE	TRUE	TRUE	TRUE	TRUE	TRUE	FALSE	FALSE	TRUE	TRUE
Mnat_04599	g1495.t2;g1495.t1	TRUE	FALSE	FALSE	TRUE	FALSE	FALSE	TRUE	FALSE	FALSE	FALSE
Mnat_04600	g1493.t1	TRUE	TRUE	TRUE	TRUE	FALSE	FALSE	TRUE	FALSE	FALSE	FALSE
Mnat_04602	g1488.t1	TRUE	TRUE	TRUE	TRUE	TRUE	TRUE	FALSE	FALSE	FALSE	TRUE
Mnat_04604	g1486.t1	TRUE	TRUE	TRUE	TRUE	FALSE	TRUE	TRUE	TRUE	FALSE	FALSE
Mnat_04605	g5098.t1	TRUE	FALSE	FALSE	FALSE	FALSE	TRUE	TRUE	TRUE	FALSE	FALSE
Mnat_04607	g1485.t1	TRUE	TRUE	TRUE	TRUE	FALSE	TRUE	TRUE	TRUE	FALSE	TRUE
Mnat_04610	g1483.t3;g1483.t5;g1483.t1;g1483.t2;g1483.t7;g1483.t8;g1483.t6;g1483.t4	TRUE	FALSE	FALSE	TRUE	FALSE	FALSE	TRUE	FALSE	FALSE	FALSE
Mnat_04613	g1472.t1	TRUE	TRUE	TRUE	TRUE	TRUE	FALSE	FALSE	FALSE	TRUE	TRUE
Mnat_04614	g1471.t1	TRUE	TRUE	TRUE	TRUE	TRUE	FALSE	FALSE	FALSE	TRUE	TRUE
Mnat_04616	g1470.t1	TRUE	TRUE	TRUE	TRUE	TRUE	FALSE	FALSE	FALSE	FALSE	TRUE
Mnat_04617	g1469.t1	TRUE	TRUE	TRUE	TRUE	TRUE	FALSE	FALSE	FALSE	FALSE	TRUE
Mnat_04619	g1465.t1	TRUE	TRUE	TRUE	TRUE	FALSE	TRUE	FALSE	FALSE	FALSE	TRUE
Mnat_04620	g1464.t2;g1464.t1	TRUE	FALSE	FALSE	TRUE	TRUE	TRUE	FALSE	FALSE	FALSE	TRUE
Mnat_04621	g1463.t1;g1463.t2	TRUE	FALSE	FALSE	TRUE	TRUE	FALSE	FALSE	FALSE	TRUE	TRUE
Mnat_04622	g1462.t1	TRUE	TRUE	TRUE	TRUE	FALSE	FALSE	FALSE	FALSE	FALSE	FALSE
Mnat_04623	g1460.t1	TRUE	TRUE	TRUE	TRUE	TRUE	FALSE	FALSE	FALSE	TRUE	TRUE
Mnat_04626	g1455.t4;g1455.t3;g1455.t1;g1455.t2	TRUE	FALSE	FALSE	TRUE	FALSE	FALSE	TRUE	FALSE	FALSE	FALSE
Mnat_04631	g1452.t1	TRUE	TRUE	TRUE	TRUE	FALSE	FALSE	TRUE	FALSE	FALSE	FALSE
Mnat_04632	g1451.t1	TRUE	TRUE	TRUE	TRUE	TRUE	TRUE	FALSE	FALSE	TRUE	TRUE
Mnat_04633	g1449.t3	TRUE	TRUE	TRUE	TRUE	FALSE	FALSE	TRUE	FALSE	FALSE	FALSE
Mnat_04634	g1448.t2;g1448.t1	TRUE	FALSE	FALSE	TRUE	FALSE	FALSE	TRUE	FALSE	FALSE	FALSE
Mnat_04636	g12701.t2;g12701.t1	TRUE	FALSE	FALSE	FALSE	TRUE	FALSE	FALSE	FALSE	TRUE	TRUE
Mnat_04637	g1445.t1	TRUE	TRUE	TRUE	TRUE	TRUE	FALSE	FALSE	FALSE	TRUE	TRUE
Mnat_04638	g1444.t1	TRUE	TRUE	TRUE	TRUE	TRUE	FALSE	FALSE	FALSE	TRUE	TRUE
Mnat_04639	g1443.t1	TRUE	TRUE	TRUE	TRUE	TRUE	FALSE	FALSE	FALSE	TRUE	TRUE
Mnat_04643	g1439.t1	TRUE	TRUE	TRUE	TRUE	FALSE	FALSE	FALSE	FALSE	FALSE	FALSE
Mnat_04645	g1434.t1;g1434.t2;g1434.t3;g1434.t4	TRUE	FALSE	FALSE	TRUE	FALSE	FALSE	TRUE	FALSE	FALSE	FALSE
Mnat_04646	g1432.t1	TRUE	TRUE	TRUE	TRUE	FALSE	FALSE	TRUE	FALSE	FALSE	FALSE
Mnat_04648	g1430.t1	TRUE	TRUE	TRUE	TRUE	FALSE	FALSE	TRUE	FALSE	FALSE	FALSE
Mnat_04651	g20491.t1	TRUE	FALSE	FALSE	FALSE	FALSE	TRUE	TRUE	TRUE	FALSE	FALSE
Mnat_04653	g1422.t1	TRUE	TRUE	TRUE	TRUE	TRUE	FALSE	FALSE	FALSE	TRUE	TRUE
Mnat_04654	g1421.t1	TRUE	TRUE	TRUE	TRUE	TRUE	FALSE	FALSE	FALSE	TRUE	TRUE
Mnat_04655	g1420.t1	TRUE	TRUE	TRUE	TRUE	TRUE	TRUE	FALSE	FALSE	TRUE	TRUE
Mnat_04658	g1417.t1	TRUE	TRUE	TRUE	TRUE	TRUE	FALSE	FALSE	FALSE	TRUE	TRUE
Mnat_04664	g1407.t3	TRUE	TRUE	TRUE	TRUE	FALSE	TRUE	TRUE	TRUE	FALSE	FALSE
Mnat_04665	g1405.t1	TRUE	TRUE	TRUE	TRUE	FALSE	FALSE	TRUE	FALSE	FALSE	FALSE
Mnat_04669	g23179.t1	TRUE	FALSE	FALSE	FALSE	FALSE	FALSE	TRUE	FALSE	FALSE	FALSE
Mnat_04672	g1396.t1	TRUE	TRUE	TRUE	TRUE	TRUE	FALSE	FALSE	FALSE	FALSE	TRUE
Mnat_04673	g1395.t1	TRUE	TRUE	TRUE	TRUE	FALSE	FALSE	TRUE	FALSE	FALSE	FALSE
Mnat_04674	g13675.t2;g13675.t1	TRUE	FALSE	FALSE	FALSE	TRUE	TRUE	FALSE	FALSE	TRUE	TRUE
Mnat_04677	g1390.t1	TRUE	TRUE	TRUE	TRUE	TRUE	FALSE	FALSE	FALSE	TRUE	TRUE
Mnat_04678	g1389.t1	TRUE	TRUE	TRUE	TRUE	TRUE	FALSE	FALSE	FALSE	TRUE	TRUE
Mnat_04680	g1387.t1	TRUE	TRUE	TRUE	TRUE	FALSE	FALSE	TRUE	FALSE	FALSE	FALSE
Mnat_04682	g1386.t1	TRUE	TRUE	TRUE	TRUE	TRUE	FALSE	FALSE	FALSE	TRUE	TRUE
Mnat_04683	g1385.t2;g1385.t1	TRUE	FALSE	FALSE	TRUE	FALSE	FALSE	TRUE	FALSE	FALSE	FALSE
Mnat_04685	g709.t2;g709.t4;g709.t3;g709.t1	TRUE	FALSE	FALSE	TRUE	FALSE	FALSE	TRUE	FALSE	FALSE	FALSE
Mnat_04687	g708.t1	TRUE	TRUE	TRUE	TRUE	TRUE	FALSE	FALSE	FALSE	FALSE	TRUE
Mnat_04688	g704.t1	TRUE	TRUE	TRUE	TRUE	FALSE	TRUE	FALSE	FALSE	FALSE	TRUE
Mnat_04690	g700.t4;g700.t3;g700.t1;g700.t2	TRUE	FALSE	FALSE	TRUE	FALSE	TRUE	TRUE	TRUE	FALSE	FALSE
Mnat_04691	g20217.t1	TRUE	TRUE	TRUE	TRUE	TRUE	FALSE	FALSE	FALSE	FALSE	TRUE
Mnat_04693	g20220.t2;g20220.t4;g20220.t1;g20220.t3	TRUE	FALSE	FALSE	TRUE	TRUE	FALSE	FALSE	FALSE	TRUE	TRUE
Mnat_04695	g18958.t1	TRUE	FALSE	FALSE	FALSE	FALSE	FALSE	TRUE	FALSE	FALSE	FALSE
Mnat_04699	g20227.t1	TRUE	TRUE	TRUE	TRUE	TRUE	FALSE	FALSE	FALSE	TRUE	TRUE
Mnat_04700	g20228.t1	TRUE	TRUE	TRUE	TRUE	TRUE	TRUE	FALSE	FALSE	TRUE	TRUE
Mnat_04702	g20229.t8;g20229.t1;g20229.t3;g20229.t6;g20229.t9;g20229.t7;g20229.t2;g20229.t5;g20229.t4	TRUE	FALSE	FALSE	TRUE	FALSE	TRUE	TRUE	TRUE	FALSE	FALSE
Mnat_04703	g20236.t1	TRUE	TRUE	TRUE	TRUE	TRUE	FALSE	FALSE	FALSE	FALSE	TRUE
Mnat_04705	g20239.t1	TRUE	TRUE	TRUE	TRUE	TRUE	TRUE	FALSE	FALSE	TRUE	TRUE
Mnat_04706	g22391.t1	TRUE	TRUE	TRUE	TRUE	TRUE	TRUE	FALSE	FALSE	TRUE	TRUE
Mnat_04712	g22397.t1	TRUE	TRUE	TRUE	TRUE	TRUE	FALSE	TRUE	FALSE	TRUE	TRUE
Mnat_04713	g22398.t1;g22398.t3;g22398.t9;g22398.t10;g22398.t15;g22398.t12;g22398.t13;g22398.t14;g22398.t8;g22398.t7;g22398.t16;g22398.t11;g22398.t6;g22398.t2;g22398.t4;g22398.t5	TRUE	FALSE	FALSE	TRUE	FALSE	TRUE	TRUE	TRUE	FALSE	FALSE
Mnat_04714	g2762.t1;g22399.t2;g22399.t1	TRUE	FALSE	FALSE	TRUE	TRUE	FALSE	FALSE	FALSE	TRUE	TRUE
Mnat_04716	g12644.t1	TRUE	TRUE	TRUE	TRUE	FALSE	TRUE	TRUE	TRUE	FALSE	FALSE
Mnat_04718	g20491.t1	TRUE	FALSE	FALSE	FALSE	FALSE	FALSE	TRUE	FALSE	FALSE	FALSE
Mnat_04743	g22452.t1;g4119.t1	TRUE	FALSE	FALSE	FALSE	FALSE	FALSE	TRUE	FALSE	FALSE	FALSE
Mnat_04746	g2210.t1	TRUE	FALSE	FALSE	FALSE	FALSE	TRUE	TRUE	TRUE	FALSE	FALSE
Mnat_04747	g7477.t1	TRUE	FALSE	FALSE	FALSE	FALSE	FALSE	TRUE	FALSE	FALSE	FALSE
Mnat_04749	g22452.t1;g4119.t1	TRUE	FALSE	FALSE	FALSE	FALSE	TRUE	TRUE	TRUE	FALSE	FALSE
Mnat_04756	g12658.t2;g12658.t1;g12658.t3	TRUE	FALSE	FALSE	TRUE	FALSE	FALSE	TRUE	FALSE	FALSE	FALSE
Mnat_04758	g20491.t1	TRUE	FALSE	FALSE	FALSE	FALSE	FALSE	TRUE	FALSE	FALSE	FALSE
Mnat_04759	g22861.t1	TRUE	FALSE	FALSE	FALSE	FALSE	TRUE	TRUE	TRUE	FALSE	FALSE
Mnat_04763	g12663.t1	TRUE	TRUE	TRUE	TRUE	FALSE	FALSE	TRUE	FALSE	FALSE	FALSE
Mnat_04767	g12668.t2;g12668.t1;g12668.t3	TRUE	FALSE	FALSE	TRUE	TRUE	FALSE	FALSE	FALSE	TRUE	TRUE
Mnat_04770	g10674.t1	TRUE	FALSE	FALSE	FALSE	FALSE	FALSE	TRUE	FALSE	FALSE	FALSE
Mnat_04772	g12669.t1;g12669.t2	TRUE	FALSE	FALSE	TRUE	FALSE	FALSE	TRUE	FALSE	FALSE	FALSE
Mnat_04776	g12670.t1	TRUE	TRUE	TRUE	TRUE	TRUE	FALSE	FALSE	FALSE	TRUE	TRUE
Mnat_04778	g12672.t1	TRUE	TRUE	TRUE	TRUE	FALSE	FALSE	TRUE	FALSE	FALSE	FALSE
Mnat_04790	g19387.t1	TRUE	TRUE	TRUE	TRUE	FALSE	FALSE	TRUE	FALSE	FALSE	FALSE
Mnat_04791	g20491.t1	TRUE	FALSE	FALSE	FALSE	FALSE	FALSE	TRUE	FALSE	FALSE	FALSE
Mnat_04797	g19382.t1	TRUE	TRUE	TRUE	TRUE	FALSE	FALSE	TRUE	FALSE	FALSE	FALSE
Mnat_04803	g19374.t1	TRUE	TRUE	TRUE	TRUE	FALSE	TRUE	FALSE	FALSE	FALSE	TRUE
Mnat_04804	g22452.t1;g4119.t1	TRUE	FALSE	FALSE	FALSE	FALSE	TRUE	TRUE	TRUE	FALSE	FALSE
Mnat_04806	g19371.t1	TRUE	TRUE	TRUE	TRUE	FALSE	FALSE	TRUE	FALSE	FALSE	FALSE
Mnat_04814	g19355.t1	TRUE	TRUE	TRUE	TRUE	TRUE	FALSE	FALSE	FALSE	TRUE	TRUE
Mnat_04815	g19354.t1	TRUE	TRUE	TRUE	TRUE	TRUE	FALSE	FALSE	FALSE	TRUE	TRUE
Mnat_04818	g19351.t1	TRUE	TRUE	TRUE	TRUE	TRUE	FALSE	FALSE	FALSE	TRUE	TRUE
Mnat_04821	g22452.t1;g4119.t1	TRUE	FALSE	FALSE	FALSE	FALSE	TRUE	TRUE	TRUE	FALSE	FALSE
Mnat_04822	g22452.t1;g4119.t1	TRUE	FALSE	FALSE	FALSE	FALSE	TRUE	TRUE	TRUE	FALSE	FALSE
Mnat_04824	g19342.t3	TRUE	TRUE	TRUE	TRUE	TRUE	FALSE	FALSE	FALSE	TRUE	TRUE
Mnat_04830	g2210.t1	TRUE	FALSE	FALSE	FALSE	FALSE	FALSE	TRUE	FALSE	FALSE	FALSE
Mnat_04834	g8328.t1	TRUE	TRUE	TRUE	TRUE	FALSE	TRUE	FALSE	FALSE	FALSE	TRUE
Mnat_04838	g16517.t1	TRUE	FALSE	FALSE	FALSE	FALSE	TRUE	TRUE	TRUE	FALSE	FALSE
Mnat_04850	g22452.t1;g4119.t1	TRUE	FALSE	FALSE	FALSE	FALSE	FALSE	TRUE	FALSE	FALSE	FALSE
Mnat_04854	g8117.t1	TRUE	FALSE	FALSE	FALSE	FALSE	FALSE	TRUE	FALSE	FALSE	FALSE
Mnat_04855	g8536.t1	TRUE	FALSE	FALSE	FALSE	FALSE	FALSE	TRUE	FALSE	FALSE	FALSE
Mnat_04859	g3368.t1	TRUE	FALSE	FALSE	FALSE	FALSE	FALSE	TRUE	FALSE	FALSE	FALSE
Mnat_04860	g638.t3;g638.t2;g638.t4;g638.t1	TRUE	FALSE	FALSE	TRUE	FALSE	TRUE	TRUE	TRUE	FALSE	FALSE
Mnat_04872	g644.t2	TRUE	TRUE	TRUE	TRUE	FALSE	TRUE	TRUE	TRUE	FALSE	FALSE
Mnat_04874	g14791.t1	TRUE	TRUE	TRUE	TRUE	TRUE	FALSE	FALSE	FALSE	TRUE	TRUE
Mnat_04877	g14790.t1	TRUE	TRUE	TRUE	TRUE	TRUE	FALSE	FALSE	FALSE	TRUE	TRUE
Mnat_04880	g14783.t1	TRUE	TRUE	TRUE	TRUE	TRUE	FALSE	TRUE	FALSE	TRUE	FALSE
Mnat_04881	g8039.t2	TRUE	TRUE	TRUE	TRUE	FALSE	FALSE	TRUE	FALSE	FALSE	FALSE
Mnat_04884	g8035.t1	TRUE	TRUE	TRUE	TRUE	TRUE	TRUE	FALSE	FALSE	TRUE	TRUE
Mnat_04887	g22452.t1;g4119.t1	TRUE	FALSE	FALSE	FALSE	FALSE	TRUE	TRUE	TRUE	FALSE	FALSE
Mnat_04889	g8030.t1	TRUE	TRUE	TRUE	TRUE	FALSE	FALSE	TRUE	FALSE	FALSE	FALSE
Mnat_04890	g4673.t1	TRUE	FALSE	FALSE	FALSE	FALSE	FALSE	TRUE	FALSE	FALSE	FALSE
Mnat_04900	g8028.t1	TRUE	TRUE	TRUE	TRUE	TRUE	TRUE	FALSE	FALSE	TRUE	TRUE
Mnat_04913	g8021.t1;g13832.t1	TRUE	FALSE	FALSE	TRUE	TRUE	TRUE	FALSE	FALSE	TRUE	TRUE
Mnat_04916	g149.t1	TRUE	FALSE	FALSE	FALSE	FALSE	FALSE	TRUE	FALSE	FALSE	FALSE
Mnat_04917	g8019.t1;g8019.t2	TRUE	FALSE	FALSE	TRUE	FALSE	TRUE	TRUE	TRUE	FALSE	FALSE
Mnat_04919	g8017.t1;g8017.t2	TRUE	FALSE	FALSE	TRUE	TRUE	FALSE	FALSE	FALSE	FALSE	TRUE
Mnat_04920	g8015.t1	TRUE	TRUE	TRUE	TRUE	FALSE	FALSE	TRUE	FALSE	FALSE	FALSE
Mnat_04926	g8011.t1	TRUE	TRUE	TRUE	TRUE	FALSE	FALSE	TRUE	FALSE	FALSE	FALSE
Mnat_04930	g8009.t1	TRUE	TRUE	TRUE	TRUE	FALSE	TRUE	TRUE	TRUE	FALSE	TRUE
Mnat_04931	g8008.t1	TRUE	TRUE	TRUE	TRUE	FALSE	FALSE	TRUE	FALSE	FALSE	FALSE
Mnat_04932	g8006.t1	TRUE	TRUE	TRUE	TRUE	TRUE	TRUE	FALSE	FALSE	TRUE	TRUE
Mnat_04936	g8004.t3;g8004.t1;g8004.t2	TRUE	FALSE	FALSE	TRUE	FALSE	FALSE	TRUE	FALSE	FALSE	FALSE
Mnat_04950	g2210.t1	TRUE	FALSE	FALSE	FALSE	FALSE	FALSE	TRUE	FALSE	FALSE	FALSE
Mnat_04953	g18958.t1	TRUE	FALSE	FALSE	FALSE	FALSE	FALSE	TRUE	FALSE	FALSE	FALSE
Mnat_04954	g16517.t1	TRUE	FALSE	FALSE	FALSE	FALSE	FALSE	TRUE	FALSE	FALSE	FALSE
Mnat_04961	g21416.t1;g21416.t2	TRUE	FALSE	FALSE	TRUE	FALSE	FALSE	TRUE	FALSE	FALSE	FALSE
Mnat_04966	g21415.t1	TRUE	TRUE	TRUE	TRUE	TRUE	FALSE	TRUE	FALSE	TRUE	TRUE
Mnat_04971	g13669.t1	TRUE	FALSE	TRUE	FALSE	FALSE	TRUE	TRUE	TRUE	FALSE	FALSE
Mnat_04977	g21411.t1	TRUE	TRUE	TRUE	TRUE	FALSE	FALSE	TRUE	FALSE	FALSE	FALSE
Mnat_04978	g21410.t1	TRUE	TRUE	TRUE	TRUE	FALSE	FALSE	TRUE	FALSE	FALSE	FALSE
Mnat_04982	g21404.t3	TRUE	TRUE	TRUE	TRUE	TRUE	TRUE	FALSE	FALSE	FALSE	TRUE
Mnat_04990	g21401.t2;g21401.t4;g21401.t3;g21401.t5;g21401.t1	TRUE	FALSE	FALSE	TRUE	FALSE	FALSE	TRUE	FALSE	FALSE	FALSE
Mnat_04996	g22452.t1;g4119.t1	TRUE	FALSE	FALSE	FALSE	FALSE	FALSE	TRUE	FALSE	FALSE	FALSE
Mnat_04998	g3908.t1	TRUE	FALSE	FALSE	FALSE	FALSE	FALSE	TRUE	FALSE	FALSE	FALSE
Mnat_04999	g21398.t1	TRUE	TRUE	TRUE	TRUE	FALSE	TRUE	TRUE	TRUE	FALSE	FALSE
Mnat_05001	g21396.t1	TRUE	TRUE	TRUE	TRUE	TRUE	FALSE	TRUE	FALSE	TRUE	FALSE
Mnat_05002	g21395.t2;g21395.t1	TRUE	FALSE	FALSE	TRUE	TRUE	FALSE	FALSE	FALSE	TRUE	TRUE
Mnat_05003	g21394.t2	TRUE	TRUE	TRUE	TRUE	TRUE	FALSE	FALSE	FALSE	FALSE	TRUE
Mnat_05004	g21393.t2;g21393.t1	TRUE	FALSE	FALSE	TRUE	TRUE	TRUE	FALSE	FALSE	TRUE	TRUE
Mnat_05005	g2210.t1	TRUE	FALSE	FALSE	FALSE	FALSE	TRUE	TRUE	TRUE	FALSE	FALSE
Mnat_05011	g14310.t1	TRUE	TRUE	TRUE	TRUE	FALSE	TRUE	TRUE	TRUE	FALSE	FALSE
Mnat_05012	g14311.t1	TRUE	TRUE	TRUE	TRUE	FALSE	TRUE	TRUE	TRUE	FALSE	FALSE
Mnat_05021	g20491.t1	TRUE	FALSE	FALSE	FALSE	FALSE	FALSE	TRUE	FALSE	FALSE	FALSE
Mnat_05022	g10794.t1	TRUE	FALSE	FALSE	FALSE	FALSE	TRUE	TRUE	TRUE	FALSE	FALSE
Mnat_05027	g16272.t1	TRUE	TRUE	TRUE	TRUE	TRUE	TRUE	FALSE	FALSE	TRUE	TRUE
Mnat_05030	g16268.t1	TRUE	FALSE	FALSE	FALSE	FALSE	TRUE	TRUE	TRUE	FALSE	TRUE
Mnat_05031	g16265.t1	TRUE	TRUE	TRUE	TRUE	FALSE	TRUE	TRUE	TRUE	FALSE	TRUE
Mnat_05033	g23079.t1;g16261.t1	TRUE	FALSE	FALSE	TRUE	FALSE	FALSE	TRUE	FALSE	FALSE	FALSE
Mnat_05035	g12385.t2	TRUE	TRUE	TRUE	TRUE	FALSE	FALSE	TRUE	FALSE	FALSE	FALSE
Mnat_05036	g16258.t1	TRUE	TRUE	TRUE	TRUE	FALSE	TRUE	TRUE	TRUE	FALSE	FALSE
Mnat_05055	g16245.t1	TRUE	TRUE	TRUE	TRUE	TRUE	TRUE	FALSE	FALSE	FALSE	TRUE
Mnat_05059	g16244.t1;g16244.t5;g16244.t3;g16244.t2;g16244.t6;g16244.t4	TRUE	FALSE	FALSE	TRUE	FALSE	TRUE	TRUE	TRUE	FALSE	FALSE
Mnat_05061	g16243.t1	TRUE	TRUE	TRUE	TRUE	TRUE	FALSE	FALSE	FALSE	TRUE	TRUE
Mnat_05067	g2210.t1	TRUE	FALSE	FALSE	FALSE	TRUE	FALSE	FALSE	FALSE	TRUE	TRUE
Mnat_05068	g16242.t3;g16242.t4;g16242.t5;g16242.t1;g16242.t2	TRUE	FALSE	FALSE	TRUE	FALSE	FALSE	TRUE	FALSE	FALSE	FALSE
Mnat_05069	g16237.t1	TRUE	TRUE	TRUE	TRUE	TRUE	FALSE	FALSE	FALSE	TRUE	TRUE
Mnat_05070	g16236.t2	TRUE	TRUE	TRUE	TRUE	TRUE	FALSE	FALSE	FALSE	TRUE	TRUE
Mnat_05071	g16235.t1;g16235.t2	TRUE	FALSE	FALSE	TRUE	TRUE	FALSE	FALSE	FALSE	TRUE	FALSE
Mnat_05087	g16517.t1	TRUE	FALSE	FALSE	FALSE	FALSE	FALSE	TRUE	FALSE	FALSE	FALSE
Mnat_05094	g13692.t4;g13692.t3;g13692.t1;g13692.t2	TRUE	FALSE	FALSE	TRUE	FALSE	FALSE	TRUE	FALSE	FALSE	FALSE
Mnat_05098	g13696.t1	TRUE	TRUE	TRUE	TRUE	FALSE	FALSE	TRUE	FALSE	FALSE	FALSE
Mnat_05102	g13701.t1	TRUE	TRUE	TRUE	TRUE	TRUE	FALSE	FALSE	FALSE	FALSE	TRUE
Mnat_05109	g13703.t1	TRUE	TRUE	TRUE	TRUE	FALSE	TRUE	TRUE	TRUE	FALSE	FALSE
Mnat_05111	g15052.t1	TRUE	FALSE	FALSE	FALSE	FALSE	TRUE	TRUE	TRUE	FALSE	FALSE
Mnat_05114	g13707.t3;g13707.t1;g13707.t2	TRUE	FALSE	FALSE	TRUE	FALSE	TRUE	TRUE	TRUE	FALSE	FALSE
Mnat_05115	g13708.t2;g13708.t1	TRUE	FALSE	FALSE	TRUE	FALSE	TRUE	TRUE	TRUE	FALSE	FALSE
Mnat_05118	g13711.t1	TRUE	TRUE	TRUE	TRUE	TRUE	FALSE	FALSE	FALSE	TRUE	TRUE
Mnat_05119	g22452.t1;g4119.t1	TRUE	FALSE	FALSE	FALSE	FALSE	FALSE	TRUE	FALSE	FALSE	FALSE
Mnat_05120	g22861.t1	TRUE	FALSE	FALSE	FALSE	FALSE	FALSE	TRUE	FALSE	FALSE	FALSE
Mnat_05124	g13714.t1;g13714.t2	TRUE	FALSE	FALSE	TRUE	FALSE	FALSE	TRUE	FALSE	FALSE	FALSE
Mnat_05126	g13716.t1	TRUE	TRUE	TRUE	TRUE	TRUE	FALSE	FALSE	FALSE	FALSE	TRUE
Mnat_05138	g2210.t1	TRUE	FALSE	FALSE	FALSE	FALSE	TRUE	TRUE	TRUE	FALSE	FALSE
Mnat_05141	g13722.t1	TRUE	TRUE	TRUE	TRUE	FALSE	FALSE	TRUE	FALSE	FALSE	FALSE
Mnat_05146	g13724.t1;g13724.t3;g13724.t2;g13729.t1	TRUE	FALSE	FALSE	TRUE	FALSE	FALSE	TRUE	FALSE	FALSE	FALSE
Mnat_05150	g13649.t1	TRUE	FALSE	FALSE	FALSE	FALSE	TRUE	TRUE	TRUE	FALSE	FALSE
Mnat_05151	g22452.t1;g4119.t1	TRUE	FALSE	FALSE	FALSE	FALSE	FALSE	TRUE	FALSE	FALSE	FALSE
Mnat_05154	g17519.t1	TRUE	FALSE	FALSE	FALSE	FALSE	FALSE	TRUE	FALSE	FALSE	FALSE
Mnat_05166	g18958.t1	TRUE	FALSE	FALSE	FALSE	FALSE	FALSE	TRUE	FALSE	FALSE	FALSE
Mnat_05170	g5098.t1	TRUE	FALSE	FALSE	FALSE	FALSE	FALSE	TRUE	FALSE	FALSE	FALSE
Mnat_05172	g13730.t1	TRUE	FALSE	FALSE	FALSE	FALSE	TRUE	TRUE	TRUE	FALSE	FALSE
Mnat_05173	g13731.t1	TRUE	TRUE	TRUE	TRUE	TRUE	TRUE	FALSE	FALSE	TRUE	TRUE
Mnat_05182	g15199.t1;g7357.t2;g7357.t1	TRUE	FALSE	FALSE	TRUE	TRUE	FALSE	FALSE	FALSE	TRUE	TRUE
Mnat_05185	g15166.t1	TRUE	FALSE	FALSE	FALSE	FALSE	TRUE	TRUE	TRUE	FALSE	FALSE
Mnat_05189	g7354.t1	TRUE	TRUE	TRUE	TRUE	TRUE	TRUE	FALSE	FALSE	TRUE	TRUE
Mnat_05197	g7349.t1	TRUE	TRUE	TRUE	TRUE	FALSE	FALSE	TRUE	FALSE	FALSE	FALSE
Mnat_05200	g7345.t1	TRUE	TRUE	TRUE	TRUE	TRUE	FALSE	FALSE	FALSE	TRUE	TRUE
Mnat_05201	g7343.t2;g7343.t1	TRUE	FALSE	FALSE	TRUE	FALSE	TRUE	TRUE	TRUE	FALSE	FALSE
Mnat_05207	g4465.t2;g4465.t1	TRUE	FALSE	FALSE	FALSE	TRUE	TRUE	FALSE	FALSE	TRUE	TRUE
Mnat_05211	g7336.t1	TRUE	TRUE	TRUE	TRUE	TRUE	FALSE	FALSE	FALSE	TRUE	TRUE
Mnat_05214	g5098.t1	TRUE	FALSE	FALSE	FALSE	TRUE	TRUE	FALSE	FALSE	TRUE	TRUE
Mnat_05216	g7330.t1	TRUE	TRUE	TRUE	TRUE	TRUE	FALSE	FALSE	FALSE	FALSE	TRUE
Mnat_05218	g7329.t4;g7329.t3;g7329.t2;g7329.t1	TRUE	FALSE	FALSE	TRUE	TRUE	FALSE	FALSE	FALSE	TRUE	TRUE
Mnat_05223	g7325.t1	TRUE	TRUE	TRUE	TRUE	FALSE	TRUE	TRUE	TRUE	FALSE	FALSE
Mnat_05224	g4092.t1	TRUE	TRUE	TRUE	TRUE	FALSE	FALSE	TRUE	FALSE	FALSE	FALSE
Mnat_05226	g4095.t1;g4095.t2	TRUE	FALSE	FALSE	TRUE	FALSE	FALSE	FALSE	FALSE	FALSE	FALSE
Mnat_05228	g4097.t2;g4097.t1	TRUE	FALSE	FALSE	TRUE	TRUE	TRUE	FALSE	FALSE	TRUE	TRUE
Mnat_05234	g4101.t1	TRUE	TRUE	TRUE	TRUE	TRUE	TRUE	FALSE	FALSE	TRUE	TRUE
Mnat_05235	g4102.t1;g4102.t2	TRUE	FALSE	FALSE	TRUE	FALSE	FALSE	TRUE	FALSE	FALSE	FALSE
Mnat_05239	g4108.t1	TRUE	TRUE	TRUE	TRUE	TRUE	FALSE	FALSE	FALSE	TRUE	TRUE
Mnat_05240	g4109.t1	TRUE	TRUE	TRUE	TRUE	TRUE	TRUE	FALSE	FALSE	FALSE	TRUE
Mnat_05243	g4112.t1	TRUE	TRUE	TRUE	TRUE	TRUE	FALSE	FALSE	FALSE	TRUE	TRUE
Mnat_05244	g4113.t1	TRUE	FALSE	TRUE	FALSE	TRUE	FALSE	FALSE	FALSE	TRUE	TRUE
Mnat_05247	g4117.t2;g4117.t1;g4117.t4	TRUE	FALSE	FALSE	TRUE	TRUE	FALSE	FALSE	FALSE	FALSE	TRUE
Mnat_05253	g4124.t4	TRUE	TRUE	TRUE	TRUE	FALSE	FALSE	TRUE	FALSE	FALSE	FALSE
Mnat_05254	g6500.t1	TRUE	FALSE	TRUE	FALSE	TRUE	FALSE	FALSE	FALSE	TRUE	TRUE
Mnat_05256	g4135.t3;g4135.t2;g4135.t1	TRUE	FALSE	FALSE	TRUE	FALSE	TRUE	TRUE	TRUE	FALSE	FALSE
Mnat_05257	g11911.t1	TRUE	TRUE	TRUE	TRUE	TRUE	TRUE	FALSE	FALSE	TRUE	TRUE
Mnat_05260	g11907.t1	TRUE	TRUE	TRUE	TRUE	FALSE	TRUE	FALSE	TRUE	FALSE	TRUE
Mnat_05262	g11905.t2;g11905.t1	TRUE	FALSE	FALSE	TRUE	TRUE	FALSE	FALSE	FALSE	FALSE	TRUE
Mnat_05263	g11904.t1	TRUE	TRUE	TRUE	TRUE	FALSE	FALSE	TRUE	FALSE	FALSE	FALSE
Mnat_05265	g11900.t2;g11900.t1;g11900.t3	TRUE	FALSE	FALSE	TRUE	FALSE	TRUE	TRUE	TRUE	FALSE	FALSE
Mnat_05269	g11895.t3;g11895.t4;g11895.t2;g11895.t1	TRUE	FALSE	FALSE	TRUE	TRUE	FALSE	FALSE	FALSE	TRUE	TRUE
Mnat_05270	g11894.t1	TRUE	TRUE	TRUE	TRUE	TRUE	FALSE	FALSE	FALSE	FALSE	TRUE
Mnat_05271	g11893.t1	TRUE	TRUE	TRUE	TRUE	TRUE	TRUE	FALSE	FALSE	TRUE	TRUE
Mnat_05273	g11891.t1	TRUE	TRUE	TRUE	TRUE	TRUE	FALSE	FALSE	FALSE	TRUE	TRUE
Mnat_05275	g11889.t1	TRUE	TRUE	TRUE	TRUE	TRUE	FALSE	FALSE	FALSE	TRUE	TRUE
Mnat_05279	g3368.t1	TRUE	FALSE	FALSE	FALSE	FALSE	TRUE	FALSE	TRUE	FALSE	FALSE
Mnat_05280	g16991.t1	TRUE	TRUE	TRUE	TRUE	TRUE	TRUE	FALSE	FALSE	TRUE	TRUE
Mnat_05281	g7427.t1	TRUE	FALSE	FALSE	FALSE	TRUE	FALSE	FALSE	FALSE	TRUE	TRUE
Mnat_05287	g16997.t1	TRUE	TRUE	TRUE	TRUE	TRUE	FALSE	FALSE	FALSE	FALSE	TRUE
Mnat_05290	g16998.t1	TRUE	TRUE	TRUE	TRUE	TRUE	FALSE	FALSE	FALSE	TRUE	FALSE
Mnat_05294	g17002.t1	TRUE	TRUE	TRUE	TRUE	FALSE	FALSE	TRUE	FALSE	FALSE	FALSE
Mnat_05295	g17003.t2;g17003.t3;g17003.t1	TRUE	FALSE	FALSE	TRUE	FALSE	FALSE	FALSE	FALSE	FALSE	FALSE
Mnat_05297	g17005.t1	TRUE	TRUE	TRUE	TRUE	FALSE	FALSE	TRUE	FALSE	FALSE	FALSE
Mnat_05299	g17008.t1	TRUE	TRUE	TRUE	TRUE	TRUE	FALSE	FALSE	FALSE	TRUE	FALSE
Mnat_05301	g17009.t4;g17009.t3;g17009.t2;g17009.t1;g17009.t5;g17009.t6	TRUE	FALSE	FALSE	TRUE	FALSE	TRUE	TRUE	TRUE	FALSE	FALSE
Mnat_05313	g10486.t1	TRUE	TRUE	TRUE	TRUE	FALSE	FALSE	TRUE	FALSE	FALSE	FALSE
Mnat_05319	g10473.t1	TRUE	TRUE	TRUE	TRUE	FALSE	FALSE	TRUE	FALSE	FALSE	FALSE
Mnat_05320	g10472.t1	TRUE	TRUE	TRUE	TRUE	FALSE	FALSE	TRUE	FALSE	FALSE	FALSE
Mnat_05322	g10471.t2	TRUE	TRUE	TRUE	TRUE	FALSE	FALSE	TRUE	FALSE	FALSE	FALSE
Mnat_05327	g23179.t1	TRUE	FALSE	FALSE	FALSE	FALSE	FALSE	TRUE	FALSE	FALSE	FALSE
Mnat_05330	g10465.t1;g10467.t1;g10463.t1	TRUE	FALSE	FALSE	FALSE	TRUE	FALSE	FALSE	FALSE	TRUE	TRUE
Mnat_05331	g10465.t1;g10467.t1;g10463.t1	TRUE	FALSE	FALSE	FALSE	TRUE	TRUE	FALSE	FALSE	FALSE	TRUE
Mnat_05333	g16737.t1;g16736.t1;g16735.t1	TRUE	FALSE	FALSE	FALSE	FALSE	FALSE	TRUE	FALSE	FALSE	FALSE
Mnat_05334	g16737.t1;g16736.t1;g16735.t1	TRUE	FALSE	FALSE	FALSE	TRUE	FALSE	FALSE	FALSE	TRUE	TRUE
Mnat_05335	g22861.t1	TRUE	FALSE	FALSE	FALSE	FALSE	FALSE	TRUE	FALSE	FALSE	FALSE
Mnat_05338	g16727.t2	TRUE	TRUE	TRUE	TRUE	FALSE	FALSE	TRUE	FALSE	FALSE	FALSE
Mnat_05339	g11446.t3;g11446.t1	TRUE	FALSE	FALSE	TRUE	FALSE	FALSE	TRUE	FALSE	FALSE	FALSE
Mnat_05345	g11437.t1;g11437.t2	TRUE	FALSE	FALSE	TRUE	TRUE	FALSE	FALSE	FALSE	TRUE	TRUE
Mnat_05347	g11433.t1	TRUE	TRUE	TRUE	TRUE	FALSE	FALSE	FALSE	FALSE	FALSE	FALSE
Mnat_05348	g11431.t1	TRUE	TRUE	TRUE	TRUE	FALSE	FALSE	TRUE	FALSE	FALSE	FALSE
Mnat_05349	g11430.t1	TRUE	TRUE	TRUE	TRUE	TRUE	TRUE	FALSE	FALSE	TRUE	TRUE
Mnat_05351	g11427.t1;g11427.t2	TRUE	FALSE	FALSE	TRUE	TRUE	FALSE	FALSE	FALSE	TRUE	TRUE
Mnat_05352	g11426.t1	TRUE	TRUE	TRUE	TRUE	TRUE	FALSE	FALSE	FALSE	TRUE	TRUE
Mnat_05354	g11424.t1	TRUE	TRUE	TRUE	TRUE	TRUE	FALSE	FALSE	FALSE	FALSE	TRUE
Mnat_05360	g14598.t1	TRUE	TRUE	TRUE	TRUE	TRUE	FALSE	FALSE	FALSE	TRUE	TRUE
Mnat_05361	g14597.t2	TRUE	TRUE	TRUE	TRUE	TRUE	FALSE	FALSE	FALSE	TRUE	TRUE
Mnat_05362	g14596.t1	TRUE	TRUE	TRUE	TRUE	FALSE	FALSE	TRUE	FALSE	FALSE	FALSE
Mnat_05366	g10259.t1	TRUE	FALSE	FALSE	FALSE	TRUE	TRUE	FALSE	FALSE	TRUE	TRUE
Mnat_05367	g14588.t1;g14588.t2	TRUE	FALSE	FALSE	TRUE	TRUE	FALSE	FALSE	FALSE	TRUE	TRUE
Mnat_05371	g867.t1;g868.t2;g868.t1	TRUE	FALSE	FALSE	FALSE	FALSE	FALSE	TRUE	FALSE	FALSE	FALSE
Mnat_05372	g19575.t1	TRUE	TRUE	TRUE	TRUE	FALSE	TRUE	TRUE	TRUE	FALSE	FALSE
Mnat_05375	g19574.t1	TRUE	TRUE	TRUE	TRUE	TRUE	FALSE	FALSE	FALSE	TRUE	TRUE
Mnat_05377	g9475.t1;g9472.t1	TRUE	FALSE	FALSE	TRUE	TRUE	FALSE	FALSE	FALSE	FALSE	TRUE
Mnat_05383	g19566.t1	TRUE	TRUE	TRUE	TRUE	TRUE	FALSE	FALSE	FALSE	FALSE	TRUE
Mnat_05386	g19564.t1	TRUE	TRUE	TRUE	TRUE	FALSE	FALSE	TRUE	FALSE	FALSE	FALSE
Mnat_05393	g3368.t1	TRUE	FALSE	FALSE	FALSE	FALSE	TRUE	TRUE	TRUE	FALSE	FALSE
Mnat_05396	g1601.t2;g1601.t1	TRUE	FALSE	FALSE	TRUE	TRUE	FALSE	FALSE	FALSE	FALSE	TRUE
Mnat_05397	g1599.t1	TRUE	TRUE	TRUE	TRUE	TRUE	FALSE	FALSE	FALSE	TRUE	TRUE
Mnat_05402	g1591.t1	TRUE	FALSE	TRUE	FALSE	TRUE	FALSE	FALSE	FALSE	TRUE	TRUE
Mnat_05404	g1593.t1	TRUE	TRUE	TRUE	TRUE	TRUE	TRUE	FALSE	FALSE	FALSE	TRUE
Mnat_05406	g1591.t1	TRUE	FALSE	FALSE	FALSE	TRUE	FALSE	TRUE	FALSE	TRUE	FALSE
Mnat_05408	g1589.t1	TRUE	TRUE	TRUE	TRUE	FALSE	TRUE	FALSE	TRUE	FALSE	FALSE
Mnat_05414	g13800.t1	TRUE	FALSE	FALSE	FALSE	FALSE	FALSE	TRUE	FALSE	FALSE	FALSE
Mnat_05421	g1566.t1	TRUE	TRUE	TRUE	TRUE	TRUE	FALSE	TRUE	FALSE	TRUE	FALSE
Mnat_05429	g5082.t1	TRUE	TRUE	TRUE	TRUE	TRUE	FALSE	FALSE	FALSE	TRUE	TRUE
Mnat_05430	g5082.t3	TRUE	TRUE	TRUE	TRUE	TRUE	FALSE	FALSE	FALSE	TRUE	TRUE
Mnat_05444	g5075.t1	TRUE	TRUE	TRUE	TRUE	FALSE	TRUE	TRUE	TRUE	FALSE	FALSE
Mnat_05460	g5069.t1	TRUE	FALSE	TRUE	FALSE	FALSE	FALSE	TRUE	FALSE	FALSE	FALSE
Mnat_05462	g5067.t1	TRUE	FALSE	FALSE	FALSE	TRUE	TRUE	FALSE	FALSE	FALSE	TRUE
Mnat_05468	g5061.t1;g5061.t3;g5061.t2	TRUE	FALSE	FALSE	TRUE	FALSE	TRUE	TRUE	TRUE	FALSE	FALSE
Mnat_05471	g11392.t1;g11392.t2	TRUE	FALSE	FALSE	TRUE	FALSE	TRUE	TRUE	TRUE	FALSE	FALSE
Mnat_05473	g11387.t1;g11387.t2	TRUE	FALSE	FALSE	TRUE	FALSE	FALSE	TRUE	FALSE	FALSE	FALSE
Mnat_05475	g11385.t3;g11385.t1;g11385.t2	TRUE	FALSE	FALSE	TRUE	TRUE	FALSE	TRUE	FALSE	TRUE	FALSE
Mnat_05476	g11383.t1	TRUE	TRUE	TRUE	TRUE	TRUE	FALSE	FALSE	FALSE	TRUE	TRUE
Mnat_05479	g7496.t1	TRUE	TRUE	TRUE	TRUE	FALSE	FALSE	TRUE	FALSE	FALSE	FALSE
Mnat_05481	g7495.t1	TRUE	TRUE	TRUE	TRUE	FALSE	FALSE	TRUE	FALSE	FALSE	FALSE
Mnat_05487	g7486.t1;g7487.t1;g7485.t1	TRUE	FALSE	FALSE	TRUE	FALSE	FALSE	TRUE	FALSE	FALSE	FALSE
Mnat_05493	g7479.t1	TRUE	FALSE	FALSE	FALSE	FALSE	FALSE	TRUE	FALSE	FALSE	FALSE
Mnat_05494	g7479.t1	TRUE	FALSE	TRUE	FALSE	FALSE	FALSE	TRUE	FALSE	FALSE	FALSE
Mnat_05495	g7478.t1	TRUE	TRUE	TRUE	TRUE	FALSE	FALSE	TRUE	FALSE	FALSE	FALSE
Mnat_05497	g2210.t1	TRUE	FALSE	FALSE	FALSE	FALSE	TRUE	TRUE	TRUE	FALSE	FALSE
Mnat_05499	g7475.t1	TRUE	TRUE	TRUE	TRUE	FALSE	TRUE	TRUE	TRUE	FALSE	FALSE
Mnat_05504	g7472.t1	TRUE	TRUE	TRUE	TRUE	FALSE	TRUE	TRUE	TRUE	FALSE	FALSE
Mnat_05508	g7467.t1	TRUE	TRUE	TRUE	TRUE	FALSE	FALSE	TRUE	FALSE	FALSE	FALSE
Mnat_05509	g7466.t1	TRUE	TRUE	TRUE	TRUE	TRUE	TRUE	FALSE	FALSE	TRUE	TRUE
Mnat_05513	g23158.t1;g23156.t1;g23157.t1	TRUE	FALSE	FALSE	FALSE	FALSE	FALSE	TRUE	FALSE	FALSE	FALSE
Mnat_05517	g23147.t2;g23147.t3;g23147.t1	TRUE	FALSE	FALSE	TRUE	TRUE	FALSE	FALSE	FALSE	TRUE	TRUE
Mnat_05521	g23144.t1	TRUE	TRUE	TRUE	TRUE	FALSE	FALSE	TRUE	FALSE	FALSE	FALSE
Mnat_05523	g23143.t1	TRUE	TRUE	TRUE	TRUE	TRUE	FALSE	FALSE	FALSE	TRUE	TRUE
Mnat_05526	g23141.t1	TRUE	TRUE	TRUE	TRUE	FALSE	FALSE	TRUE	FALSE	FALSE	FALSE
Mnat_05527	g23139.t1	TRUE	TRUE	TRUE	TRUE	FALSE	FALSE	TRUE	FALSE	FALSE	FALSE
Mnat_05528	g23136.t1	TRUE	TRUE	TRUE	TRUE	TRUE	FALSE	FALSE	FALSE	TRUE	TRUE
Mnat_05529	g16667.t1	TRUE	FALSE	TRUE	FALSE	FALSE	FALSE	TRUE	FALSE	FALSE	FALSE
Mnat_05530	g23132.t1	TRUE	TRUE	TRUE	TRUE	FALSE	TRUE	TRUE	TRUE	FALSE	FALSE
Mnat_05534	g3154.t2;g3154.t1	TRUE	FALSE	FALSE	TRUE	TRUE	TRUE	FALSE	FALSE	TRUE	TRUE
Mnat_05536	g3153.t1	TRUE	TRUE	TRUE	TRUE	TRUE	FALSE	FALSE	FALSE	FALSE	TRUE
Mnat_05539	g21458.t1;g19096.t1	TRUE	FALSE	FALSE	FALSE	FALSE	FALSE	TRUE	FALSE	FALSE	FALSE
Mnat_05547	g3149.t2;g3149.t1	TRUE	FALSE	FALSE	TRUE	TRUE	FALSE	FALSE	FALSE	TRUE	TRUE
Mnat_05556	g7078.t1	TRUE	FALSE	FALSE	FALSE	FALSE	FALSE	TRUE	FALSE	FALSE	FALSE
Mnat_05558	g3145.t1	TRUE	TRUE	TRUE	TRUE	TRUE	FALSE	FALSE	FALSE	FALSE	TRUE
Mnat_05563	g19515.t1	TRUE	TRUE	TRUE	TRUE	TRUE	FALSE	FALSE	FALSE	FALSE	TRUE
Mnat_05564	g19514.t1;g19514.t2	TRUE	FALSE	FALSE	TRUE	FALSE	FALSE	TRUE	FALSE	FALSE	FALSE
Mnat_05568	g10686.t2;g10686.t1	TRUE	FALSE	FALSE	TRUE	FALSE	FALSE	TRUE	FALSE	FALSE	FALSE
Mnat_05573	g10690.t1	TRUE	TRUE	TRUE	TRUE	TRUE	TRUE	FALSE	FALSE	TRUE	TRUE
Mnat_05575	g10692.t1;g10692.t2;g10692.t3	TRUE	FALSE	FALSE	TRUE	TRUE	TRUE	FALSE	FALSE	TRUE	TRUE
Mnat_05577	g10693.t2;g10693.t1	TRUE	FALSE	FALSE	TRUE	TRUE	FALSE	FALSE	FALSE	TRUE	TRUE
Mnat_05580	g10696.t1	TRUE	TRUE	TRUE	TRUE	FALSE	FALSE	TRUE	FALSE	FALSE	FALSE
Mnat_05582	g10698.t1	TRUE	TRUE	TRUE	TRUE	TRUE	FALSE	FALSE	FALSE	TRUE	TRUE
Mnat_05585	g10700.t2	TRUE	TRUE	TRUE	TRUE	TRUE	FALSE	FALSE	FALSE	FALSE	TRUE
Mnat_05587	g10701.t1;g10701.t2	TRUE	FALSE	FALSE	TRUE	FALSE	FALSE	TRUE	FALSE	FALSE	FALSE
Mnat_05589	g10704.t1	TRUE	TRUE	TRUE	TRUE	FALSE	FALSE	TRUE	FALSE	FALSE	FALSE
Mnat_05590	g899.t1	TRUE	TRUE	TRUE	TRUE	FALSE	FALSE	TRUE	FALSE	FALSE	FALSE
Mnat_05592	g10707.t1	TRUE	TRUE	TRUE	TRUE	FALSE	FALSE	TRUE	FALSE	FALSE	FALSE
Mnat_05593	g10708.t1	TRUE	TRUE	TRUE	TRUE	TRUE	TRUE	FALSE	FALSE	TRUE	TRUE
Mnat_05595	g10709.t1;g10709.t2	TRUE	FALSE	FALSE	FALSE	TRUE	TRUE	FALSE	FALSE	TRUE	TRUE
Mnat_05599	g10712.t1	TRUE	TRUE	TRUE	TRUE	TRUE	FALSE	FALSE	FALSE	TRUE	TRUE
Mnat_05600	g10713.t1	TRUE	TRUE	TRUE	TRUE	TRUE	FALSE	FALSE	FALSE	FALSE	TRUE
Mnat_05601	g10715.t1	TRUE	TRUE	TRUE	TRUE	FALSE	FALSE	TRUE	FALSE	FALSE	FALSE
Mnat_05602	g10716.t2	TRUE	TRUE	TRUE	TRUE	TRUE	FALSE	FALSE	FALSE	FALSE	TRUE
Mnat_05607	g20491.t1	TRUE	FALSE	FALSE	FALSE	FALSE	TRUE	TRUE	TRUE	FALSE	FALSE
Mnat_05612	g10728.t2;g10728.t1	TRUE	FALSE	FALSE	TRUE	TRUE	FALSE	FALSE	FALSE	TRUE	TRUE
Mnat_05614	g10729.t1	TRUE	TRUE	TRUE	TRUE	FALSE	FALSE	TRUE	FALSE	FALSE	FALSE
Mnat_05615	g10731.t1	TRUE	TRUE	TRUE	TRUE	TRUE	TRUE	FALSE	FALSE	FALSE	TRUE
Mnat_05617	g10734.t1	TRUE	TRUE	TRUE	TRUE	FALSE	TRUE	TRUE	TRUE	FALSE	FALSE
Mnat_05619	g10735.t2	TRUE	TRUE	TRUE	TRUE	FALSE	FALSE	TRUE	FALSE	FALSE	FALSE
Mnat_05620	g10736.t1	TRUE	TRUE	TRUE	TRUE	TRUE	FALSE	FALSE	FALSE	TRUE	TRUE
Mnat_05624	g10740.t1	TRUE	TRUE	TRUE	TRUE	FALSE	TRUE	TRUE	TRUE	FALSE	FALSE
Mnat_05625	g10742.t1;g10742.t3;g10742.t2	TRUE	FALSE	FALSE	TRUE	FALSE	TRUE	TRUE	TRUE	FALSE	FALSE
Mnat_05627	g10744.t1	TRUE	FALSE	FALSE	FALSE	FALSE	FALSE	TRUE	FALSE	FALSE	FALSE
Mnat_05630	g10749.t1	TRUE	TRUE	TRUE	TRUE	FALSE	FALSE	TRUE	FALSE	FALSE	FALSE
[truncated: 4,302 more rows]

## Sheet: S10
Table S10: Gene differential expression categories in C.secundus
# Derived from Lin et al. (2021) doi:10.1038/s42003-021-01892-x
GeneID	worker_biased	queen_biased
GeneID:111871994	TRUE	FALSE
GeneID:111872027	TRUE	FALSE
GeneID:111872041	TRUE	FALSE
GeneID:111872028	TRUE	FALSE
GeneID:111872033	FALSE	TRUE
GeneID:111872048	TRUE	FALSE
GeneID:111872053	TRUE	FALSE
GeneID:111872058	TRUE	FALSE
GeneID:111872080	TRUE	FALSE
GeneID:111872083	FALSE	TRUE
GeneID:111872094	TRUE	FALSE
GeneID:111872100	TRUE	FALSE
GeneID:111872122	TRUE	FALSE
GeneID:111872141	FALSE	TRUE
GeneID:111872139	FALSE	TRUE
GeneID:111872149	FALSE	TRUE
GeneID:111872157	TRUE	FALSE
GeneID:111872162	FALSE	TRUE
GeneID:111872188	TRUE	FALSE
GeneID:111872197	TRUE	FALSE
GeneID:111872206	FALSE	TRUE
GeneID:111872203	FALSE	TRUE
GeneID:111872230	TRUE	FALSE
GeneID:111872248	TRUE	FALSE
GeneID:111872268	TRUE	FALSE
GeneID:111872269	FALSE	TRUE
GeneID:111872296	TRUE	FALSE
GeneID:111872308	FALSE	TRUE
GeneID:111872288	TRUE	FALSE
GeneID:111872281	FALSE	TRUE
GeneID:111872306	TRUE	FALSE
GeneID:111872313	FALSE	TRUE
GeneID:111872318	FALSE	TRUE
GeneID:111872319	FALSE	TRUE
GeneID:111872357	TRUE	FALSE
GeneID:111872406	TRUE	FALSE
GeneID:111872434	FALSE	TRUE
GeneID:111872401	FALSE	TRUE
GeneID:111872387	FALSE	TRUE
GeneID:111872382	FALSE	TRUE
GeneID:111872411	FALSE	TRUE
GeneID:111872379	TRUE	FALSE
GeneID:111872471	TRUE	FALSE
GeneID:111872479	FALSE	TRUE
GeneID:111872485	TRUE	FALSE
GeneID:111872532	TRUE	FALSE
GeneID:117282955	FALSE	TRUE
GeneID:111872517	TRUE	FALSE
GeneID:111872508	TRUE	FALSE
GeneID:111872557	FALSE	TRUE
GeneID:111872563	TRUE	FALSE
GeneID:111872567	FALSE	TRUE
GeneID:111872601	TRUE	FALSE
GeneID:111872614	TRUE	FALSE
GeneID:111872612	TRUE	FALSE
GeneID:111872637	TRUE	FALSE
GeneID:111872658	TRUE	FALSE
GeneID:111872668	TRUE	FALSE
GeneID:111872672	TRUE	FALSE
GeneID:111872693	FALSE	TRUE
GeneID:111872694	TRUE	FALSE
GeneID:111872686	FALSE	TRUE
GeneID:111872697	TRUE	FALSE
GeneID:111872711	TRUE	FALSE
GeneID:111872718	TRUE	FALSE
GeneID:111872727	TRUE	FALSE
GeneID:111872742	TRUE	FALSE
GeneID:111872746	TRUE	FALSE
GeneID:111872762	TRUE	FALSE
GeneID:111872780	TRUE	FALSE
GeneID:111866351	TRUE	FALSE
GeneID:111866361	TRUE	FALSE
GeneID:111866367	TRUE	FALSE
GeneID:111866360	FALSE	TRUE
GeneID:111866424	TRUE	FALSE
GeneID:111866438	TRUE	FALSE
GeneID:111866428	TRUE	FALSE
GeneID:111866441	TRUE	FALSE
GeneID:111866442	TRUE	FALSE
GeneID:111866447	FALSE	TRUE
GeneID:111866461	FALSE	TRUE
GeneID:111866465	FALSE	TRUE
GeneID:111866462	FALSE	TRUE
GeneID:111866464	TRUE	FALSE
GeneID:111866503	FALSE	TRUE
GeneID:111866507	TRUE	FALSE
GeneID:111866537	FALSE	TRUE
GeneID:111866545	FALSE	TRUE
GeneID:111866563	TRUE	FALSE
GeneID:111866553	FALSE	TRUE
GeneID:111866576	TRUE	FALSE
GeneID:111866586	TRUE	FALSE
GeneID:111866589	TRUE	FALSE
GeneID:111866584	TRUE	FALSE
GeneID:111866585	TRUE	FALSE
GeneID:111866591	TRUE	FALSE
GeneID:111866602	TRUE	FALSE
GeneID:111866605	TRUE	FALSE
GeneID:111866615	TRUE	FALSE
GeneID:111866616	TRUE	FALSE
GeneID:111866632	FALSE	TRUE
GeneID:111866634	FALSE	TRUE
GeneID:111866638	FALSE	TRUE
GeneID:111866667	FALSE	TRUE
GeneID:111866670	TRUE	FALSE
GeneID:111866696	TRUE	FALSE
GeneID:111866716	FALSE	TRUE
GeneID:111866680	FALSE	TRUE
GeneID:111866703	FALSE	TRUE
GeneID:111866755	FALSE	TRUE
GeneID:111866739	TRUE	FALSE
GeneID:111866745	FALSE	TRUE
GeneID:111866731	FALSE	TRUE
GeneID:111866737	TRUE	FALSE
GeneID:111866764	FALSE	TRUE
GeneID:111866817	TRUE	FALSE
GeneID:111866811	FALSE	TRUE
GeneID:111866803	FALSE	TRUE
GeneID:111866839	TRUE	FALSE
GeneID:111866837	FALSE	TRUE
GeneID:111866838	FALSE	TRUE
GeneID:111866835	FALSE	TRUE
GeneID:111866883	TRUE	FALSE
GeneID:111866869	TRUE	FALSE
GeneID:111866940	TRUE	FALSE
GeneID:111866927	FALSE	TRUE
GeneID:111866929	FALSE	TRUE
GeneID:111866943	TRUE	FALSE
GeneID:111866941	TRUE	FALSE
GeneID:111866939	TRUE	FALSE
GeneID:111866947	TRUE	FALSE
GeneID:111866922	TRUE	FALSE
GeneID:111866931	FALSE	TRUE
GeneID:111866932	TRUE	FALSE
GeneID:111866919	FALSE	TRUE
GeneID:111866957	TRUE	FALSE
GeneID:111866955	TRUE	FALSE
GeneID:111866971	TRUE	FALSE
GeneID:111866970	TRUE	FALSE
GeneID:111866966	TRUE	FALSE
GeneID:111867012	FALSE	TRUE
GeneID:111867036	TRUE	FALSE
GeneID:111867050	TRUE	FALSE
GeneID:111867047	TRUE	FALSE
GeneID:111867070	FALSE	TRUE
GeneID:111867066	TRUE	FALSE
GeneID:111867057	FALSE	TRUE
GeneID:111867091	TRUE	FALSE
GeneID:111867081	FALSE	TRUE
GeneID:111867115	FALSE	TRUE
GeneID:111867114	TRUE	FALSE
GeneID:111867125	TRUE	FALSE
GeneID:111867126	TRUE	FALSE
GeneID:111867124	TRUE	FALSE
GeneID:111867133	TRUE	FALSE
GeneID:111867136	TRUE	FALSE
GeneID:111867142	TRUE	FALSE
GeneID:111867153	TRUE	FALSE
GeneID:111867152	TRUE	FALSE
GeneID:111867159	TRUE	FALSE
GeneID:111867158	FALSE	TRUE
GeneID:111867167	FALSE	TRUE
GeneID:111867183	FALSE	TRUE
GeneID:111867196	TRUE	FALSE
GeneID:111867218	TRUE	FALSE
GeneID:111867199	FALSE	TRUE
GeneID:111867249	TRUE	FALSE
GeneID:111867248	FALSE	TRUE
GeneID:111867255	FALSE	TRUE
GeneID:111867271	TRUE	FALSE
GeneID:111867318	FALSE	TRUE
GeneID:111867321	FALSE	TRUE
GeneID:111867323	FALSE	TRUE
GeneID:111867348	TRUE	FALSE
GeneID:111867366	TRUE	FALSE
GeneID:111867388	FALSE	TRUE
GeneID:111867406	FALSE	TRUE
GeneID:111867444	TRUE	FALSE
GeneID:111867442	TRUE	FALSE
GeneID:111867451	FALSE	TRUE
GeneID:111867508	FALSE	TRUE
GeneID:111867502	TRUE	FALSE
GeneID:111867527	TRUE	FALSE
GeneID:111867533	FALSE	TRUE
GeneID:111867534	FALSE	TRUE
GeneID:111867547	TRUE	FALSE
GeneID:111867590	TRUE	FALSE
GeneID:111867579	TRUE	FALSE
GeneID:111867586	TRUE	FALSE
GeneID:111867594	TRUE	FALSE
GeneID:111867624	FALSE	TRUE
GeneID:111867597	TRUE	FALSE
GeneID:111867620	FALSE	TRUE
GeneID:111867639	FALSE	TRUE
GeneID:111867631	TRUE	FALSE
GeneID:111867610	FALSE	TRUE
GeneID:111867668	TRUE	FALSE
GeneID:111867648	TRUE	FALSE
GeneID:111867650	TRUE	FALSE
GeneID:111867658	FALSE	TRUE
GeneID:111867675	TRUE	FALSE
GeneID:111867687	FALSE	TRUE
GeneID:111867721	FALSE	TRUE
GeneID:111867734	TRUE	FALSE
GeneID:111867736	TRUE	FALSE
GeneID:111867761	FALSE	TRUE
GeneID:111867759	FALSE	TRUE
GeneID:111867758	TRUE	FALSE
GeneID:111867769	FALSE	TRUE
GeneID:111867763	FALSE	TRUE
GeneID:111867783	TRUE	FALSE
GeneID:111867798	TRUE	FALSE
GeneID:111867800	TRUE	FALSE
GeneID:111867815	TRUE	FALSE
GeneID:111867825	FALSE	TRUE
GeneID:111867854	TRUE	FALSE
GeneID:111867867	TRUE	FALSE
GeneID:111867884	TRUE	FALSE
GeneID:111867885	FALSE	TRUE
GeneID:111867876	TRUE	FALSE
GeneID:111867877	TRUE	FALSE
GeneID:111867887	TRUE	FALSE
GeneID:111867878	TRUE	FALSE
GeneID:111867896	TRUE	FALSE
GeneID:111867928	FALSE	TRUE
GeneID:111867927	FALSE	TRUE
GeneID:111867939	FALSE	TRUE
GeneID:111867961	TRUE	FALSE
GeneID:111867973	TRUE	FALSE
GeneID:111868012	TRUE	FALSE
GeneID:111868003	FALSE	TRUE
GeneID:111868020	TRUE	FALSE
GeneID:111868029	FALSE	TRUE
GeneID:111868046	TRUE	FALSE
GeneID:111868055	FALSE	TRUE
GeneID:111868057	TRUE	FALSE
GeneID:111868072	FALSE	TRUE
GeneID:111868071	FALSE	TRUE
GeneID:111868080	TRUE	FALSE
GeneID:111868082	TRUE	FALSE
GeneID:111868073	TRUE	FALSE
GeneID:111868094	TRUE	FALSE
GeneID:111868095	TRUE	FALSE
GeneID:111868109	TRUE	FALSE
GeneID:111868131	TRUE	FALSE
GeneID:111868148	FALSE	TRUE
GeneID:111868188	TRUE	FALSE
GeneID:111868180	TRUE	FALSE
GeneID:111868185	FALSE	TRUE
GeneID:111868206	FALSE	TRUE
GeneID:111868195	TRUE	FALSE
GeneID:111868220	FALSE	TRUE
GeneID:111868237	TRUE	FALSE
GeneID:111868248	TRUE	FALSE
GeneID:111868256	FALSE	TRUE
GeneID:111868265	TRUE	FALSE
GeneID:111868279	FALSE	TRUE
GeneID:111868302	TRUE	FALSE
GeneID:111868358	TRUE	FALSE
GeneID:111868362	TRUE	FALSE
GeneID:111868379	FALSE	TRUE
GeneID:111868400	TRUE	FALSE
GeneID:111868394	TRUE	FALSE
GeneID:111868455	TRUE	FALSE
GeneID:111868435	TRUE	FALSE
GeneID:111868449	TRUE	FALSE
GeneID:111868426	FALSE	TRUE
GeneID:111868414	TRUE	FALSE
GeneID:111868417	TRUE	FALSE
GeneID:111868446	TRUE	FALSE
GeneID:111868465	TRUE	FALSE
GeneID:111868488	FALSE	TRUE
GeneID:111868484	TRUE	FALSE
GeneID:111868479	TRUE	FALSE
GeneID:111868505	FALSE	TRUE
GeneID:111868497	TRUE	FALSE
GeneID:111868568	FALSE	TRUE
GeneID:111868565	TRUE	FALSE
GeneID:111868544	TRUE	FALSE
GeneID:111868573	TRUE	FALSE
GeneID:111868576	FALSE	TRUE
GeneID:111868611	FALSE	TRUE
GeneID:111868622	FALSE	TRUE
GeneID:111868634	TRUE	FALSE
GeneID:111868654	TRUE	FALSE
GeneID:111868629	TRUE	FALSE
GeneID:111868628	TRUE	FALSE
GeneID:111868681	TRUE	FALSE
GeneID:111868690	TRUE	FALSE
GeneID:111868692	FALSE	TRUE
GeneID:111868736	FALSE	TRUE
GeneID:111863166	TRUE	FALSE
GeneID:111863179	TRUE	FALSE
GeneID:111863180	TRUE	FALSE
GeneID:111863187	TRUE	FALSE
GeneID:111863183	TRUE	FALSE
GeneID:111863193	TRUE	FALSE
GeneID:111863278	FALSE	TRUE
GeneID:111863245	FALSE	TRUE
GeneID:111863247	TRUE	FALSE
GeneID:111863271	FALSE	TRUE
GeneID:111863257	FALSE	TRUE
GeneID:111863304	TRUE	FALSE
GeneID:111863316	FALSE	TRUE
GeneID:111863330	TRUE	FALSE
GeneID:111863321	TRUE	FALSE
GeneID:111863346	TRUE	FALSE
GeneID:111863352	TRUE	FALSE
GeneID:111863358	TRUE	FALSE
GeneID:111863385	TRUE	FALSE
GeneID:111863383	TRUE	FALSE
GeneID:111863369	FALSE	TRUE
GeneID:111863367	TRUE	FALSE
GeneID:111863394	FALSE	TRUE
GeneID:111863418	TRUE	FALSE
GeneID:111863429	TRUE	FALSE
GeneID:111863444	TRUE	FALSE
GeneID:111863498	FALSE	TRUE
GeneID:111863529	TRUE	FALSE
GeneID:111863537	FALSE	TRUE
GeneID:111863545	TRUE	FALSE
GeneID:111863564	TRUE	FALSE
GeneID:111863575	TRUE	FALSE
GeneID:111863540	TRUE	FALSE
GeneID:111863570	FALSE	TRUE
GeneID:111863593	FALSE	TRUE
GeneID:111863594	FALSE	TRUE
GeneID:111863627	TRUE	FALSE
GeneID:111863625	TRUE	FALSE
GeneID:111863631	FALSE	TRUE
GeneID:111863661	TRUE	FALSE
GeneID:111863663	FALSE	TRUE
GeneID:111863674	TRUE	FALSE
GeneID:111863675	TRUE	FALSE
GeneID:111863668	TRUE	FALSE
GeneID:111863658	TRUE	FALSE
GeneID:111863681	FALSE	TRUE
GeneID:111863686	TRUE	FALSE
GeneID:111863693	FALSE	TRUE
GeneID:111863715	TRUE	FALSE
GeneID:111863720	FALSE	TRUE
GeneID:111863724	TRUE	FALSE
GeneID:111863728	TRUE	FALSE
GeneID:111863734	FALSE	TRUE
GeneID:111863735	FALSE	TRUE
GeneID:111863770	TRUE	FALSE
GeneID:111863771	TRUE	FALSE
GeneID:111863759	FALSE	TRUE
GeneID:111863749	TRUE	FALSE
GeneID:111863789	TRUE	FALSE
GeneID:111863806	TRUE	FALSE
GeneID:111863822	TRUE	FALSE
GeneID:111863817	TRUE	FALSE
GeneID:111863821	TRUE	FALSE
GeneID:111863824	TRUE	FALSE
GeneID:111863835	TRUE	FALSE
GeneID:111863859	TRUE	FALSE
GeneID:111863853	TRUE	FALSE
GeneID:111863837	TRUE	FALSE
GeneID:111863855	FALSE	TRUE
GeneID:111863847	TRUE	FALSE
GeneID:111863860	TRUE	FALSE
GeneID:111863848	TRUE	FALSE
GeneID:111863838	FALSE	TRUE
GeneID:111863903	TRUE	FALSE
GeneID:111863907	TRUE	FALSE
GeneID:111863910	TRUE	FALSE
GeneID:111864751	TRUE	FALSE
GeneID:111864750	TRUE	FALSE
GeneID:111864775	TRUE	FALSE
GeneID:111864785	FALSE	TRUE
GeneID:111864802	FALSE	TRUE
GeneID:117282334	FALSE	TRUE
GeneID:111864810	FALSE	TRUE
GeneID:111864821	TRUE	FALSE
GeneID:111864839	TRUE	FALSE
GeneID:111864845	FALSE	TRUE
GeneID:111864874	TRUE	FALSE
GeneID:111864870	FALSE	TRUE
GeneID:111864860	FALSE	TRUE
GeneID:111864879	TRUE	FALSE
GeneID:111864877	FALSE	TRUE
GeneID:111864893	FALSE	TRUE
GeneID:111864894	TRUE	FALSE
GeneID:111864927	TRUE	FALSE
GeneID:111864926	TRUE	FALSE
GeneID:111864922	TRUE	FALSE
GeneID:111864907	TRUE	FALSE
GeneID:111864925	TRUE	FALSE
GeneID:111864920	FALSE	TRUE
GeneID:111864986	TRUE	FALSE
GeneID:111864963	TRUE	FALSE
GeneID:111865051	TRUE	FALSE
GeneID:111865040	TRUE	FALSE
GeneID:111865066	FALSE	TRUE
GeneID:111865129	TRUE	FALSE
GeneID:111865121	FALSE	TRUE
GeneID:111865146	FALSE	TRUE
GeneID:111865147	FALSE	TRUE
GeneID:111865148	FALSE	TRUE
GeneID:111865141	TRUE	FALSE
GeneID:111865161	TRUE	FALSE
GeneID:111865154	TRUE	FALSE
GeneID:111865194	FALSE	TRUE
GeneID:111865192	FALSE	TRUE
GeneID:111865206	TRUE	FALSE
GeneID:111865202	FALSE	TRUE
GeneID:111865184	TRUE	FALSE
GeneID:111865203	FALSE	TRUE
GeneID:111865244	TRUE	FALSE
GeneID:111865216	FALSE	TRUE
GeneID:111865246	FALSE	TRUE
GeneID:111865218	TRUE	FALSE
GeneID:111865235	TRUE	FALSE
GeneID:111865238	TRUE	FALSE
GeneID:111865236	FALSE	TRUE
GeneID:117282377	TRUE	FALSE
GeneID:111865263	FALSE	TRUE
GeneID:111865270	TRUE	FALSE
GeneID:111865269	TRUE	FALSE
GeneID:111865280	FALSE	TRUE
GeneID:111865311	TRUE	FALSE
GeneID:111865318	FALSE	TRUE
GeneID:111865347	TRUE	FALSE
GeneID:111865338	TRUE	FALSE
GeneID:111865331	FALSE	TRUE
GeneID:111865326	TRUE	FALSE
GeneID:111865352	FALSE	TRUE
GeneID:111865344	FALSE	TRUE
GeneID:111865361	FALSE	TRUE
GeneID:111865380	TRUE	FALSE
GeneID:111865386	TRUE	FALSE
GeneID:111865408	FALSE	TRUE
GeneID:111865399	FALSE	TRUE
GeneID:111865415	TRUE	FALSE
GeneID:111865451	TRUE	FALSE
GeneID:111865452	TRUE	FALSE
GeneID:111865453	FALSE	TRUE
GeneID:111865482	TRUE	FALSE
GeneID:111865472	FALSE	TRUE
GeneID:111865468	FALSE	TRUE
GeneID:111865493	FALSE	TRUE
GeneID:111865467	TRUE	FALSE
GeneID:111865463	TRUE	FALSE
GeneID:111865506	FALSE	TRUE
GeneID:111865507	TRUE	FALSE
GeneID:111865500	TRUE	FALSE
GeneID:117282404	TRUE	FALSE
GeneID:111865521	TRUE	FALSE
GeneID:111874451	TRUE	FALSE
GeneID:111874469	TRUE	FALSE
GeneID:111874462	TRUE	FALSE
GeneID:111874461	FALSE	TRUE
GeneID:111874466	FALSE	TRUE
GeneID:111874480	FALSE	TRUE
GeneID:111874496	TRUE	FALSE
GeneID:111874489	TRUE	FALSE
GeneID:111874490	TRUE	FALSE
GeneID:111874505	FALSE	TRUE
GeneID:111874511	TRUE	FALSE
GeneID:111874515	TRUE	FALSE
GeneID:111874506	TRUE	FALSE
GeneID:111874524	FALSE	TRUE
GeneID:111874554	TRUE	FALSE
GeneID:111874558	TRUE	FALSE
GeneID:111874562	TRUE	FALSE
GeneID:111874561	FALSE	TRUE
GeneID:111874568	FALSE	TRUE
GeneID:111874617	TRUE	FALSE
GeneID:111874620	TRUE	FALSE
GeneID:111874650	TRUE	FALSE
GeneID:111874639	FALSE	TRUE
GeneID:111874673	TRUE	FALSE
GeneID:111874666	TRUE	FALSE
GeneID:111874669	TRUE	FALSE
GeneID:111874684	TRUE	FALSE
GeneID:111874699	FALSE	TRUE
GeneID:111874700	TRUE	FALSE
GeneID:111874722	TRUE	FALSE
GeneID:111874741	FALSE	TRUE
GeneID:111874740	TRUE	FALSE
GeneID:111874754	FALSE	TRUE
GeneID:111874763	FALSE	TRUE
GeneID:111874787	FALSE	TRUE
GeneID:111874782	FALSE	TRUE
GeneID:111874789	FALSE	TRUE
GeneID:111874788	TRUE	FALSE
GeneID:111874792	FALSE	TRUE
GeneID:111874793	FALSE	TRUE
GeneID:111874796	FALSE	TRUE
GeneID:111874826	TRUE	FALSE
GeneID:111874830	FALSE	TRUE
GeneID:111874831	FALSE	TRUE
GeneID:111874832	FALSE	TRUE
GeneID:111874828	FALSE	TRUE
GeneID:111874843	FALSE	TRUE
GeneID:111874876	FALSE	TRUE
GeneID:111874872	TRUE	FALSE
GeneID:111874842	TRUE	FALSE
GeneID:111874883	TRUE	FALSE
GeneID:111874862	TRUE	FALSE
GeneID:111874889	TRUE	FALSE
GeneID:111874900	TRUE	FALSE
GeneID:111874921	FALSE	TRUE
GeneID:111874923	TRUE	FALSE
GeneID:111874947	FALSE	TRUE
GeneID:111874952	TRUE	FALSE
GeneID:111874954	FALSE	TRUE
GeneID:111874961	FALSE	TRUE
GeneID:111874975	FALSE	TRUE
GeneID:111874972	TRUE	FALSE
GeneID:111874971	FALSE	TRUE
GeneID:111874970	TRUE	FALSE
GeneID:111874983	FALSE	TRUE
GeneID:111874985	FALSE	TRUE
GeneID:111874989	FALSE	TRUE
GeneID:111874991	FALSE	TRUE
GeneID:111874998	TRUE	FALSE
GeneID:111875012	FALSE	TRUE
GeneID:111875008	FALSE	TRUE
GeneID:111875028	FALSE	TRUE
GeneID:111875043	TRUE	FALSE
GeneID:111875042	TRUE	FALSE
GeneID:111875046	FALSE	TRUE
GeneID:111875044	FALSE	TRUE
GeneID:111875060	TRUE	FALSE
GeneID:111875061	TRUE	FALSE
GeneID:111875073	FALSE	TRUE
GeneID:111875088	TRUE	FALSE
GeneID:111875103	FALSE	TRUE
GeneID:111875161	FALSE	TRUE
GeneID:111875170	TRUE	FALSE
GeneID:111868741	FALSE	TRUE
GeneID:111868780	FALSE	TRUE
GeneID:111868776	TRUE	FALSE
GeneID:111868806	TRUE	FALSE
GeneID:111868792	FALSE	TRUE
GeneID:111868823	FALSE	TRUE
GeneID:111868809	FALSE	TRUE
GeneID:111868815	TRUE	FALSE
GeneID:111868799	TRUE	FALSE
GeneID:111868820	TRUE	FALSE
GeneID:111868818	TRUE	FALSE
GeneID:111868836	TRUE	FALSE
GeneID:111868865	TRUE	FALSE
GeneID:111868856	TRUE	FALSE
GeneID:111868862	TRUE	FALSE
GeneID:111868871	TRUE	FALSE
GeneID:111868883	FALSE	TRUE
GeneID:111868892	TRUE	FALSE
GeneID:111868911	TRUE	FALSE
GeneID:111868901	FALSE	TRUE
GeneID:111868905	TRUE	FALSE
GeneID:111868927	TRUE	FALSE
GeneID:111868963	TRUE	FALSE
GeneID:111869003	TRUE	FALSE
GeneID:111869027	TRUE	FALSE
GeneID:111869045	FALSE	TRUE
GeneID:111869018	TRUE	FALSE
GeneID:111869011	FALSE	TRUE
GeneID:111869069	TRUE	FALSE
GeneID:111869076	FALSE	TRUE
GeneID:111869079	TRUE	FALSE
GeneID:111869106	FALSE	TRUE
GeneID:111869104	FALSE	TRUE
GeneID:111869135	TRUE	FALSE
GeneID:111869151	TRUE	FALSE
GeneID:111869150	TRUE	FALSE
GeneID:111869159	FALSE	TRUE
GeneID:111869176	FALSE	TRUE
GeneID:111869169	TRUE	FALSE
GeneID:111869190	TRUE	FALSE
GeneID:111869203	TRUE	FALSE
GeneID:111869226	TRUE	FALSE
GeneID:111869210	FALSE	TRUE
GeneID:111869213	FALSE	TRUE
GeneID:111869219	FALSE	TRUE
GeneID:111869205	TRUE	FALSE
GeneID:111869233	TRUE	FALSE
GeneID:111869243	TRUE	FALSE
GeneID:111869251	FALSE	TRUE
GeneID:111869258	FALSE	TRUE
GeneID:111869270	TRUE	FALSE
GeneID:111869267	TRUE	FALSE
GeneID:111869266	FALSE	TRUE
GeneID:111869291	FALSE	TRUE
GeneID:111869277	FALSE	TRUE
GeneID:111869312	TRUE	FALSE
GeneID:111869299	TRUE	FALSE
GeneID:111869323	FALSE	TRUE
GeneID:111869372	TRUE	FALSE
GeneID:111869377	TRUE	FALSE
GeneID:111869349	TRUE	FALSE
GeneID:111869348	TRUE	FALSE
GeneID:111869359	TRUE	FALSE
GeneID:111869365	TRUE	FALSE
GeneID:111869342	TRUE	FALSE
GeneID:111869389	TRUE	FALSE
GeneID:111869354	TRUE	FALSE
GeneID:111869376	FALSE	TRUE
GeneID:111869436	FALSE	TRUE
GeneID:111869400	TRUE	FALSE
GeneID:111869404	FALSE	TRUE
GeneID:111869403	TRUE	FALSE
GeneID:111869414	FALSE	TRUE
GeneID:111869429	FALSE	TRUE
GeneID:111869432	TRUE	FALSE
GeneID:111869423	TRUE	FALSE
GeneID:111869426	FALSE	TRUE
GeneID:111869446	TRUE	FALSE
GeneID:111869455	TRUE	FALSE
GeneID:111869462	FALSE	TRUE
GeneID:111869468	TRUE	FALSE
GeneID:117282713	FALSE	TRUE
GeneID:111869510	FALSE	TRUE
GeneID:111869519	TRUE	FALSE
GeneID:111869512	TRUE	FALSE
GeneID:111869530	FALSE	TRUE
GeneID:111861482	FALSE	TRUE
GeneID:111861506	TRUE	FALSE
GeneID:111861505	TRUE	FALSE
GeneID:111861510	FALSE	TRUE
GeneID:111861531	FALSE	TRUE
GeneID:111861560	TRUE	FALSE
GeneID:111861583	TRUE	FALSE
GeneID:111861591	FALSE	TRUE
GeneID:111861604	FALSE	TRUE
GeneID:111861644	FALSE	TRUE
GeneID:111861663	TRUE	FALSE
GeneID:111861649	TRUE	FALSE
GeneID:111861646	FALSE	TRUE
GeneID:111861662	TRUE	FALSE
GeneID:111861667	FALSE	TRUE
GeneID:111861675	FALSE	TRUE
GeneID:111861674	FALSE	TRUE
GeneID:111861696	TRUE	FALSE
GeneID:111861685	TRUE	FALSE
GeneID:111861708	TRUE	FALSE
GeneID:111861728	TRUE	FALSE
GeneID:111861757	FALSE	TRUE
GeneID:111861781	TRUE	FALSE
GeneID:111861799	TRUE	FALSE
GeneID:111861801	TRUE	FALSE
GeneID:111861803	FALSE	TRUE
GeneID:111861821	FALSE	TRUE
GeneID:111861829	TRUE	FALSE
GeneID:111861841	TRUE	FALSE
GeneID:111861856	TRUE	FALSE
GeneID:111861858	FALSE	TRUE
GeneID:111861862	TRUE	FALSE
GeneID:111861871	FALSE	TRUE
GeneID:111861885	TRUE	FALSE
GeneID:111861898	FALSE	TRUE
GeneID:111861906	FALSE	TRUE
GeneID:111861918	FALSE	TRUE
GeneID:111861914	FALSE	TRUE
GeneID:111862021	TRUE	FALSE
GeneID:111862017	TRUE	FALSE
GeneID:111861943	FALSE	TRUE
GeneID:111861964	TRUE	FALSE
GeneID:111861977	TRUE	FALSE
GeneID:111861948	FALSE	TRUE
GeneID:111861991	TRUE	FALSE
GeneID:111862048	TRUE	FALSE
GeneID:111862052	TRUE	FALSE
GeneID:111862037	TRUE	FALSE
GeneID:111862033	FALSE	TRUE
GeneID:111862079	TRUE	FALSE
GeneID:111862078	TRUE	FALSE
GeneID:111862116	FALSE	TRUE
GeneID:111862105	TRUE	FALSE
GeneID:111862104	TRUE	FALSE
GeneID:111862119	FALSE	TRUE
GeneID:111862108	TRUE	FALSE
GeneID:111862131	FALSE	TRUE
GeneID:111862147	TRUE	FALSE
GeneID:111862133	FALSE	TRUE
GeneID:111862166	FALSE	TRUE
GeneID:111862175	TRUE	FALSE
GeneID:111862191	TRUE	FALSE
GeneID:111862204	TRUE	FALSE
GeneID:111862197	TRUE	FALSE
GeneID:111862210	TRUE	FALSE
GeneID:111862209	TRUE	FALSE
GeneID:111862224	TRUE	FALSE
GeneID:111862230	TRUE	FALSE
GeneID:111862231	TRUE	FALSE
GeneID:111862304	FALSE	TRUE
GeneID:111862287	FALSE	TRUE
GeneID:111867727	TRUE	FALSE
GeneID:111874209	FALSE	TRUE
GeneID:111872005	FALSE	TRUE
GeneID:111861809	TRUE	FALSE
GeneID:111862543	TRUE	FALSE
GeneID:111861743	TRUE	FALSE
GeneID:111867614	FALSE	TRUE
GeneID:111868749	FALSE	TRUE
GeneID:111868294	FALSE	TRUE
GeneID:111874919	TRUE	FALSE
GeneID:111875353	FALSE	TRUE
GeneID:111875631	FALSE	TRUE
GeneID:111861309	TRUE	FALSE
GeneID:111861522	FALSE	TRUE
GeneID:111861443	FALSE	TRUE
GeneID:111861431	FALSE	TRUE
GeneID:111861731	FALSE	TRUE
GeneID:111861721	TRUE	FALSE
GeneID:111861869	TRUE	FALSE
GeneID:111861993	TRUE	FALSE
GeneID:111862022	TRUE	FALSE
GeneID:111862137	TRUE	FALSE
GeneID:111862381	TRUE	FALSE
GeneID:111862443	FALSE	TRUE
GeneID:111862458	TRUE	FALSE
GeneID:111862541	FALSE	TRUE
GeneID:111862849	TRUE	FALSE
GeneID:111862729	TRUE	FALSE
GeneID:111862705	FALSE	TRUE
GeneID:111862813	TRUE	FALSE
GeneID:111862690	TRUE	FALSE
GeneID:111862823	TRUE	FALSE
GeneID:111862877	TRUE	FALSE
GeneID:111863059	FALSE	TRUE
GeneID:111863184	FALSE	TRUE
GeneID:111863318	TRUE	FALSE
GeneID:111863523	TRUE	FALSE
GeneID:111863462	TRUE	FALSE
GeneID:111863528	TRUE	FALSE
GeneID:111863534	TRUE	FALSE
GeneID:111863454	FALSE	TRUE
GeneID:111863442	TRUE	FALSE
GeneID:111863424	TRUE	FALSE
GeneID:111863542	FALSE	TRUE
GeneID:111863490	FALSE	TRUE
GeneID:111863915	TRUE	FALSE
GeneID:111863714	TRUE	FALSE
GeneID:111863747	TRUE	FALSE
GeneID:111863708	TRUE	FALSE
GeneID:111863773	FALSE	TRUE
GeneID:111864046	TRUE	FALSE
GeneID:111864038	FALSE	TRUE
GeneID:111864256	TRUE	FALSE
GeneID:111864428	TRUE	FALSE
GeneID:111864377	FALSE	TRUE
GeneID:111864554	TRUE	FALSE
GeneID:111864994	TRUE	FALSE
GeneID:111864980	TRUE	FALSE
GeneID:111865190	TRUE	FALSE
GeneID:111865215	FALSE	TRUE
GeneID:111865319	TRUE	FALSE
GeneID:111865582	FALSE	TRUE
GeneID:111865665	FALSE	TRUE
GeneID:111865939	TRUE	FALSE
GeneID:111866101	FALSE	TRUE
GeneID:111866443	FALSE	TRUE
GeneID:111871219	FALSE	TRUE
GeneID:111871215	TRUE	FALSE
GeneID:111871200	TRUE	FALSE
GeneID:111871195	FALSE	TRUE
GeneID:111871216	TRUE	FALSE
GeneID:111871222	FALSE	TRUE
GeneID:111871227	TRUE	FALSE
GeneID:111871241	TRUE	FALSE
GeneID:111871272	TRUE	FALSE
GeneID:111871299	FALSE	TRUE
GeneID:111871280	TRUE	FALSE
GeneID:111871289	FALSE	TRUE
GeneID:111871302	TRUE	FALSE
GeneID:111871314	TRUE	FALSE
GeneID:111871313	FALSE	TRUE
GeneID:111871324	TRUE	FALSE
GeneID:111871334	FALSE	TRUE
GeneID:111871343	TRUE	FALSE
GeneID:111871353	TRUE	FALSE
GeneID:111871362	TRUE	FALSE
GeneID:111871360	FALSE	TRUE
GeneID:111871365	TRUE	FALSE
GeneID:111871367	TRUE	FALSE
GeneID:111871381	TRUE	FALSE
GeneID:111871371	TRUE	FALSE
GeneID:111871377	FALSE	TRUE
GeneID:111871388	TRUE	FALSE
GeneID:111871386	FALSE	TRUE
GeneID:111871403	TRUE	FALSE
GeneID:111871397	TRUE	FALSE
GeneID:111871420	TRUE	FALSE
GeneID:111871418	TRUE	FALSE
GeneID:111871414	TRUE	FALSE
GeneID:111871411	TRUE	FALSE
GeneID:111871448	TRUE	FALSE
GeneID:111871450	TRUE	FALSE
GeneID:111871451	TRUE	FALSE
GeneID:111871456	FALSE	TRUE
GeneID:111871475	TRUE	FALSE
GeneID:111871482	TRUE	FALSE
GeneID:111871468	TRUE	FALSE
GeneID:111871471	TRUE	FALSE
GeneID:111871479	TRUE	FALSE
GeneID:111871510	FALSE	TRUE
GeneID:111871522	TRUE	FALSE
GeneID:111871518	TRUE	FALSE
GeneID:111871568	TRUE	FALSE
GeneID:111871571	FALSE	TRUE
GeneID:111871578	FALSE	TRUE
GeneID:111871582	FALSE	TRUE
GeneID:111871584	TRUE	FALSE
GeneID:111871605	TRUE	FALSE
GeneID:111871614	FALSE	TRUE
GeneID:111871653	TRUE	FALSE
GeneID:111871657	FALSE	TRUE
GeneID:111871654	FALSE	TRUE
GeneID:111871673	TRUE	FALSE
GeneID:111871679	TRUE	FALSE
GeneID:111871678	TRUE	FALSE
GeneID:111871707	FALSE	TRUE
GeneID:111871711	FALSE	TRUE
GeneID:111871721	TRUE	FALSE
GeneID:111871744	FALSE	TRUE
GeneID:111871741	FALSE	TRUE
GeneID:111871734	TRUE	FALSE
GeneID:111871747	TRUE	FALSE
GeneID:111871752	TRUE	FALSE
GeneID:111871751	TRUE	FALSE
GeneID:111871786	TRUE	FALSE
GeneID:111871788	TRUE	FALSE
GeneID:111871787	TRUE	FALSE
GeneID:111871795	TRUE	FALSE
GeneID:111871794	FALSE	TRUE
GeneID:111871806	TRUE	FALSE
GeneID:111871797	FALSE	TRUE
GeneID:111871798	FALSE	TRUE
GeneID:111871805	FALSE	TRUE
GeneID:111871817	TRUE	FALSE
GeneID:111871845	TRUE	FALSE
GeneID:111871898	TRUE	FALSE
GeneID:111871864	TRUE	FALSE
GeneID:111871873	TRUE	FALSE
GeneID:111871871	FALSE	TRUE
GeneID:111871912	FALSE	TRUE
GeneID:111871925	FALSE	TRUE
GeneID:111871930	TRUE	FALSE
GeneID:111871931	FALSE	TRUE
GeneID:111871933	FALSE	TRUE
GeneID:111871927	FALSE	TRUE
GeneID:111871940	TRUE	FALSE
GeneID:111871981	TRUE	FALSE
GeneID:111871979	TRUE	FALSE
GeneID:111869588	FALSE	TRUE
GeneID:111869633	TRUE	FALSE
GeneID:111869637	FALSE	TRUE
GeneID:111869636	FALSE	TRUE
GeneID:111869635	TRUE	FALSE
GeneID:111869631	FALSE	TRUE
GeneID:111869646	FALSE	TRUE
GeneID:111869654	TRUE	FALSE
GeneID:111869721	TRUE	FALSE
GeneID:111869743	TRUE	FALSE
GeneID:111869764	TRUE	FALSE
GeneID:111869763	TRUE	FALSE
GeneID:111869798	TRUE	FALSE
GeneID:111869804	TRUE	FALSE
GeneID:111869799	TRUE	FALSE
GeneID:111869815	FALSE	TRUE
GeneID:111869860	FALSE	TRUE
GeneID:111869883	TRUE	FALSE
GeneID:111869903	FALSE	TRUE
GeneID:111869897	TRUE	FALSE
GeneID:111869895	FALSE	TRUE
GeneID:111869917	FALSE	TRUE
GeneID:111869911	FALSE	TRUE
GeneID:111869965	TRUE	FALSE
GeneID:111869982	TRUE	FALSE
GeneID:111869983	TRUE	FALSE
GeneID:111869973	TRUE	FALSE
GeneID:111869980	TRUE	FALSE
GeneID:111869987	TRUE	FALSE
GeneID:111870014	TRUE	FALSE
GeneID:111870041	TRUE	FALSE
GeneID:111870052	TRUE	FALSE
GeneID:111870101	FALSE	TRUE
GeneID:111870087	FALSE	TRUE
GeneID:111870137	TRUE	FALSE
GeneID:111870125	FALSE	TRUE
GeneID:111870114	FALSE	TRUE
GeneID:111870121	FALSE	TRUE
GeneID:111870159	TRUE	FALSE
GeneID:111870157	TRUE	FALSE
GeneID:111870163	TRUE	FALSE
GeneID:111870165	FALSE	TRUE
GeneID:111870191	TRUE	FALSE
GeneID:111870201	TRUE	FALSE
GeneID:111870206	FALSE	TRUE
GeneID:111870228	TRUE	FALSE
GeneID:111870245	FALSE	TRUE
GeneID:111870241	TRUE	FALSE
GeneID:111870258	TRUE	FALSE
GeneID:111870279	TRUE	FALSE
GeneID:111870289	TRUE	FALSE
GeneID:111870264	TRUE	FALSE
GeneID:111870295	FALSE	TRUE
GeneID:111870332	TRUE	FALSE
GeneID:111870334	TRUE	FALSE
GeneID:111870313	FALSE	TRUE
GeneID:111870314	FALSE	TRUE
GeneID:111870328	TRUE	FALSE
GeneID:111870339	FALSE	TRUE
GeneID:111870361	TRUE	FALSE
GeneID:111870360	FALSE	TRUE
GeneID:111870354	TRUE	FALSE
GeneID:111870372	TRUE	FALSE
GeneID:111875240	TRUE	FALSE
GeneID:111875239	TRUE	FALSE
GeneID:111875261	FALSE	TRUE
GeneID:111875275	TRUE	FALSE
GeneID:111875266	FALSE	TRUE
GeneID:111875247	TRUE	FALSE
GeneID:111875254	TRUE	FALSE
GeneID:111875292	FALSE	TRUE
GeneID:111875299	TRUE	FALSE
GeneID:111875316	FALSE	TRUE
GeneID:111875308	TRUE	FALSE
GeneID:111875311	FALSE	TRUE
GeneID:111875319	TRUE	FALSE
GeneID:111875329	TRUE	FALSE
GeneID:111875351	TRUE	FALSE
GeneID:111875399	TRUE	FALSE
GeneID:111875406	TRUE	FALSE
GeneID:111875422	FALSE	TRUE
GeneID:111875430	TRUE	FALSE
GeneID:111875454	TRUE	FALSE
GeneID:111875477	FALSE	TRUE
GeneID:111875490	TRUE	FALSE
GeneID:111875508	FALSE	TRUE
GeneID:111875506	TRUE	FALSE
GeneID:111875543	FALSE	TRUE
GeneID:111875548	TRUE	FALSE
GeneID:111875512	TRUE	FALSE
GeneID:111875539	TRUE	FALSE
GeneID:111875523	FALSE	TRUE
GeneID:111875549	TRUE	FALSE
GeneID:111875546	TRUE	FALSE
GeneID:111875540	TRUE	FALSE
GeneID:111875544	TRUE	FALSE
GeneID:111875562	TRUE	FALSE
GeneID:111875573	TRUE	FALSE
GeneID:111875619	TRUE	FALSE
GeneID:111875595	FALSE	TRUE
GeneID:111875623	TRUE	FALSE
GeneID:111875647	TRUE	FALSE
GeneID:111875690	TRUE	FALSE
GeneID:111875703	TRUE	FALSE
GeneID:111875708	TRUE	FALSE
GeneID:111875712	FALSE	TRUE
GeneID:111875747	FALSE	TRUE
GeneID:111875736	TRUE	FALSE
GeneID:111875737	TRUE	FALSE
GeneID:111875752	TRUE	FALSE
GeneID:111875733	TRUE	FALSE
GeneID:111875751	TRUE	FALSE
GeneID:111875740	FALSE	TRUE
GeneID:111875766	TRUE	FALSE
GeneID:111875788	FALSE	TRUE
GeneID:111875812	TRUE	FALSE
GeneID:111861219	TRUE	FALSE
GeneID:111861247	TRUE	FALSE
GeneID:111861271	TRUE	FALSE
GeneID:111861266	FALSE	TRUE
GeneID:111861258	TRUE	FALSE
GeneID:111861276	TRUE	FALSE
GeneID:111861285	TRUE	FALSE
GeneID:111861306	FALSE	TRUE
GeneID:111861331	TRUE	FALSE
GeneID:111861338	TRUE	FALSE
GeneID:111861343	TRUE	FALSE
GeneID:111861366	TRUE	FALSE
GeneID:111861387	TRUE	FALSE
GeneID:111861375	FALSE	TRUE
GeneID:111861388	TRUE	FALSE
GeneID:111861382	TRUE	FALSE
GeneID:111861389	TRUE	FALSE
GeneID:111861396	TRUE	FALSE
GeneID:111861391	TRUE	FALSE
GeneID:111861417	FALSE	TRUE
GeneID:111861419	TRUE	FALSE
GeneID:111861468	FALSE	TRUE
GeneID:111861432	FALSE	TRUE
GeneID:111861429	FALSE	TRUE
GeneID:111861430	FALSE	TRUE
GeneID:111861433	TRUE	FALSE
GeneID:111873661	FALSE	TRUE
GeneID:111873666	FALSE	TRUE
GeneID:111873680	TRUE	FALSE
GeneID:111873719	TRUE	FALSE
GeneID:111873720	TRUE	FALSE
GeneID:111873726	FALSE	TRUE
GeneID:111873758	TRUE	FALSE
GeneID:111873741	TRUE	FALSE
GeneID:111873789	TRUE	FALSE
GeneID:111873816	TRUE	FALSE
GeneID:111873817	TRUE	FALSE
GeneID:111873801	TRUE	FALSE
GeneID:111873800	TRUE	FALSE
GeneID:111873799	TRUE	FALSE
GeneID:111873818	TRUE	FALSE
GeneID:111873820	TRUE	FALSE
GeneID:111873835	FALSE	TRUE
GeneID:111873849	TRUE	FALSE
GeneID:111873871	FALSE	TRUE
GeneID:111873897	TRUE	FALSE
GeneID:111873936	TRUE	FALSE
GeneID:111873922	TRUE	FALSE
GeneID:111873925	FALSE	TRUE
GeneID:111873919	TRUE	FALSE
GeneID:111873968	FALSE	TRUE
GeneID:111873971	FALSE	TRUE
GeneID:111874015	TRUE	FALSE
GeneID:111874031	FALSE	TRUE
GeneID:111874040	TRUE	FALSE
GeneID:111874046	TRUE	FALSE
GeneID:111874051	TRUE	FALSE
GeneID:111874062	TRUE	FALSE
GeneID:111874078	FALSE	TRUE
GeneID:111874099	TRUE	FALSE
GeneID:111874142	FALSE	TRUE
GeneID:111874161	FALSE	TRUE
GeneID:111874150	TRUE	FALSE
GeneID:111874130	FALSE	TRUE
GeneID:111874123	FALSE	TRUE
GeneID:111874131	TRUE	FALSE
GeneID:111874185	TRUE	FALSE
GeneID:111874207	FALSE	TRUE
GeneID:111874199	TRUE	FALSE
GeneID:111874221	TRUE	FALSE
GeneID:111874214	TRUE	FALSE
GeneID:111874201	TRUE	FALSE
GeneID:111874139	TRUE	FALSE
GeneID:111874167	FALSE	TRUE
GeneID:111874248	TRUE	FALSE
GeneID:111874244	FALSE	TRUE
GeneID:111874256	FALSE	TRUE
GeneID:111874261	FALSE	TRUE
GeneID:111874276	TRUE	FALSE
GeneID:111874285	FALSE	TRUE
GeneID:111874282	FALSE	TRUE
GeneID:111874310	FALSE	TRUE
GeneID:111874338	TRUE	FALSE
GeneID:111874382	TRUE	FALSE
GeneID:111874383	TRUE	FALSE
GeneID:111874412	TRUE	FALSE
GeneID:111874404	TRUE	FALSE
GeneID:111874405	TRUE	FALSE
GeneID:111874408	TRUE	FALSE
GeneID:111874410	TRUE	FALSE
GeneID:111874395	TRUE	FALSE
GeneID:111874429	FALSE	TRUE
GeneID:111870384	FALSE	TRUE
GeneID:111870388	TRUE	FALSE
GeneID:111870392	FALSE	TRUE
GeneID:111870404	TRUE	FALSE
GeneID:111870401	TRUE	FALSE
GeneID:111870413	FALSE	TRUE
GeneID:111870411	TRUE	FALSE
GeneID:111870426	FALSE	TRUE
GeneID:111870434	TRUE	FALSE
GeneID:111870445	FALSE	TRUE
GeneID:111870467	TRUE	FALSE
GeneID:111870474	FALSE	TRUE
GeneID:111870486	FALSE	TRUE
GeneID:111870484	FALSE	TRUE
GeneID:111870543	TRUE	FALSE
GeneID:111870546	FALSE	TRUE
GeneID:111870557	FALSE	TRUE
GeneID:111870568	TRUE	FALSE
GeneID:111870586	TRUE	FALSE
GeneID:111870593	TRUE	FALSE
GeneID:111870615	FALSE	TRUE
GeneID:111870603	FALSE	TRUE
GeneID:111870622	FALSE	TRUE
GeneID:111870620	FALSE	TRUE
GeneID:111870621	FALSE	TRUE
GeneID:111870631	TRUE	FALSE
GeneID:111870636	FALSE	TRUE
GeneID:111870627	TRUE	FALSE
GeneID:111870671	TRUE	FALSE
GeneID:111870668	TRUE	FALSE
GeneID:111870669	FALSE	TRUE
GeneID:111870687	TRUE	FALSE
GeneID:111870704	TRUE	FALSE
GeneID:111870718	TRUE	FALSE
GeneID:111870719	FALSE	TRUE
GeneID:111870738	TRUE	FALSE
GeneID:111870737	TRUE	FALSE
GeneID:111870735	TRUE	FALSE
GeneID:111870728	TRUE	FALSE
GeneID:111870740	TRUE	FALSE
GeneID:111870733	FALSE	TRUE
GeneID:111870761	TRUE	FALSE
GeneID:111870816	TRUE	FALSE
GeneID:111870780	FALSE	TRUE
GeneID:111870852	TRUE	FALSE
GeneID:111870836	FALSE	TRUE
GeneID:111870851	TRUE	FALSE
GeneID:111870838	FALSE	TRUE
GeneID:111870868	FALSE	TRUE
GeneID:111870884	FALSE	TRUE
GeneID:111870874	FALSE	TRUE
GeneID:111870885	FALSE	TRUE
GeneID:111870893	FALSE	TRUE
GeneID:111870881	FALSE	TRUE
GeneID:111870882	FALSE	TRUE
GeneID:111870903	FALSE	TRUE
GeneID:111870926	FALSE	TRUE
GeneID:111870913	TRUE	FALSE
GeneID:111870915	FALSE	TRUE
GeneID:111870914	FALSE	TRUE
GeneID:111870976	TRUE	FALSE
GeneID:111870981	TRUE	FALSE
GeneID:111870959	TRUE	FALSE
GeneID:111870947	TRUE	FALSE
GeneID:111870953	TRUE	FALSE
GeneID:111870968	FALSE	TRUE
GeneID:111870969	FALSE	TRUE
GeneID:111870967	FALSE	TRUE
GeneID:111871049	TRUE	FALSE
GeneID:111871077	FALSE	TRUE
GeneID:111871076	TRUE	FALSE
GeneID:111871075	TRUE	FALSE
GeneID:111871061	FALSE	TRUE
GeneID:111871067	TRUE	FALSE
GeneID:111871071	TRUE	FALSE
GeneID:111871048	TRUE	FALSE
GeneID:111871046	TRUE	FALSE
GeneID:111871085	TRUE	FALSE
GeneID:111871106	TRUE	FALSE
GeneID:111871142	FALSE	TRUE
GeneID:111871095	TRUE	FALSE
GeneID:111871093	FALSE	TRUE
GeneID:111871094	TRUE	FALSE
GeneID:111871191	TRUE	FALSE
GeneID:111871185	TRUE	FALSE
GeneID:111872810	FALSE	TRUE
GeneID:111872812	TRUE	FALSE
GeneID:111872824	TRUE	FALSE
GeneID:111872827	FALSE	TRUE
GeneID:111872863	TRUE	FALSE
GeneID:111872884	FALSE	TRUE
GeneID:111872873	FALSE	TRUE
GeneID:111872900	FALSE	TRUE
GeneID:111872921	FALSE	TRUE
GeneID:111872919	TRUE	FALSE
GeneID:111872945	FALSE	TRUE
GeneID:111872938	FALSE	TRUE
GeneID:111872975	TRUE	FALSE
GeneID:111873000	FALSE	TRUE
GeneID:111873003	TRUE	FALSE
GeneID:111873002	TRUE	FALSE
GeneID:111873032	TRUE	FALSE
GeneID:111873079	TRUE	FALSE
GeneID:111873094	TRUE	FALSE
GeneID:111873083	TRUE	FALSE
GeneID:111873099	TRUE	FALSE
GeneID:111873080	TRUE	FALSE
GeneID:111873076	TRUE	FALSE
GeneID:111873077	FALSE	TRUE
GeneID:111873109	FALSE	TRUE
GeneID:111873132	TRUE	FALSE
GeneID:111873172	TRUE	FALSE
GeneID:111873180	TRUE	FALSE
GeneID:111873211	TRUE	FALSE
GeneID:111873193	TRUE	FALSE
GeneID:111873217	TRUE	FALSE
GeneID:111873210	TRUE	FALSE
GeneID:111873187	TRUE	FALSE
GeneID:111873228	TRUE	FALSE
GeneID:111873227	FALSE	TRUE
GeneID:111873230	TRUE	FALSE
GeneID:111873229	TRUE	FALSE
GeneID:111873241	FALSE	TRUE
GeneID:111873238	TRUE	FALSE
GeneID:111873271	FALSE	TRUE
GeneID:111873272	TRUE	FALSE
GeneID:111873273	TRUE	FALSE
GeneID:111873297	FALSE	TRUE
GeneID:111873310	FALSE	TRUE
GeneID:111873319	TRUE	FALSE
GeneID:111873333	FALSE	TRUE
GeneID:111873391	TRUE	FALSE
GeneID:111873387	FALSE	TRUE
GeneID:111873414	TRUE	FALSE
GeneID:111873415	TRUE	FALSE
GeneID:111873429	FALSE	TRUE
GeneID:111873422	TRUE	FALSE
GeneID:111873423	FALSE	TRUE
GeneID:111873468	TRUE	FALSE
GeneID:111873455	TRUE	FALSE
GeneID:111873457	TRUE	FALSE
GeneID:111873469	FALSE	TRUE
GeneID:111873476	FALSE	TRUE
GeneID:111873507	FALSE	TRUE
GeneID:111873539	TRUE	FALSE
GeneID:111873533	FALSE	TRUE
GeneID:111873498	FALSE	TRUE
GeneID:111873536	FALSE	TRUE
GeneID:111873511	FALSE	TRUE
GeneID:111873531	TRUE	FALSE
GeneID:111873492	TRUE	FALSE
GeneID:111873532	FALSE	TRUE
GeneID:111873505	TRUE	FALSE
GeneID:111873506	FALSE	TRUE
GeneID:111873560	FALSE	TRUE
GeneID:111873548	FALSE	TRUE
GeneID:111873555	TRUE	FALSE
GeneID:111873589	TRUE	FALSE
GeneID:111873570	FALSE	TRUE
GeneID:111873582	TRUE	FALSE
GeneID:111873571	TRUE	FALSE
GeneID:111873579	FALSE	TRUE
GeneID:111873624	FALSE	TRUE
GeneID:111873612	TRUE	FALSE
GeneID:111873623	TRUE	FALSE
GeneID:111873649	TRUE	FALSE
GeneID:111863899	FALSE	TRUE
GeneID:111863999	TRUE	FALSE
GeneID:111863998	TRUE	FALSE
GeneID:111864001	TRUE	FALSE
GeneID:111864019	TRUE	FALSE
GeneID:111864041	FALSE	TRUE
GeneID:111864040	TRUE	FALSE
GeneID:111864077	TRUE	FALSE
GeneID:111864071	FALSE	TRUE
GeneID:111864117	FALSE	TRUE
GeneID:111864094	FALSE	TRUE
GeneID:111864095	FALSE	TRUE
GeneID:111864103	FALSE	TRUE
GeneID:111864125	TRUE	FALSE
GeneID:111864139	TRUE	FALSE
GeneID:111864156	TRUE	FALSE
GeneID:111864172	TRUE	FALSE
GeneID:111864179	FALSE	TRUE
GeneID:111864208	TRUE	FALSE
GeneID:111864224	TRUE	FALSE
GeneID:111864226	TRUE	FALSE
GeneID:111864279	FALSE	TRUE
GeneID:111864291	FALSE	TRUE
GeneID:111864292	FALSE	TRUE
GeneID:111864285	TRUE	FALSE
GeneID:111864268	FALSE	TRUE
GeneID:111864290	TRUE	FALSE
GeneID:117282290	TRUE	FALSE
GeneID:111864259	FALSE	TRUE
GeneID:111864260	FALSE	TRUE
GeneID:111864272	TRUE	FALSE
GeneID:111864267	TRUE	FALSE
GeneID:111864305	TRUE	FALSE
GeneID:111864300	FALSE	TRUE
GeneID:111864320	TRUE	FALSE
GeneID:111864331	TRUE	FALSE
GeneID:111864335	TRUE	FALSE
GeneID:111864342	TRUE	FALSE
GeneID:111864313	FALSE	TRUE
GeneID:111864324	TRUE	FALSE
GeneID:111864315	TRUE	FALSE
GeneID:111864351	FALSE	TRUE
GeneID:117282301	TRUE	FALSE
GeneID:111864361	TRUE	FALSE
GeneID:111864352	TRUE	FALSE
GeneID:111864365	FALSE	TRUE
GeneID:111864397	FALSE	TRUE
GeneID:111864415	TRUE	FALSE
GeneID:111864439	TRUE	FALSE
GeneID:111864456	TRUE	FALSE
GeneID:111864445	TRUE	FALSE
GeneID:111864447	TRUE	FALSE
GeneID:111864458	TRUE	FALSE
GeneID:111864468	TRUE	FALSE
GeneID:111864488	FALSE	TRUE
GeneID:111864500	TRUE	FALSE
GeneID:111864514	FALSE	TRUE
GeneID:111864525	FALSE	TRUE
GeneID:111864533	TRUE	FALSE
GeneID:111864545	TRUE	FALSE
GeneID:111864541	TRUE	FALSE
GeneID:111864542	TRUE	FALSE
GeneID:111864552	TRUE	FALSE
GeneID:111864611	FALSE	TRUE
GeneID:111864599	TRUE	FALSE
GeneID:111864648	TRUE	FALSE
GeneID:111864669	TRUE	FALSE
GeneID:111864676	TRUE	FALSE
GeneID:111864679	TRUE	FALSE
GeneID:111864699	FALSE	TRUE
GeneID:111864686	FALSE	TRUE
GeneID:111864693	TRUE	FALSE
GeneID:111864719	TRUE	FALSE
GeneID:111864718	TRUE	FALSE
GeneID:111864710	FALSE	TRUE
GeneID:111864739	TRUE	FALSE
GeneID:111865536	TRUE	FALSE
GeneID:111865578	FALSE	TRUE
GeneID:111865588	TRUE	FALSE
GeneID:111865608	TRUE	FALSE
GeneID:111865602	TRUE	FALSE
GeneID:111865625	TRUE	FALSE
GeneID:111865652	TRUE	FALSE
GeneID:111865681	TRUE	FALSE
GeneID:111865673	FALSE	TRUE
GeneID:111865712	TRUE	FALSE
GeneID:111865694	TRUE	FALSE
GeneID:111865676	FALSE	TRUE
GeneID:111865720	TRUE	FALSE
GeneID:111865727	FALSE	TRUE
GeneID:111865728	FALSE	TRUE
GeneID:111865731	TRUE	FALSE
GeneID:111865740	FALSE	TRUE
GeneID:111865749	FALSE	TRUE
GeneID:117282417	FALSE	TRUE
GeneID:111865776	TRUE	FALSE
GeneID:111865786	TRUE	FALSE
GeneID:111865778	TRUE	FALSE
GeneID:111865793	FALSE	TRUE
GeneID:111865818	TRUE	FALSE
GeneID:111865830	FALSE	TRUE
GeneID:111865839	TRUE	FALSE
GeneID:111865836	FALSE	TRUE
GeneID:111865838	FALSE	TRUE
GeneID:111865849	FALSE	TRUE
GeneID:111865850	FALSE	TRUE
GeneID:111865852	TRUE	FALSE
GeneID:111865915	TRUE	FALSE
GeneID:111865945	TRUE	FALSE
GeneID:111865951	FALSE	TRUE
GeneID:111865961	TRUE	FALSE
GeneID:111865980	TRUE	FALSE
GeneID:111865981	TRUE	FALSE
GeneID:111866018	TRUE	FALSE
GeneID:111866017	TRUE	FALSE
GeneID:111865993	FALSE	TRUE
GeneID:111866008	FALSE	TRUE
GeneID:111865990	TRUE	FALSE
GeneID:111865984	TRUE	FALSE
GeneID:111866014	FALSE	TRUE
GeneID:111865992	TRUE	FALSE
GeneID:111866111	FALSE	TRUE
GeneID:111866071	TRUE	FALSE
GeneID:111866150	TRUE	FALSE
GeneID:111866046	TRUE	FALSE
GeneID:111866126	FALSE	TRUE
GeneID:111866124	TRUE	FALSE
GeneID:111866087	TRUE	FALSE
GeneID:111866109	TRUE	FALSE
GeneID:111866104	TRUE	FALSE
GeneID:111866064	FALSE	TRUE
GeneID:111866068	FALSE	TRUE
GeneID:111866069	TRUE	FALSE
GeneID:111866138	TRUE	FALSE
GeneID:111866155	TRUE	FALSE
GeneID:111866156	TRUE	FALSE
GeneID:111866065	FALSE	TRUE
GeneID:111866083	FALSE	TRUE
GeneID:111866179	TRUE	FALSE
GeneID:111866180	TRUE	FALSE
GeneID:111866158	TRUE	FALSE
GeneID:111866163	TRUE	FALSE
GeneID:111866232	FALSE	TRUE
GeneID:111866241	TRUE	FALSE
GeneID:111866245	FALSE	TRUE
GeneID:111866280	FALSE	TRUE
GeneID:111866277	TRUE	FALSE
GeneID:111866265	TRUE	FALSE
GeneID:111866305	TRUE	FALSE
GeneID:111866310	TRUE	FALSE
GeneID:111866322	TRUE	FALSE
GeneID:111866334	FALSE	TRUE
GeneID:111862286	TRUE	FALSE
GeneID:111862280	TRUE	FALSE
GeneID:111862261	TRUE	FALSE
GeneID:111862296	FALSE	TRUE
GeneID:111862253	TRUE	FALSE
GeneID:111862272	TRUE	FALSE
GeneID:111862305	FALSE	TRUE
GeneID:111862344	TRUE	FALSE
GeneID:111862334	TRUE	FALSE
GeneID:111862335	TRUE	FALSE
GeneID:111862372	FALSE	TRUE
GeneID:111862374	FALSE	TRUE
GeneID:111862378	TRUE	FALSE
GeneID:111862393	TRUE	FALSE
GeneID:111862427	TRUE	FALSE
GeneID:111862431	TRUE	FALSE
GeneID:111862442	FALSE	TRUE
GeneID:111862471	FALSE	TRUE
GeneID:111862505	FALSE	TRUE
GeneID:111862502	FALSE	TRUE
GeneID:111862454	TRUE	FALSE
GeneID:111862513	FALSE	TRUE
GeneID:111862519	TRUE	FALSE
GeneID:111862542	FALSE	TRUE
GeneID:111862551	FALSE	TRUE
GeneID:111862555	TRUE	FALSE
GeneID:111862557	FALSE	TRUE
GeneID:111862609	TRUE	FALSE
GeneID:111862595	TRUE	FALSE
GeneID:111862602	TRUE	FALSE
GeneID:111862608	TRUE	FALSE
GeneID:111862603	FALSE	TRUE
GeneID:111862601	TRUE	FALSE
GeneID:111862713	TRUE	FALSE
GeneID:111862711	FALSE	TRUE
GeneID:111862749	TRUE	FALSE
GeneID:111862758	TRUE	FALSE
GeneID:111862703	TRUE	FALSE
GeneID:111862661	TRUE	FALSE
GeneID:111862647	TRUE	FALSE
GeneID:111862696	FALSE	TRUE
GeneID:111862652	FALSE	TRUE
GeneID:111862772	FALSE	TRUE
GeneID:111862830	FALSE	TRUE
GeneID:111862814	TRUE	FALSE
GeneID:111862811	TRUE	FALSE
GeneID:111862806	FALSE	TRUE
GeneID:111862790	FALSE	TRUE
GeneID:111862859	TRUE	FALSE
GeneID:111862795	FALSE	TRUE
GeneID:111862868	TRUE	FALSE
GeneID:111862880	TRUE	FALSE
GeneID:111862897	FALSE	TRUE
GeneID:111862898	FALSE	TRUE
GeneID:111862882	FALSE	TRUE
GeneID:111862912	TRUE	FALSE
GeneID:111862922	TRUE	FALSE
GeneID:111862915	TRUE	FALSE
GeneID:111862914	TRUE	FALSE
GeneID:111862917	FALSE	TRUE
GeneID:111862933	FALSE	TRUE
GeneID:117282204	FALSE	TRUE
GeneID:111862988	FALSE	TRUE
GeneID:111862979	FALSE	TRUE
GeneID:111863026	TRUE	FALSE
GeneID:111863018	TRUE	FALSE
GeneID:111862985	TRUE	FALSE
GeneID:111862961	TRUE	FALSE
GeneID:111863015	TRUE	FALSE
GeneID:111863005	TRUE	FALSE
GeneID:111863009	TRUE	FALSE
GeneID:111863041	FALSE	TRUE
GeneID:111863048	FALSE	TRUE
GeneID:111863052	TRUE	FALSE
GeneID:111863077	TRUE	FALSE
GeneID:111863055	TRUE	FALSE
GeneID:111863085	TRUE	FALSE
GeneID:111863092	TRUE	FALSE
GeneID:111867176	TRUE	FALSE
GeneID:111867369	TRUE	FALSE
GeneID:111867684	FALSE	TRUE
GeneID:111867786	TRUE	FALSE
GeneID:111867853	FALSE	TRUE
GeneID:111868083	FALSE	TRUE
GeneID:111868408	FALSE	TRUE
GeneID:111868186	FALSE	TRUE
GeneID:111868680	FALSE	TRUE
GeneID:111868640	TRUE	FALSE
GeneID:111868816	FALSE	TRUE
GeneID:111868498	TRUE	FALSE
GeneID:111868987	FALSE	TRUE
GeneID:111869107	TRUE	FALSE
GeneID:111869081	TRUE	FALSE
GeneID:111869356	TRUE	FALSE
GeneID:111869373	FALSE	TRUE
GeneID:111869379	TRUE	FALSE
GeneID:111869395	TRUE	FALSE
GeneID:111869263	FALSE	TRUE
GeneID:111869551	FALSE	TRUE
GeneID:117282723	FALSE	TRUE
GeneID:111869723	TRUE	FALSE
GeneID:111869924	TRUE	FALSE
GeneID:111869969	TRUE	FALSE
GeneID:111870016	TRUE	FALSE
GeneID:111870096	FALSE	TRUE
GeneID:111870090	FALSE	TRUE
GeneID:111870174	TRUE	FALSE
GeneID:111870350	TRUE	FALSE
GeneID:111870607	FALSE	TRUE
GeneID:111870691	TRUE	FALSE
GeneID:111870821	TRUE	FALSE
GeneID:111870944	FALSE	TRUE
GeneID:111870992	FALSE	TRUE
GeneID:111871033	TRUE	FALSE
GeneID:111871194	TRUE	FALSE
GeneID:111871303	FALSE	TRUE
GeneID:111871352	TRUE	FALSE
GeneID:111871583	TRUE	FALSE
GeneID:111871754	FALSE	TRUE
GeneID:111871907	FALSE	TRUE
GeneID:111871958	FALSE	TRUE
GeneID:111872050	TRUE	FALSE
GeneID:111872252	FALSE	TRUE
GeneID:111872160	FALSE	TRUE
GeneID:111872187	TRUE	FALSE
GeneID:111872404	TRUE	FALSE
GeneID:111872525	TRUE	FALSE
GeneID:111872611	TRUE	FALSE
GeneID:111872597	TRUE	FALSE
GeneID:111872617	TRUE	FALSE
GeneID:111872977	TRUE	FALSE
GeneID:111873038	FALSE	TRUE
GeneID:111873323	FALSE	TRUE
GeneID:111873302	TRUE	FALSE
GeneID:111873185	TRUE	FALSE
GeneID:111873610	FALSE	TRUE
GeneID:111873642	FALSE	TRUE
GeneID:111874457	TRUE	FALSE
GeneID:111874367	FALSE	TRUE
GeneID:111874184	TRUE	FALSE
GeneID:111874546	FALSE	TRUE
GeneID:111873843	FALSE	TRUE
GeneID:111873848	TRUE	FALSE
GeneID:111873956	FALSE	TRUE
GeneID:111874711	TRUE	FALSE
GeneID:111875048	TRUE	FALSE
GeneID:111875149	TRUE	FALSE
GeneID:111871994	TRUE	FALSE
GeneID:111872027	TRUE	FALSE
GeneID:111872041	TRUE	FALSE
GeneID:111872028	TRUE	FALSE
GeneID:111872033	FALSE	TRUE
GeneID:111872048	TRUE	FALSE
GeneID:111872053	TRUE	FALSE
GeneID:111872058	TRUE	FALSE
GeneID:111872080	TRUE	FALSE
GeneID:111872083	FALSE	TRUE
GeneID:111872094	TRUE	FALSE
GeneID:111872100	TRUE	FALSE
GeneID:111872122	TRUE	FALSE
GeneID:111872141	FALSE	TRUE
GeneID:111872139	FALSE	TRUE
GeneID:111872149	FALSE	TRUE
GeneID:111872157	TRUE	FALSE
GeneID:111872162	FALSE	TRUE
GeneID:111872188	TRUE	FALSE
GeneID:111872197	TRUE	FALSE
GeneID:111872206	FALSE	TRUE
GeneID:111872203	FALSE	TRUE
GeneID:111872230	TRUE	FALSE
GeneID:111872248	TRUE	FALSE
GeneID:111872268	TRUE	FALSE
GeneID:111872269	FALSE	TRUE
GeneID:111872296	TRUE	FALSE
GeneID:111872308	FALSE	TRUE
GeneID:111872288	TRUE	FALSE
GeneID:111872281	FALSE	TRUE
GeneID:111872306	TRUE	FALSE
GeneID:111872313	FALSE	TRUE
GeneID:111872318	FALSE	TRUE
GeneID:111872319	FALSE	TRUE
GeneID:111872357	TRUE	FALSE
GeneID:111872406	TRUE	FALSE
GeneID:111872434	FALSE	TRUE
GeneID:111872401	FALSE	TRUE
GeneID:111872387	FALSE	TRUE
GeneID:111872382	FALSE	TRUE
GeneID:111872411	FALSE	TRUE
GeneID:111872379	TRUE	FALSE
GeneID:111872471	TRUE	FALSE
GeneID:111872479	FALSE	TRUE
GeneID:111872485	TRUE	FALSE
GeneID:111872532	TRUE	FALSE
GeneID:117282955	FALSE	TRUE
GeneID:111872517	TRUE	FALSE
GeneID:111872508	TRUE	FALSE
GeneID:111872557	FALSE	TRUE
GeneID:111872563	TRUE	FALSE
GeneID:111872567	FALSE	TRUE
GeneID:111872601	TRUE	FALSE
GeneID:111872614	TRUE	FALSE
GeneID:111872612	TRUE	FALSE
GeneID:111872637	TRUE	FALSE
GeneID:111872658	TRUE	FALSE
GeneID:111872668	TRUE	FALSE
GeneID:111872672	TRUE	FALSE
GeneID:111872693	FALSE	TRUE
GeneID:111872694	TRUE	FALSE
GeneID:111872686	FALSE	TRUE
GeneID:111872697	TRUE	FALSE
GeneID:111872711	TRUE	FALSE
GeneID:111872718	TRUE	FALSE
GeneID:111872727	TRUE	FALSE
GeneID:111872742	TRUE	FALSE
GeneID:111872746	TRUE	FALSE
GeneID:111872762	TRUE	FALSE
GeneID:111872780	TRUE	FALSE
GeneID:111866351	TRUE	FALSE
GeneID:111866361	TRUE	FALSE
GeneID:111866367	TRUE	FALSE
GeneID:111866360	FALSE	TRUE
GeneID:111866424	TRUE	FALSE
GeneID:111866438	TRUE	FALSE
GeneID:111866428	TRUE	FALSE
GeneID:111866441	TRUE	FALSE
GeneID:111866442	TRUE	FALSE
GeneID:111866447	FALSE	TRUE
GeneID:111866461	FALSE	TRUE
GeneID:111866465	FALSE	TRUE
GeneID:111866462	FALSE	TRUE
GeneID:111866464	TRUE	FALSE
GeneID:111866503	FALSE	TRUE
GeneID:111866507	TRUE	FALSE
GeneID:111866537	FALSE	TRUE
GeneID:111866545	FALSE	TRUE
GeneID:111866563	TRUE	FALSE
GeneID:111866553	FALSE	TRUE
GeneID:111866576	TRUE	FALSE
GeneID:111866586	TRUE	FALSE
GeneID:111866589	TRUE	FALSE
GeneID:111866584	TRUE	FALSE
GeneID:111866585	TRUE	FALSE
GeneID:111866591	TRUE	FALSE
GeneID:111866602	TRUE	FALSE
GeneID:111866605	TRUE	FALSE
GeneID:111866615	TRUE	FALSE
GeneID:111866616	TRUE	FALSE
GeneID:111866632	FALSE	TRUE
GeneID:111866634	FALSE	TRUE
GeneID:111866638	FALSE	TRUE
GeneID:111866667	FALSE	TRUE
GeneID:111866670	TRUE	FALSE
GeneID:111866696	TRUE	FALSE
GeneID:111866716	FALSE	TRUE
GeneID:111866680	FALSE	TRUE
GeneID:111866703	FALSE	TRUE
GeneID:111866755	FALSE	TRUE
GeneID:111866739	TRUE	FALSE
GeneID:111866745	FALSE	TRUE
GeneID:111866731	FALSE	TRUE
GeneID:111866737	TRUE	FALSE
GeneID:111866764	FALSE	TRUE
GeneID:111866817	TRUE	FALSE
GeneID:111866811	FALSE	TRUE
GeneID:111866803	FALSE	TRUE
GeneID:111866839	TRUE	FALSE
GeneID:111866837	FALSE	TRUE
GeneID:111866838	FALSE	TRUE
GeneID:111866835	FALSE	TRUE
GeneID:111866883	TRUE	FALSE
GeneID:111866869	TRUE	FALSE
GeneID:111866940	TRUE	FALSE
GeneID:111866927	FALSE	TRUE
GeneID:111866929	FALSE	TRUE
GeneID:111866943	TRUE	FALSE
GeneID:111866941	TRUE	FALSE
GeneID:111866939	TRUE	FALSE
GeneID:111866947	TRUE	FALSE
GeneID:111866922	TRUE	FALSE
GeneID:111866931	FALSE	TRUE
GeneID:111866932	TRUE	FALSE
GeneID:111866919	FALSE	TRUE
GeneID:111866957	TRUE	FALSE
GeneID:111866955	TRUE	FALSE
GeneID:111866971	TRUE	FALSE
GeneID:111866970	TRUE	FALSE
GeneID:111866966	TRUE	FALSE
GeneID:111867012	FALSE	TRUE
GeneID:111867036	TRUE	FALSE
GeneID:111867050	TRUE	FALSE
GeneID:111867047	TRUE	FALSE
GeneID:111867070	FALSE	TRUE
GeneID:111867066	TRUE	FALSE
GeneID:111867057	FALSE	TRUE
GeneID:111867091	TRUE	FALSE
GeneID:111867081	FALSE	TRUE
GeneID:111867115	FALSE	TRUE
GeneID:111867114	TRUE	FALSE
GeneID:111867125	TRUE	FALSE
GeneID:111867126	TRUE	FALSE
GeneID:111867124	TRUE	FALSE
GeneID:111867133	TRUE	FALSE
GeneID:111867136	TRUE	FALSE
GeneID:111867142	TRUE	FALSE
GeneID:111867153	TRUE	FALSE
GeneID:111867152	TRUE	FALSE
GeneID:111867159	TRUE	FALSE
GeneID:111867158	FALSE	TRUE
GeneID:111867167	FALSE	TRUE
GeneID:111867183	FALSE	TRUE
GeneID:111867196	TRUE	FALSE
GeneID:111867218	TRUE	FALSE
GeneID:111867199	FALSE	TRUE
GeneID:111867249	TRUE	FALSE
GeneID:111867248	FALSE	TRUE
GeneID:111867255	FALSE	TRUE
GeneID:111867271	TRUE	FALSE
GeneID:111867318	FALSE	TRUE
GeneID:111867321	FALSE	TRUE
GeneID:111867323	FALSE	TRUE
GeneID:111867348	TRUE	FALSE
GeneID:111867366	TRUE	FALSE
GeneID:111867388	FALSE	TRUE
GeneID:111867406	FALSE	TRUE
GeneID:111867444	TRUE	FALSE
GeneID:111867442	TRUE	FALSE
GeneID:111867451	FALSE	TRUE
GeneID:111867508	FALSE	TRUE
GeneID:111867502	TRUE	FALSE
GeneID:111867527	TRUE	FALSE
GeneID:111867533	FALSE	TRUE
GeneID:111867534	FALSE	TRUE
GeneID:111867547	TRUE	FALSE
GeneID:111867590	TRUE	FALSE
GeneID:111867579	TRUE	FALSE
GeneID:111867586	TRUE	FALSE
GeneID:111867594	TRUE	FALSE
GeneID:111867624	FALSE	TRUE
GeneID:111867597	TRUE	FALSE
GeneID:111867620	FALSE	TRUE
GeneID:111867639	FALSE	TRUE
GeneID:111867631	TRUE	FALSE
GeneID:111867610	FALSE	TRUE
GeneID:111867668	TRUE	FALSE
GeneID:111867648	TRUE	FALSE
GeneID:111867650	TRUE	FALSE
GeneID:111867658	FALSE	TRUE
GeneID:111867675	TRUE	FALSE
GeneID:111867687	FALSE	TRUE
GeneID:111867721	FALSE	TRUE
GeneID:111867734	TRUE	FALSE
GeneID:111867736	TRUE	FALSE
GeneID:111867761	FALSE	TRUE
GeneID:111867759	FALSE	TRUE
GeneID:111867758	TRUE	FALSE
GeneID:111867769	FALSE	TRUE
GeneID:111867763	FALSE	TRUE
GeneID:111867783	TRUE	FALSE
GeneID:111867798	TRUE	FALSE
GeneID:111867800	TRUE	FALSE
GeneID:111867815	TRUE	FALSE
GeneID:111867825	FALSE	TRUE
GeneID:111867854	TRUE	FALSE
GeneID:111867867	TRUE	FALSE
GeneID:111867884	TRUE	FALSE
GeneID:111867885	FALSE	TRUE
GeneID:111867876	TRUE	FALSE
GeneID:111867877	TRUE	FALSE
GeneID:111867887	TRUE	FALSE
GeneID:111867878	TRUE	FALSE
GeneID:111867896	TRUE	FALSE
GeneID:111867928	FALSE	TRUE
GeneID:111867927	FALSE	TRUE
GeneID:111867939	FALSE	TRUE
GeneID:111867961	TRUE	FALSE
GeneID:111867973	TRUE	FALSE
GeneID:111868012	TRUE	FALSE
GeneID:111868003	FALSE	TRUE
GeneID:111868020	TRUE	FALSE
GeneID:111868029	FALSE	TRUE
GeneID:111868046	TRUE	FALSE
GeneID:111868055	FALSE	TRUE
GeneID:111868057	TRUE	FALSE
GeneID:111868072	FALSE	TRUE
GeneID:111868071	FALSE	TRUE
GeneID:111868080	TRUE	FALSE
GeneID:111868082	TRUE	FALSE
GeneID:111868073	TRUE	FALSE
GeneID:111868094	TRUE	FALSE
GeneID:111868095	TRUE	FALSE
GeneID:111868109	TRUE	FALSE
GeneID:111868131	TRUE	FALSE
GeneID:111868148	FALSE	TRUE
GeneID:111868188	TRUE	FALSE
GeneID:111868180	TRUE	FALSE
GeneID:111868185	FALSE	TRUE
GeneID:111868206	FALSE	TRUE
GeneID:111868195	TRUE	FALSE
GeneID:111868220	FALSE	TRUE
GeneID:111868237	TRUE	FALSE
GeneID:111868248	TRUE	FALSE
GeneID:111868256	FALSE	TRUE
GeneID:111868265	TRUE	FALSE
GeneID:111868279	FALSE	TRUE
GeneID:111868302	TRUE	FALSE
GeneID:111868358	TRUE	FALSE
GeneID:111868362	TRUE	FALSE
GeneID:111868379	FALSE	TRUE
GeneID:111868400	TRUE	FALSE
GeneID:111868394	TRUE	FALSE
GeneID:111868455	TRUE	FALSE
GeneID:111868435	TRUE	FALSE
GeneID:111868449	TRUE	FALSE
GeneID:111868426	FALSE	TRUE
GeneID:111868414	TRUE	FALSE
GeneID:111868417	TRUE	FALSE
GeneID:111868446	TRUE	FALSE
GeneID:111868465	TRUE	FALSE
GeneID:111868488	FALSE	TRUE
GeneID:111868484	TRUE	FALSE
GeneID:111868479	TRUE	FALSE
GeneID:111868505	FALSE	TRUE
GeneID:111868497	TRUE	FALSE
GeneID:111868568	FALSE	TRUE
GeneID:111868565	TRUE	FALSE
GeneID:111868544	TRUE	FALSE
GeneID:111868573	TRUE	FALSE
GeneID:111868576	FALSE	TRUE
GeneID:111868611	FALSE	TRUE
GeneID:111868622	FALSE	TRUE
GeneID:111868634	TRUE	FALSE
GeneID:111868654	TRUE	FALSE
GeneID:111868629	TRUE	FALSE
GeneID:111868628	TRUE	FALSE
GeneID:111868681	TRUE	FALSE
GeneID:111868690	TRUE	FALSE
GeneID:111868692	FALSE	TRUE
GeneID:111868736	FALSE	TRUE
GeneID:111863166	TRUE	FALSE
GeneID:111863179	TRUE	FALSE
GeneID:111863180	TRUE	FALSE
GeneID:111863187	TRUE	FALSE
GeneID:111863183	TRUE	FALSE
GeneID:111863193	TRUE	FALSE
GeneID:111863278	FALSE	TRUE
GeneID:111863245	FALSE	TRUE
GeneID:111863247	TRUE	FALSE
GeneID:111863271	FALSE	TRUE
GeneID:111863257	FALSE	TRUE
GeneID:111863304	TRUE	FALSE
GeneID:111863316	FALSE	TRUE
GeneID:111863330	TRUE	FALSE
GeneID:111863321	TRUE	FALSE
GeneID:111863346	TRUE	FALSE
GeneID:111863352	TRUE	FALSE
GeneID:111863358	TRUE	FALSE
GeneID:111863385	TRUE	FALSE
GeneID:111863383	TRUE	FALSE
GeneID:111863369	FALSE	TRUE
GeneID:111863367	TRUE	FALSE
GeneID:111863394	FALSE	TRUE
GeneID:111863418	TRUE	FALSE
GeneID:111863429	TRUE	FALSE
GeneID:111863444	TRUE	FALSE
GeneID:111863498	FALSE	TRUE
GeneID:111863529	TRUE	FALSE
GeneID:111863537	FALSE	TRUE
GeneID:111863545	TRUE	FALSE
GeneID:111863564	TRUE	FALSE
GeneID:111863575	TRUE	FALSE
GeneID:111863540	TRUE	FALSE
GeneID:111863570	FALSE	TRUE
GeneID:111863593	FALSE	TRUE
GeneID:111863594	FALSE	TRUE
GeneID:111863627	TRUE	FALSE
GeneID:111863625	TRUE	FALSE
GeneID:111863631	FALSE	TRUE
GeneID:111863661	TRUE	FALSE
GeneID:111863663	FALSE	TRUE
GeneID:111863674	TRUE	FALSE
GeneID:111863675	TRUE	FALSE
GeneID:111863668	TRUE	FALSE
GeneID:111863658	TRUE	FALSE
GeneID:111863681	FALSE	TRUE
GeneID:111863686	TRUE	FALSE
GeneID:111863693	FALSE	TRUE
GeneID:111863715	TRUE	FALSE
GeneID:111863720	FALSE	TRUE
GeneID:111863724	TRUE	FALSE
GeneID:111863728	TRUE	FALSE
GeneID:111863734	FALSE	TRUE
GeneID:111863735	FALSE	TRUE
GeneID:111863770	TRUE	FALSE
GeneID:111863771	TRUE	FALSE
GeneID:111863759	FALSE	TRUE
GeneID:111863749	TRUE	FALSE
GeneID:111863789	TRUE	FALSE
GeneID:111863806	TRUE	FALSE
GeneID:111863822	TRUE	FALSE
GeneID:111863817	TRUE	FALSE
GeneID:111863821	TRUE	FALSE
GeneID:111863824	TRUE	FALSE
GeneID:111863835	TRUE	FALSE
GeneID:111863859	TRUE	FALSE
GeneID:111863853	TRUE	FALSE
GeneID:111863837	TRUE	FALSE
GeneID:111863855	FALSE	TRUE
GeneID:111863847	TRUE	FALSE
GeneID:111863860	TRUE	FALSE
GeneID:111863848	TRUE	FALSE
GeneID:111863838	FALSE	TRUE
GeneID:111863903	TRUE	FALSE
GeneID:111863907	TRUE	FALSE
GeneID:111863910	TRUE	FALSE
GeneID:111864751	TRUE	FALSE
GeneID:111864750	TRUE	FALSE
GeneID:111864775	TRUE	FALSE
GeneID:111864785	FALSE	TRUE
GeneID:111864802	FALSE	TRUE
GeneID:117282334	FALSE	TRUE
GeneID:111864810	FALSE	TRUE
GeneID:111864821	TRUE	FALSE
GeneID:111864839	TRUE	FALSE
GeneID:111864845	FALSE	TRUE
GeneID:111864874	TRUE	FALSE
GeneID:111864870	FALSE	TRUE
GeneID:111864860	FALSE	TRUE
GeneID:111864879	TRUE	FALSE
GeneID:111864877	FALSE	TRUE
GeneID:111864893	FALSE	TRUE
GeneID:111864894	TRUE	FALSE
GeneID:111864927	TRUE	FALSE
GeneID:111864926	TRUE	FALSE
GeneID:111864922	TRUE	FALSE
GeneID:111864907	TRUE	FALSE
GeneID:111864925	TRUE	FALSE
GeneID:111864920	FALSE	TRUE
GeneID:111864986	TRUE	FALSE
GeneID:111864963	TRUE	FALSE
GeneID:111865051	TRUE	FALSE
GeneID:111865040	TRUE	FALSE
GeneID:111865066	FALSE	TRUE
GeneID:111865129	TRUE	FALSE
GeneID:111865121	FALSE	TRUE
GeneID:111865146	FALSE	TRUE
GeneID:111865147	FALSE	TRUE
GeneID:111865148	FALSE	TRUE
GeneID:111865141	TRUE	FALSE
GeneID:111865161	TRUE	FALSE
GeneID:111865154	TRUE	FALSE
GeneID:111865194	FALSE	TRUE
GeneID:111865192	FALSE	TRUE
GeneID:111865206	TRUE	FALSE
GeneID:111865202	FALSE	TRUE
GeneID:111865184	TRUE	FALSE
GeneID:111865203	FALSE	TRUE
GeneID:111865244	TRUE	FALSE
GeneID:111865216	FALSE	TRUE
GeneID:111865246	FALSE	TRUE
GeneID:111865218	TRUE	FALSE
GeneID:111865235	TRUE	FALSE
GeneID:111865238	TRUE	FALSE
GeneID:111865236	FALSE	TRUE
GeneID:117282377	TRUE	FALSE
GeneID:111865263	FALSE	TRUE
GeneID:111865270	TRUE	FALSE
GeneID:111865269	TRUE	FALSE
GeneID:111865280	FALSE	TRUE
GeneID:111865311	TRUE	FALSE
GeneID:111865318	FALSE	TRUE
GeneID:111865347	TRUE	FALSE
GeneID:111865338	TRUE	FALSE
GeneID:111865331	FALSE	TRUE
GeneID:111865326	TRUE	FALSE
GeneID:111865352	FALSE	TRUE
GeneID:111865344	FALSE	TRUE
GeneID:111865361	FALSE	TRUE
GeneID:111865380	TRUE	FALSE
GeneID:111865386	TRUE	FALSE
GeneID:111865408	FALSE	TRUE
GeneID:111865399	FALSE	TRUE
GeneID:111865415	TRUE	FALSE
GeneID:111865451	TRUE	FALSE
GeneID:111865452	TRUE	FALSE
GeneID:111865453	FALSE	TRUE
GeneID:111865482	TRUE	FALSE
GeneID:111865472	FALSE	TRUE
GeneID:111865468	FALSE	TRUE
GeneID:111865493	FALSE	TRUE
GeneID:111865467	TRUE	FALSE
GeneID:111865463	TRUE	FALSE
GeneID:111865506	FALSE	TRUE
GeneID:111865507	TRUE	FALSE
GeneID:111865500	TRUE	FALSE
GeneID:117282404	TRUE	FALSE
GeneID:111865521	TRUE	FALSE
GeneID:111874451	TRUE	FALSE
GeneID:111874469	TRUE	FALSE
GeneID:111874462	TRUE	FALSE
GeneID:111874461	FALSE	TRUE
GeneID:111874466	FALSE	TRUE
GeneID:111874480	FALSE	TRUE
GeneID:111874496	TRUE	FALSE
GeneID:111874489	TRUE	FALSE
GeneID:111874490	TRUE	FALSE
GeneID:111874505	FALSE	TRUE
GeneID:111874511	TRUE	FALSE
GeneID:111874515	TRUE	FALSE
GeneID:111874506	TRUE	FALSE
GeneID:111874524	FALSE	TRUE
GeneID:111874554	TRUE	FALSE
GeneID:111874558	TRUE	FALSE
GeneID:111874562	TRUE	FALSE
GeneID:111874561	FALSE	TRUE
GeneID:111874568	FALSE	TRUE
GeneID:111874617	TRUE	FALSE
GeneID:111874620	TRUE	FALSE
GeneID:111874650	TRUE	FALSE
GeneID:111874639	FALSE	TRUE
GeneID:111874673	TRUE	FALSE
GeneID:111874666	TRUE	FALSE
GeneID:111874669	TRUE	FALSE
GeneID:111874684	TRUE	FALSE
GeneID:111874699	FALSE	TRUE
[truncated: 4,083 more rows]
